1 **UBXN3B Restricts Viral Pathogenesis by Maintaining Hematopoietic Homeostasis**

2  
3 Tingting Geng <sup>1\*</sup>, Duomeng Yang <sup>1\*</sup>, Tao Lin <sup>1</sup>, Andrew Harrison <sup>1</sup>, Binsheng Wang <sup>2</sup>, Blake  
4 Torrance <sup>1</sup>, Long Yang <sup>3</sup>, Laura Haynes <sup>1</sup>, Gong Cheng<sup>4</sup>, Anthony T. Vella <sup>1</sup>, Erol Fikrig <sup>5</sup> and  
5 Penghua Wang <sup>1#</sup>

6  
7 <sup>1</sup> Department of Immunology, School of Medicine, the University of Connecticut Health Center,  
8 Farmington, CT 06030, USA.

9 <sup>2</sup> Center on Aging and Department of Genetics and Genome Sciences, the University of  
10 Connecticut Health Center, Farmington, CT 06030, USA.

11 <sup>3</sup> School of integrative Medicine, Tianjin University of Traditional Chinese Medicine, Tianjin  
12 301617, China.

13 <sup>4</sup> Department of Basic Sciences, School of Medicine, Tsinghua University, Beijing, China.

14 <sup>5</sup> Section of Infectious Diseases, Yale University School of Medicine, 333 Cedar Street, New  
15 Haven, CT, 06510, USA

16  
17 \* T.G. and D.Y contributed equally.

18  
19 # Address correspondence to: Penghua Wang, Ph.D., Department of Immunology, School of  
20 Medicine, University of Connecticut, UCONN Health, Farmington, CT 06030, USA. Email:  
21 [pewang@uchc.edu](mailto:pewang@uchc.edu), Tel: 860-679-6393.

22  
23 Running title: UBXN3B regulates hematopoiesis

26 **ABSTRACT**

27

28 Hematopoiesis is finely regulated to enable timely production of the right number and type of  
29 mature immune cells to maintain tissue homeostasis. Dysregulated hematopoiesis may  
30 compromise antiviral immunity and/or exacerbate immunopathogenesis. Herein, we report an  
31 essential and new role of ubiquitin X domain containing gene 3B (UBXN3B) in balancing  
32 myelopoiesis and lymphopoiesis. *Ubxn3b* deficiency (*Ubxn3b*<sup>-/-</sup>) results in a remarkable  
33 increase in myeloid cells and neutrophil-to-lymphocyte ratio, along with a reduction in  
34 lymphocytes in steady-state mice. This dysregulation is exacerbated during viral infection and  
35 renders mice highly vulnerable to severe lung pathology induced by severe acute respiratory  
36 syndrome coronavirus 2 and arthritis by arthritogenic alphaviruses. *Ubxn3b*<sup>-/-</sup> mice present  
37 normal type I IFNs, higher viral loads and inflammatory mediators, lower virus-specific  
38 immunoglobulin G and slower resolution of disease, when compared to *Ubxn3b*<sup>+/+</sup> littermates.  
39 Mechanistically, *Ubxn3b*<sup>-/-</sup> mice have fewer multipotent progenitors and common lymphoid  
40 progenitors, but more common myeloid progenitors. In particular, the precursor and immature B  
41 cell numbers are dramatically decreased in the bone marrow of *Ubxn3b*<sup>-/-</sup> mice. These data  
42 demonstrate that UBXN3B signaling is essential for restricting viral infection and  
43 immunopathogenesis by maintaining hematopoietic homeostasis.

44

45 Key word: hematopoiesis, UBXN, SARS-CoV-2, coronavirus, alphavirus, COVID-19.

46

47

## 48 INTRODUCTION

49  
50 The immune system is comprised of various cell types that coordinate responses to infection by  
51 maintaining tissue and immune homeostasis. Peripheral immune cells, with the exception of a  
52 few cell types such as long-lived memory T cells and some tissue macrophages, are constantly  
53 replenished from bone marrow stem cells through progenitor cells <sup>1</sup>. For instance, approximately  
54  $0.5-1 \times 10^{11}$  granulocytes are generated daily in adult human individuals <sup>2</sup>. The hematopoietic  
55 system is a hierarchically organized, somatic stem cell-maintained organ system, with long-lived  
56 and self-renewing pluripotent hematopoietic stem cells (LT-HSCs) at its apex <sup>1</sup>. LT-HSCs  
57 differentiate into short-term multipotent progenitors (MPPs or ST-HSCs) and lineage-committed  
58 hematopoietic progenitors, which in turn will eventually differentiate into the numerous mature  
59 blood cell lineages <sup>3</sup>. While at the apex of the hematopoietic hierarchy, LT-HSCs are largely  
60 quiescent, and the highly proliferative MPPs are the primary contributor to steady-state  
61 hematopoiesis <sup>4 5</sup>. MPPs are capable of differentiating into lineage-committed progenitors, e.g.,  
62 common lymphoid progenitors (CLPs) and common myeloid progenitors (CMP), which turn into  
63 blast cells leading to specific cell types. These processes involve a global change of gene  
64 expression controlled by cell-intrinsic transcription factors and epigenetic modifiers, and cell-  
65 extrinsic factors such as cytokines, chemokines, growth factors, and interactions with  
66 osteoblasts, endothelial cells, reticular cells and stromal cells in its bone marrow niche <sup>3</sup>. The  
67 HSC differentiation cascade must be finely regulated to enable timely production of the right  
68 number and type of mature cells, i.e. homeostasis, disruption of which may lead to a  
69 pathological state, such as autoimmunity, immunodeficiency, cancer etc. As example,  
70 lymphopenia and a skewed myeloid-to-lymphoid ratio in the elderly may contribute to  
71 inflammaging and impaired immunity <sup>6</sup>.

72 The human genome encodes 13 ubiquitin regulatory X (UBX) domain-containing  
73 proteins, designated UBXNs. The UBX domain shares weak homology with ubiquitin at the  
74 protein level and adopts the same three dimensional fold as ubiquitin<sup>7</sup>. A number of UBXNs

75 have been shown to bind multiple E3 ubiquitin ligases and an ATPase associated with various  
76 cellular activities (AAA ATPase), p97<sup>8,9</sup>. We and other research groups have recently shown  
77 that several UBXNs regulate viral RNA-sensing RIG-I (retinoic acid inducible gene 1) like  
78 receptor -mitochondrial antiviral viral signaling (RLR-MAVS)<sup>10-12</sup> and Nuclear factor- $\kappa$ B (NF- $\kappa$ B)  
79 signaling pathways<sup>13,14</sup>. Of note, we recently reported that UBXN3B controlled DNA virus  
80 infection by positively regulating the dsDNA-sensing cGAS (cyclic di-GMP-AMP synthase)-  
81 STING (stimulator-of-interferon-genes) signaling and innate immunity<sup>15</sup>. However, the  
82 physiological function of UBXN3B in RNA virus infection remains unknown. To this end, we  
83 studied two positive-sense single-stranded RNA [(+) ssRNA] viruses of great public health  
84 significance, severe acute respiratory syndrome (COVID-19)-causing coronavirus 2 (SARS-  
85 CoV-2), and a mosquito-borne arthritogenic alphavirus, Chikungunya virus (CHIKV). Since its  
86 emergence in humans in China late 2019, SARS-CoV-2 has infected more than 112 million and  
87 killed over 2.5 million people worldwide (Source: World Health Organization,  
88 <https://covid19.who.int>), constituting the greatest global public health crisis in the 21<sup>st</sup> century.  
89 CHIKV is the causative agent of acute and chronic crippling arthralgia. The most recent CHIKV  
90 epidemic in the Americas has resulted in over 3 million infection cases in more than 40  
91 countries (Source: Pan America Health Organization, [www.paho.org](http://www.paho.org)). Although from very  
92 different families, both SARS-CoV-2 and CHIKV can elicit inflammatory responses and massive  
93 infiltration of immune cells into their target organs. CHIKV elicits self-perpetuating inflammation  
94 characterized by potent infiltration of macrophages, monocytes, neutrophils etc. into muscles  
95 and joints<sup>16 17</sup>. SARS-CoV-2 induces life-threatening lung immunopathology, typified by  
96 elevated levels of inflammatory mediators, myeloid immune infiltrates in the lung, neutrophilia  
97 and lymphopenia<sup>18</sup>. Herein, we found that UBXN3B is essential for maintaining hematopoietic  
98 homeostasis. *Ubxn3b* deficiency (*Ubxn3b*<sup>-/-</sup>) results in a systemic change in the steady-state  
99 immune cell composition, with a remarkable increase in myeloid cells, neutrophil-to-lymphocyte  
100 ratio (N/L), and a dramatic reduction in lymphocytes. This dysregulation is exacerbated during

101 viral infection and renders mice highly susceptible to severe lung pathology induced by SARS-  
102 CoV-2 and arthritis by arthritogenic alphaviruses. Mechanistically, UB3B is essential for  
103 maintaining MPPs and CLP homeostasis, precursor B cell differentiation and proliferation.

104

## 105 RESULTS

106

### 107 UB3B controls pathogenesis of respiratory viral diseases

108 Using a tamoxifen-inducible Cre-LoxP system, we recently successfully deleted global UB3B  
109 protein expression in adult mice and demonstrated that UB3B positively regulated the  
110 STING-mediated innate immune response to a DNA virus<sup>15</sup>. To understand the physiological  
111 function of UB3B in restricting pathogenesis of RNA viral diseases, we first tested respiratory  
112 viruses of public health significance including SARS-CoV-2. Because immunocompetent adult  
113 mice are minimally permissive to clinical isolates of SARS-CoV-2, we delivered human  
114 angiotensin-converting enzyme 2 (ACE2, the cellular entry receptor for SARS-CoV)-expressing  
115 Ad5 vector (replication-defective adenovirus vector) intranasally to the mouse lung before  
116 infection<sup>19 20</sup>. We observed a slight drop in body mass a few days post SARS-CoV-2 infection  
117 (p.i.) and rapid recovery of *Ubx3b*<sup>+/+</sup> (Cre<sup>+</sup> *Ubx3b*<sup>flox/flox</sup>) mice, while there was a ~10%  
118 reduction in body weight in *Ubx3b*<sup>-/-</sup> (Cre<sup>+</sup> *Ubx3b*<sup>flox/flox</sup> treated with tamoxifen) littermates by  
119 days 3-4 p.i. and a significant delay in recovery (**Fig.1a**). Moreover, all infected *Ubx3b*<sup>-/-</sup> mice  
120 showed hunched posture and decreased mobility on day 2 after infection, which was absent  
121 from *Ubx3b*<sup>+/+</sup> animals (Supplemental Movie 1 and 2). Histopathological analyses by  
122 hematoxylin and eosin (H&E) staining revealed immune cell infiltrates in the lung of both  
123 *Ubx3b*<sup>+/+</sup> and *Ubx3b*<sup>-/-</sup> mice on day 3 p.i., compared to uninfected mice (Day 0). However,  
124 there was no significant difference in the numbers of immune infiltrates between the two  
125 genotypes (**Fig.1b**). On day 10 p.i. many clusters of brownish cells were noted in all *Ubx3b*<sup>-/-</sup>,  
126 but none in any *Ubx3b*<sup>+/+</sup> mice (**Fig.1b**). We reasoned that these brownish cells in H&E

127 staining were representative of hemosiderosis, a form of iron overload disorder resulting in the  
128 accumulation of hemosiderin, an iron-storage complex. In the lung, macrophages phagocytose  
129 red blood cells due to vascular leakage, leading to iron overload. Using iron staining we tested  
130 this hypothesis and detected a few lightly iron-laden cells on day 3 p.i., but many clusters of  
131 heavily iron-laden cells by day 10 p.i. in all the *Ubxn3b*<sup>-/-</sup> lungs compared to *Ubxn3b*<sup>+/+</sup> (**Fig.1c,**  
132 **d**). On day 35 p.i., we still noted moderate lung hemosiderosis in some knockout mice. These  
133 data suggest an essential role of UBXM3B in restricting SARS-CoV-2 pathogenesis in the lung.  
134 We next asked if these observations could be extended to other respiratory viruses, such as  
135 influenza. Indeed, *Ubxn3b*<sup>-/-</sup> mice lost more body weight; and of note 70% of them succumbed  
136 to a dose of H1N1 influenza A that was sublethal to *Ubxn3b*<sup>+/+</sup> mice (**Fig.1e, f**).

137 Severe COVID-19 pathogenesis is a combination of a direct cytopathic effect of SARS-  
138 CoV-2 replication and hyper-inflammation in the lung<sup>18</sup>. In particular, COVID-19 fatality is  
139 strongly associated with elevated inflammatory mediators (interleukin 6 IL-6, tumor necrosis  
140 factor TNF- $\alpha$  etc.)<sup>18</sup>. We first examined viral loads and immune gene expression. The viral  
141 loads in the lungs were higher in *Ubxn3b*<sup>-/-</sup> when compared to *Ubxn3b*<sup>+/+</sup> mice on day 3 p.i, and  
142 by day 10 p.i. virus was almost cleared (**Fig.2a**). The serum cytokines IL-6, TNF- $\alpha$ , IL-10 and  
143 GM-CSF were higher in *Ubxn3b*<sup>-/-</sup> than in *Ubxn3b*<sup>+/+</sup> on day 3 p.i. (**Fig.2b**), which is consistent  
144 with clinical observations in severe COVID-19 patients. The concentrations of serum IFN- $\alpha$ ,  
145 CXCL10 and IFN- $\gamma$  were modestly upregulated, but equally in both *Ubxn3b*<sup>-/-</sup> and *Ubxn3b*<sup>+/+</sup>  
146 mice after SARS-CoV-2 infection, suggesting a normal type I/II IFN response (**Fig.2b**).

147 COVID-19 fatality is strongly associated with an imbalance in immune cell  
148 compartmentalization, characterized by neutrophilia and lymphopenia<sup>21 22 23 24 25 26</sup>. We analyzed  
149 neutrophils and T cells in the lung by flow cytometry and found that the total CD45<sup>+</sup> immune cell  
150 counts per lung were ~10-fold higher in SARS-CoV-2-infected animals than mock-treated  
151 animals. However, there was no significant difference between *Ubxn3b*<sup>-/-</sup> and *Ubxn3b*<sup>+/+</sup>  
152 littermates (**Fig.3a**). Upon close examination we detected ~3 -fold increase in *Ubxn3b*<sup>-/-</sup>

153 compared to *Ubxn3b*<sup>+/+</sup> mice in the frequency of CD11b<sup>+</sup> cells, while total and CD4<sup>+</sup> T cells were  
154 reduced in *Ubxn3b*<sup>-/-</sup> (**Fig.3b**). Importantly, the ratio of neutrophil-to-T lymphocytes (N/L) in the  
155 lung was significantly higher (3.2-fold) in *Ubxn3b*<sup>-/-</sup> (**Fig.3c**), which is consistent with clinical  
156 observations in severe COVID-19 patients<sup>27</sup>. This prompted us to examine more immune cell  
157 populations in the lung and peripheral blood, and the longer impact of SARS-CoV-2 infection on  
158 immune cells. We noted ~3-fold increase in neutrophil and 10-fold decrease in B cell  
159 frequencies (**Fig.3d**, Supplemental **Fig.1**); the N/L ratio was also much higher in the blood of  
160 *Ubxn3b*<sup>-/-</sup> than *Ubxn3b*<sup>+/+</sup> mice on day 3 p.i. (**Fig.3e**). By day 35 p.i., lower total immune cells  
161 per lung in *Ubxn3b*<sup>-/-</sup> than *Ubxn3b*<sup>+/+</sup> mice were observed, however, more myeloid cells such as  
162 neutrophils and macrophages/monocytes, a higher N/L ratio, but fewer B and T lymphoid cells  
163 in *Ubxn3b*<sup>-/-</sup> (**Fig.3f, g**). Of note, the B cell frequency were most dramatically decreased (5-20-  
164 fold) in both the lung and blood (**Fig.3f, g**). Consistently, there were ~40% fewer total CD45<sup>+</sup>  
165 cells in the blood (**Fig.3h**) and lymphocytes in the marginal zone of the white pulp marked by  
166 greater myeloid infiltrates in the red pulp in the spleen of *Ubxn3b*<sup>-/-</sup> than in *Ubxn3b*<sup>+/+</sup> on day 35  
167 p.i. (Supplemental **Fig.2**).

168

### 169 **UBXN3B controls pathogenesis of alphaviral arthritis**

170 The aforementioned results demonstrate a profound change in the immune cell  
171 compartmentalization in *Ubxn3b*<sup>-/-</sup> during SARS-CoV-2 infection, characterized by much greater  
172 myeloid and fewer lymphoid cells. We then asked if this phenotype could be extended to other  
173 viral diseases in the absence of *Ubxn3b*. Although from very different families, both SARS-CoV-  
174 2 and CHIKV, an arthritogenic alphavirus, can elicit inflammatory cytokines and massive  
175 infiltration of immune cells into their target organs. CHIKV was directly injected into one footpad  
176 to induce swelling and acute arthritis in mice. *Cre*<sup>+</sup> *Ubxn3b*<sup>flox/flox</sup> (*Ubxn3b*<sup>+/+</sup>) and tamoxifen-  
177 treated *Cre*<sup>-</sup> *Ubxn3b*<sup>flox/flox</sup> (wild-type) mice showed progressive footpad swelling, which peaked  
178 on day 6 p.i. and receded rapidly. In contrast, tamoxifen-treated *Cre*<sup>+</sup> *Ubxn3b*<sup>flox/flox</sup> (*Ubxn3b*<sup>-/-</sup>)

179 mice presented more severe and persistent foot swelling (**Fig.4a, b**). Histopathological analyses  
180 by H&E staining confirmed increased immune cell infiltration into the muscles and joints of  
181 *Ubxn3b*<sup>-/-</sup> compared to *Ubxn3*<sup>+/+</sup> littermates on day 16 p.i. (**Fig.4c, d**). Similar results were  
182 observed for another arthritogenic alphavirus, O'nyong nyong (ONNV) (Supplemental **Fig.3**).  
183 Moreover, the CHIKV viremia on days 2 and 4 p.i., and viral loads in footpads on days 4 and 8  
184 p.i. were significantly higher in *Ubxn3b*<sup>-/-</sup> than *Ubxn3*<sup>+/+</sup> mice (Supplemental **Fig.4**). Next the  
185 concentrations of serum immune mediators by multiplex ELISA were assessed, and higher  
186 levels of IL-6, CXCL10, TNF- $\alpha$  and IFN- $\gamma$  with different kinetics were observed in *Ubxn3b*<sup>-/-</sup> over  
187 *Ubxn3b*<sup>+/+</sup> mice, in particular, even after viremia had been cleared on day 8 p.i (Supplemental  
188 **Fig.5**). We detected more neutrophils and macrophages/monocytes, but fewer B and T cells in  
189 CHIKV-targeted tissues, e.g. the footpad, blood and spleen of *Ubxn3b*<sup>-/-</sup> than *Ubxn3b*<sup>+/+</sup> mice  
190 (**Fig.4e**). Of note, the N/L ratios were much higher in all the tissue of *Ubxn3b*<sup>-/-</sup> mice (**Fig.4fe**).  
191 These data suggest that UBXM3B signaling is essential for not only clearing CHIKV rapidly but  
192 also restraining immunopathology post viral clearance.

193 Because B/T lymphocyte counts were significantly reduced in *Ubxn3b*<sup>-/-</sup>, we asked if this  
194 deficiency influenced production of virus-specific antibodies. Indeed, the concentrations of  
195 serum anti-CHIKV/ONNV/influenza immunoglobulin G (IgG) were ~50% lower in *Ubxn3b*<sup>-/-</sup> than  
196 in *Ubxn3b*<sup>+/+</sup> mice (Supplemental **Fig.6**).

197

### 198 **UBXM3B regulates steady-state hematopoietic homeostasis**

199 These results suggest an essential role of UBXM3B in maintenance of immune cell homeostasis  
200 during viral infection regardless of viral species. Therefore, to test the hypothesis that  
201 dysregulated immune homeostasis is caused by *Ubxn3b*<sup>-/-</sup> deficiency, we reasoned that in the  
202 steady state *Ubxn3b*<sup>-/-</sup> mice should have alterations that cannot be explained by infection.  
203 Indeed, by flow cytometry, we observed a significant increase in the frequencies of myeloid cells  
204 (neutrophils, monocytes, macrophages), in the blood and spleen of *Ubxn3b*<sup>-/-</sup> compared to



205 *Ubxn3b*<sup>+/+</sup> mice. Although the T cell frequencies were slightly lower, its counts were significantly  
206 lower in both tissues of *Ubxn3b*<sup>-/-</sup> (**Fig.5a, b**). The total CD45<sup>+</sup> count per spleen was ~3-fold  
207 lower in *Ubxn3b*<sup>-/-</sup> (**Fig.5b**). Of note, *Ubxn3b*<sup>-/-</sup> mice had over 10 times lower B cell counts and  
208 frequencies in both tissues of knockout mice (**Fig.5a, b**). Although the magnitudes of difference  
209 in each immune cell frequency and count varied with tissues, the N/L ratios were uniformly  
210 much higher in all tissues of *Ubxn3b*<sup>-/-</sup> when compared to *Ubxn3b*<sup>+/+</sup> mice (**Fig.5a, b**).

211 These results suggested that UBXM3B regulates hematopoietic homeostasis. To this  
212 end, we first quantitated mature immune cells in the bone marrow. Among all live cells (after  
213 lysis of red blood cells), neutrophils were most abundant, then B cells. Consistent with  
214 observations in the peripheral immune organs, the frequency of neutrophils was significantly  
215 greater, while the number of B cells was ~6-fold lower in *Ubxn3b*<sup>-/-</sup> than in *Ubxn3b*<sup>+/+</sup> mice  
216 (**Fig.6a, b**). These results suggest that elevated N/L ratios in *Ubxn3b*<sup>-/-</sup> is due to dysregulated  
217 hematopoiesis, which we tested by assessing bone marrow stem cells and progenitors. Total  
218 HSCs (Lin<sup>-</sup> Sca<sup>+</sup> Kit<sup>+</sup>) contains two populations, long-term HSCs, which are capable of self-  
219 renewal but are quiescent at steady state, and short-term multipotent HSCs (also known as  
220 MPPs), which are capable of differentiating into lineage-committed progenitors. We noted that  
221 there were fewer total HSCs in *Ubxn3b*<sup>-/-</sup> when compared to *Ubxn3b*<sup>+/+</sup>; this was because of a  
222 decrease in MPPs, but not LT-HSCs, which were the same (**Fig.6c, d**). The frequency of  
223 lineage-committed common lymphoid progenitors (CLPs) was also reduced, while the common  
224 myeloid progenitors (CMPs) trended higher in *Ubxn3b*<sup>-/-</sup>. Remarkably, the B cell precursors  
225 (Pre-B) and immature B cells were significantly lower in *Ubxn3b*<sup>-/-</sup> (**Fig.6c, d**).

226

## 227 DISCUSSION

228

229 UBXM3B might participate in diverse cellular activities, ranging from lipid metabolism<sup>28,29,30,28,31</sup>  
230<sup>32-35</sup>, protein degradation<sup>36,37</sup>, mRNA stability<sup>38</sup>, protein translocation<sup>39</sup> to regulation of innate

231 immunity<sup>15</sup>. In this study, we discovered a novel physiological function of UBXN3B in  
232 hematopoietic hemostasis with subsequent control of immunopathogenesis during viral infection.  
233 These multifaceted functions of UBXN3B are likely attributable to its capability as an adaptor to  
234 interface different E3 ligases and substrates<sup>10</sup> under different physiological conditions and  
235 developmental stages. The involvement of an adaptor in an E3 ligase action could greatly  
236 expand the substrate spectrum of the E3 ligase in response to various physiological and  
237 environmental cues. Our conclusion is substantiated by several pieces of evidence. First,  
238 *Ubxn3b*<sup>-/-</sup> mice presented worse lung damage during SARS-CoV-2 infection and arthritis elicited  
239 by arthritogenic alphaviruses than *Ubxn3b*<sup>+/+</sup> mice. Second, *Ubxn3b*<sup>-/-</sup> mice had higher viral  
240 loads and inflammatory mediators such as IL-6 and TNF- $\alpha$ . Third, lymphocytes, in particular the  
241 B cell numbers were significantly lower, while neutrophils and monocytes/macrophages were  
242 greater in various *Ubxn3b*<sup>-/-</sup> organs during the steady state and viral infection. Fourth,  
243 production of the virus-specific IgG was impaired in *Ubxn3b*<sup>-/-</sup> mice. Mechanistically, UBXN3B  
244 might control RNA virus infection by regulating STING<sup>15 40</sup>. However, steady-state  
245 hematopoiesis was normal in *Sting*-deficient mice<sup>41</sup>, suggesting that the primary function of  
246 UBXN3B during RNA virus infection is independent of STING. Furthermore, expression of type I  
247 IFNs was normal in *Ubxn3b*<sup>-/-</sup> mice. These data suggest that dysregulated hematopoiesis may  
248 be the main contributor to failure of viral clearance and prolonged immunopathology in  
249 *Ubxn3b*<sup>-/-</sup> mice. Indeed, the fine balance between lymphopoiesis and myelopoiesis was  
250 interrupted, characterized by more CMPs and neutrophils, and fewer CLPs and B cells in the  
251 *Ubxn3b*<sup>-/-</sup> bone marrow. In particular, proliferation of precursor B cells was significantly inhibited  
252 in the *Ubxn3b*<sup>-/-</sup> bone marrow, suggesting that UBXN3B play an important role in transition of  
253 progenitor B to precursor B cells.

254 Although belonging to very different families of RNA viruses, both arthritogenic  
255 alphaviruses and SARS-CoV-2 elicit immunopathology in their target tissues, including massive  
256 immune infiltrates and elevated levels of systemic pro-inflammatory mediators<sup>16 17 18</sup>. In

257 particular, COVID-19 fatality is strongly associated with neutrophilia and lymphopenia <sup>18</sup>, which  
258 was partly recapitulated in *Ubxn3b*<sup>-/-</sup> mice. These animals were typified by neutrophilia and  
259 lymphopenia during steady state and viral infection, were highly prone to vascular damage by  
260 SARS-CoV-2 in the lung, and were slow to recover from infection. Similarly, viral clearance and  
261 resolution of arthritis elicited by alphaviruses was significantly delayed in *Ubxn3b*<sup>-/-</sup> mice. This  
262 was not due to type I IFNs, which were normal in *Ubxn3b*<sup>-/-</sup> mice; rather likely because of a  
263 reduction in B/T cell numbers and consequently virus-specific antibody production. Indeed, T  
264 lymphopenia is associated with shortened survival independently of and /or additive to  
265 traditional risk factors, especially when accompanied by heightened inflammation in general  
266 adults <sup>42</sup>. Primary B-cell immunodeficiency may lead to a defective production of antigen-  
267 specific antibodies and predisposition to recurrent and severe infections <sup>43</sup> and frequently  
268 autoimmune diseases <sup>44</sup>. On the other hand, heightened immunopathology and tissue damage  
269 persisted in *Ubxn3b*<sup>-/-</sup> mice even after viral clearance (day 16 post CHIKV, day 10 post SARS-  
270 CoV-2 inoculation), suggesting that UBKN3B controls immunopathogenesis disassociated from  
271 viral replication. Indeed, chronic CHIKV arthritis pathogenesis can progress without active viral  
272 replication <sup>45</sup>. The hyperinflammation phase of COVID-19 generally happens after viral load  
273 peak, with a few infectious viral particles <sup>46</sup>. At the post viral clearance stage, a high N/L ratio  
274 may underlie sustained inflammation. Indeed, high N/L ratios are correlated with poor prognosis  
275 of severe COVID-19 patients <sup>47 27</sup>. The N/L ratio is also the most reliable biomarkers associated  
276 with numerous chronic inflammatory diseases, such as type II diabetes <sup>48</sup>, cardiovascular  
277 disease <sup>49</sup>, aging <sup>50</sup> etc., which are significant risk factors for COVID-19 mortality <sup>18</sup>. These  
278 conditions are characterized by a low-grade pro-inflammatory and an “immunosenescence”-like  
279 immune state that is unable to clear viruses <sup>27</sup>. In this regard, UBKN3B deficiency might  
280 resemble the aging immune state, which is prone to viral infection and chronic inflammatory  
281 conditions. The protective role of UBKN3B in these disease conditions in mice may be  
282 potentially applicable to those in humans considering that the UBKN3B protein is highly

283 conserved in mammals (98% identity between human and rodent protein). Importantly, an  
284 rs374702773 (delta T allele in intron) in UB3N3B is associated with protection against alcoholic  
285 liver cirrhosis, a chronic inflammatory condition in humans<sup>51</sup>.

286 In summary, our results suggest that a high N/L ratio predisposes an individual to  
287 persistently heightened immunopathology during viral infection that can lead to damaging organ  
288 inflammation. Immediate future work will pinpoint the molecular mechanism of UB3N3B action  
289 in immune progenitors and function of UB3N3B in auto-inflammatory diseases.

## 290 MATERIALS AND METHODS

291

### 292 *Mouse model*

293 The mouse line with the exon 1 of *Ubxn3b* flanked by two LoxP sites (*Ubxn3b*<sup>flox/flox</sup>) were  
294 generated via homologous recombination by Dr. Fujimoto at Nagoya University<sup>32</sup>. The  
295 homozygous *Ubxn3b*<sup>flox/flox</sup> were then crossed with homozygous tamoxifen-inducible Cre  
296 recombinase-estrogen receptor T2 mice (The Jackson Laboratory, Stock # 008463) to generate  
297 Cre<sup>+</sup> *Ubxn3b*<sup>flox/flox</sup> littermates. To induce *Ubxn3b* deletion, > 6-weeks old mice were injected  
298 with 100  $\mu$ l of tamoxifen (10 mg /ml in corn oil) (Sigma, #T5648) via intraperitoneal (i.p.)  
299 every 2 days for a total duration of 8 days (4 doses). Successful deletion of *Ubxn3b* was  
300 confirmed in our recent study<sup>12</sup>. A half of Cre<sup>+</sup> *Ubxn3b*<sup>flox/flox</sup> litters were treated with tamoxifen  
301 and designated *Ubxn3b*<sup>-/-</sup>; the other half were treated with corn oil only and designated  
302 *Ubxn3b*<sup>+/+</sup>. Mice were allowed to purge tamoxifen for at least 4 weeks before any infection or  
303 analyses was performed. The animal protocols were approved by the Institutional Animal Care  
304 and Use Committee at the University of Connecticut and Yale University.

305

### 306 *Antibodies, Cell lines and Viruses*

307 Human embryonic kidney 293 cells transformed with T antigen of SV40 (HEK293T, #  
308 CRL-3216) and Vero cells (monkey kidney epithelial cells, # CCL-81) were purchased from  
309 American Type Culture Collection (ATCC) (Manassas, VA20110, USA). These cell lines are not  
310 listed in the database of commonly misidentified cell lines maintained by ICLAC. Cells were  
311 grown in DMEM supplemented with 10% fetal bovine serum (FBS ) and antibiotics/antimycotics  
312 (Life Technologies, Grand Island, NY 14072 USA). We routinely added MycoZAP (Lonza Group,  
313 Basel, Switzerland) to cell cultures prevent mycoplasma contamination.

314 SARS-CoV-2 (NR-52281, Isolate USA-WA1/2020) was provided by BEI Resources  
315 (funded by National Institute of Allergy and Infectious Diseases and managed by ATCC, United

316 States). The CHIKV French La Reunion strain LR2006-OPY1 was a kind gift of the Connecticut  
317 Agricultural Experiment Station at New Haven, CT, USA. The CHIKV vaccine strain 181, clone  
318 25 was recovered from a plasmid and used for enzyme-Linked Immunosorbent assay (ELISA)<sup>52</sup>  
319 <sup>53</sup>. The ONNV UgMP30 strain (NR-51661) was provided by BEI Resources. All these viruses  
320 were propagated in Vero cells. The full-length human ACE2 [Accession No: NM\_021804.2]  
321 cDNA was inserted into pAV-EGFP-CMV/FLAG and Ad5 viruses were prepared by Vector  
322 Builder Inc. (Chicago, IL 60609, USA).

323

#### 324 *Concentration of SARS-CoV-2*

325 The virus was grown in Vero cells for 72hrs, and the culture medium was cleared by brief  
326 centrifugation. A PEG-it Virus Precipitation Solution (Cat# LV810A-1, System Biosciences, Palo  
327 Alto, CA 94303, USA) was added to 40ml of virus culture at a 1:4 ratio, incubated overnight at  
328 4°C. The mixture was centrifuged at 1500xg for 30 min, and the resulting pellet was suspended  
329 in 1ml of DMEM medium. In parallel, Vero cell culture medium without virus was processed in  
330 the same way and used for mock infection.

331

#### 332 *Plaque-Forming Assay*

333 Quantification of infectious viral particles in sera or homogenized tissues was performed on  
334 Vero cell monolayer<sup>54</sup>. Briefly, viral samples were incubated with confluent Vero cells (6-well  
335 plate) at 37°C for 2 hr. The inoculum was then removed and replaced with 2 ml of DMEM  
336 complete medium with 1% SeaPlaque agarose (Cat.# 50100, Lonza). The cells were incubated  
337 at 37°C, 5% CO<sub>2</sub> for 3 days, and on the fourth day the cells were stained with Neutral Red  
338 (Sigma-Aldrich) overnight.

339

#### 340 *Mouse Infection and Monitoring*

341 Mice were administered intranasally  $2 \times 10^8$  plaque forming units (PFU) of Ad5-hACE2, after 5  
342 days then intranasally inoculated with  $2 \times 10^5$  PFU of SARS-CoV-2 or mock. The body mass of  
343 individual mice was weighed on the day of infection (Day 0) as a baseline. The percentage  
344 change in an animal was calculated as  $100 \times (\text{Day } n - \text{Day } 0) / \text{Day } 0$ , where  $n$  defines the length  
345 of infection (in days).

346 About  $3 \times 10^5$  plaque-forming units (PFU) of CHIKV LR2006-OPY1 or ONNV was  
347 inoculated at the ventral side of a hind foot subcutaneously. The thickness and width of the  
348 perimetatarsal area of the hind foot were measured using a precision metric caliper. The foot  
349 dimension was calculated as  $\text{width} \times \text{thickness}$ , and the results were expressed as fold  
350 increase in the foot dimension after infection compared to before infection (day 0 baseline).

351

### 352 *Tissue Histology*

353 Tissues were fixed in 4% paraformaldehyde (PFA), embedded in paraffin, cut into  $4 \mu\text{M}$ - thick  
354 sections, immobilized to glass slides, decalcified, and processed for hematoxylin and eosin  
355 staining. Arbitrary arthritic disease scores (on a 1–5 scale with 1 being the slightest, 5 the worst)  
356 were assessed using a combination of histological parameters, including exudation of fibrin and  
357 inflammatory cells into the joints, alteration in the thickness of tendons or ligament sheaths, and  
358 hypertrophy and hyperlexia of the synovium<sup>21</sup> in a double-blinded manner.

359 Hemosiderosis was evaluated by iron staining (Prussian Blue stain) (Cat. # ab150674,  
360 from Abcam, Cambridge, CB2 0AX, UK). Lungs were fixed in 4% PFA, embedded in paraffin,  
361 cut into  $4 \mu\text{M}$ - thick sections, immobilized to glass slides, deparaffinized in xylene, rinsed with  
362 100% ethanol, hydrated progressively in 95%, 70% ethanol and distilled water. The slides were  
363 incubated in Iron Stain Solution (1:1 of potassium ferrocyanide solution to hydrochloric acid  
364 solution) for 3 min at ambient temperature, rinsed thoroughly in distilled water, stained in  
365 Nuclear Fast Red Solution for 5 minutes, rinsed again with distilled water 4 times, dehydrated in  
366 95% alcohol followed by absolute alcohol, and finally mounted in synthetic resin. The slides

367 were assessed with an Accu-Scope microscope EXI-310 and images were acquired by an  
368 Infinity II camera and software.

369

#### 370 *Reverse Transcription and Quantitative (q) PCR*

371 Up to  $1 \times 10^6$  cells or 10mg, tissues were collected in 350  $\mu$ l of RLT buffer (QIAGEN RNeasy  
372 Mini Kit). RNA was extracted following the QIAGEN RNeasy manufacturer's instructions.  
373 Reverse transcription of RNA into complementary DNA (cDNA) was performed using the BIO-  
374 RAD iScript™ cDNA Synthesis Kit. Quantitative PCR (qPCR) was performed with gene-specific  
375 primers and SYBR Green PCR master mix. Results were calculated using the  $-\Delta\Delta C_t$  method  
376 and a housekeeping gene, beta actin, as an internal control. The qPCR primers and probes for  
377 immune genes were reported in our previous studies<sup>15, 40,55</sup>. The primers for SARS-CoV-2 were  
378 forward: 5'-GAC CCC AAA ATC AGC GAA AT-3' and reverse: 5'-TCT GGT TAC TGC CAG  
379 TTG AAT CTG-3', CHIKV forward: 5' -GCGAATTCGGCGCAGCACCAAGGACAACCTTCA-3'  
380 and reverse 5' -AATGCGGCCGCTAGCAGCATATTAGGCTAAGCAGG-3' , ONNV forward  
381 primer: 5' -GCAGGGAGGCCAGGACAGT-3' and reverse 5' -  
382 GCCCCTTTTTCYTTGAGCCAGTA-3' .

383

#### 384 *Fluorescence-Activated Cell Sorting (FACS)*

385 FACS was performed according to our published study<sup>17</sup>. Mouse tissues were minced with a  
386 fine scissor and digested in 4 mL of digestion medium [20 mg/mL collagenase IV (Sigma-Aldrich,  
387 St. Louis, MO, USA), 5 U/mL dispase (Stemcell, Cambridge, MA, USA), and 50 mg/mL DNase I  
388 mix (Qiagen, Germantown, MD, USA) in complete RPMI1640 medium] at 37 °C for 4 hrs. The  
389 lysate was filtrated with a 40 $\mu$ m cell strainer. Cells were then pelleted down by centrifugation at  
390 500  $\times$  g for 5 min. The red blood cells in the cell pellet were lysed three times with a lysis buffer  
391 (Cat. # 420301 from BioLegend, San Diego, CA 92121, USA). Cells were suspended in FACS



392 buffer and stained for 30 min at 4 °C with the desired antibody cocktails (Biolegend, San Diego,  
393 CA, US) of APC-Fire 750-anti CD11b (Cat. # 101261, clone M1/70), Alexa Fluor 700-anti Ly-6G  
394 (Cat. # 127621, clone 1A8), Brilliant Violet 421-anti CD11c (Cat. # 117343, clone N418), PerCP-  
395 Cy5.5-anti MHC II (Cat. # 107625, clone M5/114.15.2), PE-anti Tetherin (PCDA1) (Cat. # 12703,  
396 clone 10C2), Brilliant Violet 510-anti F4/80 (Cat. # 123135, clone BM8), APC-anti CD68 (Cat. #  
397 137007, clone FA-11), PE-Dazzle 594-anti CD3 epsilon (Cat. # 100347, clone 145-2C11),  
398 Brilliant Violet 711-anti CD4 (Cat. # 100557, clone RM4-5), Brilliant Violet 570-anti CD8a (Cat. #  
399 100739, clone 53-6.7), Brilliant Violet 650 anti-CD161 (NK1.1) (Cat. # 108735, clone PK136),  
400 FITC anti-CD117 (cKit) (Cat. # 105805, clone 2B8), PE anti- erythroid cells (Cat. # 116207,  
401 clone TER-119), Brilliant Violet 711-anti CD115 (Cat. # 135515, clone AFS98), FITC-anti CD25  
402 (Cat. # 102005, clone PC61), Zombie UV (Cat. # 423107), PE-Cy7-anti CD45 (Cat. # 103113,  
403 clone 30-F11), TruStain FcX-anti CD16/32 (Cat. # 101319, clone 93), APC anti-CD127 (IL-7Ra)  
404 (Cat. # 135011, clone A7R34), PE-Dazzle 594 anti-Sca-1 (Ly-6A/6E) (Cat. # 108137, clone D7),  
405 PE-Cy5 anti-Flt-3 (CD135) (Cat. # 135311, clone A2F10), Brilliant Violet 421-anti CD34 (Cat. #  
406 119321, clone MEC14.7), PE anti-CD16/32 (Cat. # 101307, clone 93), Brilliant Violet 711-anti  
407 IgM (Cat. # 406539, clone RMM-1), Brilliant Violet 421-anti CD45R (B220) (Cat. # 103239,  
408 clone RA3-6B2), Alexa Fluor 700-anti CD19 (Cat. # 115527, clone 6D5), PE-Cy7 anti-CD93  
409 (Cat. # 136505, clone AA4.1) and Lin- (anti-CD4, CD8, CD11b, Cd11c, Gr1, NK1.1, TER119,  
410 Singlec-F, FcεRIa, CD19, B220 cocktail). After staining and washing, the cells were fixed with 4%  
411 PFA and analyzed on a Becton-Dickinson FACS ARIA II, CyAn advanced digital processor  
412 (ADP). Data were analyzed using the FlowJo software. Among CD45<sup>+</sup> cells, CD11b<sup>+</sup> Ly6G<sup>+</sup> cells  
413 were classified as neutrophils, Ly6G<sup>-</sup>CD11b<sup>+</sup> F4/80<sup>+</sup> as monocytes/macrophages, Ly6G<sup>-</sup> CD11b<sup>+</sup>  
414 CD115<sup>+</sup> as monocytes, Ly6G<sup>-</sup> CD11c<sup>+</sup> MHC II<sup>+</sup> as dendritic cells (DC), CD3<sup>+</sup> as total T cells,  
415 CD3<sup>+</sup> CD4<sup>+</sup> as CD4 T cells, CD3<sup>+</sup> CD8<sup>+</sup> as CD8 T cells, CD19<sup>+</sup> as B cells. Lin<sup>-</sup> Sca<sup>+</sup> Kit<sup>+</sup> cells  
416 were identified as total HSCs, which were subdivided into Flt3<sup>high</sup> (short-term HSC or MPP) and  
417 Flt3<sup>low</sup> (long-term HSC). Lin<sup>-</sup> Sca<sup>-</sup> Kit<sup>+</sup> cells were subdivided into CD34<sup>low</sup> CD16/32<sup>low</sup> (MEP),

418 CD34<sup>high</sup> CD16/32<sup>low</sup> (CMP) and CD34<sup>low</sup> CD16/32<sup>high</sup> (GMP). The Lin<sup>-</sup> CD127<sup>+</sup> Kit<sup>+</sup> cells were  
419 identified as CLP.

420

#### 421 *Multiplex Enzyme-Linked ImmunoSorbent Assay (ELISA)*

422 We used a LEGENDPlex (Biolegend, San Diego, CA 92121, USA) bead-based immunoassay to  
423 quantify the cytokine concentrations in the cell culture supernatant of SARS-CoV-2 infected  
424 cells. The procedures were exactly the same as in the product manual. Briefly, the supernatants  
425 or standards were mixed with antibody-coated microbeads in a filter-bottom microplate, and  
426 incubated at room temperature for 2hrs with vigorous shaking at 500 rpm. After removal of  
427 unbound analytes and two washes, 25  $\mu$ L of detection antibodies were added to each well, and  
428 the plate was incubated at room temperature for 1hr with vigorous shaking at 500 rpm. 25  $\mu$ L of  
429 SA-PE reagent was then added directly to each well, and the plate was incubated at room  
430 temperature for 30min with vigorous shaking at 500 rpm. The beads were washed twice with  
431 wash buffer, and then transferred to a microfuge tube. The beads were fixed with 4% PFA for  
432 15min and resuspended in the assay buffer. The beads were run through a BIORAD ZE5 and  
433 the concentrations of analytes were calculated with the standards included using the  
434 LEGENDPlex software.

435

#### 436 *Quantification of IgG by Enzyme-Linked ImmunoSorbent Assay (ELISA)*

437 One nanogram of recombinant SARS-CoV-2 Spike protein,  $\sim 1 \times 10^6$  viral particles in coating  
438 buffer (0.05 M carbonate-bicarbonate, pH 9.6), or recombinant A/PR/8/34 influenza NP  
439 (generated by UConn Health Protein Expression Core) was coated to a 96-well microplate at  
440 4°C overnight. The plate was washed once with wash solution (50 mM Tris, 0.14 M NaCl, 0.05%  
441 Tween 20, pH 8.0), and blocked with 4% bovine serum albumin at room temperature for 2hrs.  
442 100 $\mu$ L of each diluted serum (500-fold) was added a well and incubated at room temperature for  
443 1hr, then washed three times. 100 $\mu$ L of diluted horseradish peroxidase-conjugated goat anti-

444 mouse IgG was added to each well and incubated at room temperature for 1hr. After stringency  
445 wash, 100 $\mu$ L of substrate 3,3',5,5' - tetramethylbenzidine (TMB) was added to each well and  
446 incubated at room temperature for 5-30min for color development, and terminated by 100 $\mu$ L of  
447 0.16M sulfuric acid. The absorption at wavelength 450nm ( $A_{450nm}$ ) was read on a Cytation 1  
448 plate reader (BioTek, Winooski, VT, USA).

449

#### 450 *Data Acquisition and Statistical Analysis*

451 The sample size chosen for our animal experiments in this study was estimated according to  
452 our prior experience in similar sets of experiments and power analysis calculations  
453 ([http://isogenic.info/html/power\\_analysis.html](http://isogenic.info/html/power_analysis.html)). All animal results were included and no method  
454 of randomization was applied. All data were analyzed with a GraphPad Prism software by non-  
455 parametric Mann-Whitney test or two-tailed Student's *t*-test depending on the data distribution.  
456 The survival curves were analyzed by Log-Rank test. P values of  $\leq 0.05$  were considered  
457 statistically significant.

458

459 **Footnotes**

460

461 Author contribution: T.G designed and performed the majority of the experimental procedures  
462 and data analyses. D.Y., T.L., A.G.H. and L.Y. contributed to some of the experimental  
463 procedures and/or provided technical support. B.W. contributed to some FACS analyses. B.T.  
464 and L.H. helped to acquire the influenza data. G.C., A.T.V. and E.F. helped with data  
465 interpretations. P.W. conceived and oversaw the study. T.G. and P.W. wrote the paper and all  
466 the authors reviewed and/or modified the manuscript.

467

468 Funding Source: This project was funded in part by National Institutes of Health grants to P. W,  
469 R01AI132526 and R21AI155820.

470

471 Conflict of Interest: No financial or non-financial interest to disclose.

472

473

474

475 **References**

476

- 477 1 Boettcher, S. & Manz, M. G. Regulation of Inflammation- and Infection-Driven  
478 Hematopoiesis. *Trends Immunol* **38**, 345-357, doi:10.1016/j.it.2017.01.004 (2017).
- 479 2 Dincey, J. T., Deubelbeiss, K. A., Harker, L. A. & Finch, C. A. Neutrophil kinetics in man.  
480 *J Clin Invest* **58**, 705-715, doi:10.1172/JCI108517 (1976).
- 481 3 Rieger, M. A. & Schroeder, T. Hematopoiesis. *Cold Spring Harb Perspect Biol* **4**,  
482 doi:10.1101/cshperspect.a008250 (2012).
- 483 4 Busch, K. *et al.* Fundamental properties of unperturbed haematopoiesis from stem cells  
484 in vivo. *Nature* **518**, 542-546, doi:10.1038/nature14242 (2015).
- 485 5 Rodriguez-Fraticelli, A. E. *et al.* Clonal analysis of lineage fate in native haematopoiesis.  
486 *Nature* **553**, 212-216, doi:10.1038/nature25168 (2018).
- 487 6 Groarke, E. M. & Young, N. S. Aging and Hematopoiesis. *Clin Geriatr Med* **35**, 285-293,  
488 doi:10.1016/j.cger.2019.03.001 (2019).
- 489 7 Schubert, C. & Buchberger, A. UBX domain proteins: major regulators of the AAA  
490 ATPase Cdc48/p97. *Cell Mol Life Sci* **65**, 2360-2371 (2008).
- 491 8 Kondo, H. *et al.* p47 is a cofactor for p97-mediated membrane fusion. *Nature* **388**, 75-78  
492 (1997).
- 493 9 Alexandru, G. *et al.* UBXD7 binds multiple ubiquitin ligases and implicates p97 in  
494 HIF1alpha turnover. *Cell* **134**, 804-816, doi:10.1016/j.cell.2008.06.048 (2008).
- 495 10 Wang, P. *et al.* UBXN1 interferes with Rig-I-like receptor-mediated antiviral immune  
496 response by targeting MAVS. *Cell Rep* **3**, 1057-1070, doi:10.1016/j.celrep.2013.02.027  
497 (2013).
- 498 11 Kim, J. H. *et al.* FAS-associated factor-1 positively regulates type I interferon response  
499 to RNA virus infection by targeting NLRX1. *PLoS Pathog* **13**, e1006398,  
500 doi:10.1371/journal.ppat.1006398 (2017).
- 501 12 Dai, T. *et al.* FAF1 Regulates Antiviral Immunity by Inhibiting MAVS but Is Antagonized  
502 by Phosphorylation upon Viral Infection. *Cell Host Microbe* **24**, 776-790 e775,  
503 doi:10.1016/j.chom.2018.10.006 (2018).
- 504 13 Wang, Y. B. *et al.* Ubiquitin-associated Domain-containing UBX Protein UBXN1 is a  
505 Negative Regulator of NF-kappaB Signaling. *J Biol Chem*, doi:10.1074/jbc.M114.631689  
506 (2015).
- 507 14 Hu, Y. *et al.* Multiple UBXN family members inhibit retrovirus and lentivirus production  
508 and canonical NFkappaBeta signaling by stabilizing IkappaBalpha. *PLoS Pathog* **13**,  
509 e1006187, doi:10.1371/journal.ppat.1006187 (2017).
- 510 15 Yang, L. *et al.* UBXN3B positively regulates STING-mediated antiviral immune  
511 responses. *Nat Commun* **9**, 2329, doi:10.1038/s41467-018-04759-8 (2018).
- 512 16 Silva, L. A. & Dermody, T. S. Chikungunya virus: epidemiology, replication, disease  
513 mechanisms, and prospective intervention strategies. *J Clin Invest* **127**, 737-749,  
514 doi:10.1172/JCI84417 (2017).
- 515 17 Lin, T. *et al.* CXCL10 Signaling Contributes to the Pathogenesis of Arthritogenic  
516 Alphaviruses. *Viruses* **12**, doi:10.3390/v12111252 (2020).
- 517 18 Harrison, A. G., Lin, T. & Wang, P. Mechanisms of SARS-CoV-2 Transmission and  
518 Pathogenesis. *Trends Immunol* **41**, 1100-1115, doi:10.1016/j.it.2020.10.004 (2020).
- 519 19 Sun, J. *et al.* Generation of a Broadly Useful Model for COVID-19 Pathogenesis,  
520 Vaccination, and Treatment. *Cell* **182**, 734-743 e735, doi:10.1016/j.cell.2020.06.010  
521 (2020).
- 522 20 Hassan, A. O. *et al.* A SARS-CoV-2 Infection Model in Mice Demonstrates Protection by  
523 Neutralizing Antibodies. *Cell* **182**, 744-753 e744, doi:10.1016/j.cell.2020.06.011 (2020).

- 524 21 Chen, N. *et al.* Epidemiological and clinical characteristics of 99 cases of 2019 novel  
525 coronavirus pneumonia in Wuhan, China: a descriptive study. *The Lancet* **395**, 507–513,  
526 doi:[https://doi.org/10.1016/S0140-6736\(20\)30211-7](https://doi.org/10.1016/S0140-6736(20)30211-7) (2020).
- 527 22 Guan, W.-j. *et al.* Clinical Characteristics of Coronavirus Disease 2019 in China  
528 *The New England Journal of Medicine* **382**, 1708-1720, doi:10.1056/NEJMoa2002032 (2020).
- 529 23 Imai, S. T. K. *et al.* Clinical characteristics of COVID-19 in 104 people with SARS-CoV-2  
530 infection on the Diamond Princess cruise ship: a retrospective analysis. *Lancet*  
531 *Infectious Diseases* **20**, 1043-1050 (2020).
- 532 24 Zhang, J.-j. *et al.* Clinical characteristics of 140 patients infected with SARS-CoV-2 in  
533 Wuhan, China. *Allergy* **75**, 1730-1741, doi:10.1111/all.14238 (2020).
- 534 25 Zhang, B. *et al.* Clinical characteristics of 82 cases of death from COVID-19. *PLoS ONE*  
535 **15**, doi:<https://doi.org/10.1371/journal.pone.0235458> (2020).
- 536 26 Liao, J. *et al.* Epidemiological and Clinical Characteristics of COVID-19 in Adolescents  
537 and Young Adults. *The Innovation* **1**, doi:10.1016/j.xinn.2020.04.001 (2020).
- 538 27 de Candia, P., Prattichizzo, F., Garavelli, S. & Matarese, G. T Cells: Warriors of SARS-  
539 CoV-2 Infection. *Trends Immunol* **42**, 18-30, doi:10.1016/j.it.2020.11.002 (2021).
- 540 28 Lee, J. N. *et al.* Identification of Ubx8 protein as a sensor for unsaturated fatty acids  
541 and regulator of triglyceride synthesis. *Proc Natl Acad Sci U S A* **107**, 21424-21429,  
542 doi:10.1073/pnas.1011859107 (2010).
- 543 29 Olzmann, J. A., Richter, C. M. & Kopito, R. R. Spatial regulation of UBXD8 and p97/VCP  
544 controls ATGL-mediated lipid droplet turnover. *Proc Natl Acad Sci U S A* **110**, 1345-1350,  
545 doi:10.1073/pnas.1213738110 (2013).
- 546 30 Wang, C. W. & Lee, S. C. The ubiquitin-like (UBX)-domain-containing protein  
547 Ubx2/Ubx8 regulates lipid droplet homeostasis. *Journal of cell science* **125**, 2930-2939,  
548 doi:10.1242/jcs.100230 (2012).
- 549 31 Kim, H. *et al.* UAS domain of Ubx8 and FAF1 polymerizes upon interaction with long-  
550 chain unsaturated fatty acids. *Journal of lipid research* **54**, 2144-2152,  
551 doi:10.1194/jlr.M037218 (2013).
- 552 32 Imai, N. *et al.* Hepatocyte-Specific Depletion of UBXD8 Induces Periportal Steatosis in  
553 Mice Fed a High-Fat Diet. *PLoS One* **10**, e0127114, doi:10.1371/journal.pone.0127114  
554 (2015).
- 555 33 Ohsaki, Y., Cheng, J., Fujita, A., Tokumoto, T. & Fujimoto, T. Cytoplasmic lipid droplets  
556 are sites of convergence of proteasomal and autophagic degradation of apolipoprotein B.  
557 *Mol Biol Cell* **17**, 2674-2683, doi:10.1091/mbc.e05-07-0659 (2006).
- 558 34 Ohsaki, Y., Cheng, J., Suzuki, M., Fujita, A. & Fujimoto, T. Lipid droplets are arrested in  
559 the ER membrane by tight binding of lipidated apolipoprotein B-100. *J Cell Sci* **121**,  
560 2415-2422, doi:10.1242/jcs.025452 (2008).
- 561 35 Suzuki, M. *et al.* Derlin-1 and UBXD8 are engaged in dislocation and degradation of  
562 lipidated ApoB-100 at lipid droplets. *Mol Biol Cell* **23**, 800-810, doi:10.1091/mbc.E11-11-  
563 0950 (2012).
- 564 36 Xia, Y. *et al.* Pathogenic mutation of UBQLN2 impairs its interaction with UBXD8 and  
565 disrupts endoplasmic reticulum-associated protein degradation. *Journal of*  
566 *neurochemistry* **129**, 99-106, doi:10.1111/jnc.12606 (2014).
- 567 37 Phan, V. T. *et al.* The RasGAP proteins Ira2 and neurofibromin are negatively regulated  
568 by Gpb1 in yeast and ETEA in humans. *Mol Cell Biol* **30**, 2264-2279,  
569 doi:10.1128/mcb.01450-08 (2010).
- 570 38 Zhou, H. L., Geng, C., Luo, G. & Lou, H. The p97-UBXD8 complex destabilizes mRNA  
571 by promoting release of ubiquitinated HuR from mRNP. *Genes & development* **27**, 1046-  
572 1058, doi:10.1101/gad.215681.113 (2013).

- 573 39 Glinka, T. *et al.* Signal-peptide-mediated translocation is regulated by a p97-AIRAPL  
574 complex. *The Biochemical journal* **457**, 253-261, doi:10.1042/bj20130710 (2014).
- 575 40 Geng, T. *et al.* A critical role for STING signaling in limiting pathogenesis of Chikungunya  
576 virus. *J Infect Dis*, doi:10.1093/infdis/jjaa694 (2020).
- 577 41 McGuckin Wuertz, K. *et al.* STING is required for host defense against neuropathological  
578 West Nile virus infection. *PLoS Pathog* **15**, e1007899, doi:10.1371/journal.ppat.1007899  
579 (2019).
- 580 42 Zidar, D. A. *et al.* Association of Lymphopenia With Risk of Mortality Among Adults in the  
581 US General Population. *JAMA Netw Open* **2**, e1916526,  
582 doi:10.1001/jamanetworkopen.2019.16526 (2019).
- 583 43 Conley, M. E. *et al.* Primary B cell immunodeficiencies: comparisons and contrasts.  
584 *Annu Rev Immunol* **27**, 199-227, doi:10.1146/annurev.immunol.021908.132649 (2009).
- 585 44 Yong, P. F., Thaventhiran, J. E. & Grimbacher, B. "A rose is a rose is a rose," but CVID  
586 is Not CVID common variable immune deficiency (CVID), what do we know in 2011?  
587 *Adv Immunol* **111**, 47-107, doi:10.1016/B978-0-12-385991-4.00002-7 (2011).
- 588 45 Chang, A. Y. *et al.* Chikungunya Arthritis Mechanisms in the Americas: A Cross-  
589 Sectional Analysis of Chikungunya Arthritis Patients Twenty-Two Months After Infection  
590 Demonstrating No Detectable Viral Persistence in Synovial Fluid. *Arthritis Rheumatol* **70**,  
591 585-593, doi:10.1002/art.40383 (2018).
- 592 46 He, X. *et al.* Temporal dynamics in viral shedding and transmissibility of COVID-19. *Nat*  
593 *Med* **26**, 672-675, doi:10.1038/s41591-020-0869-5 (2020).
- 594 47 Liu, J. *et al.* Neutrophil-to-lymphocyte ratio predicts critical illness patients with 2019  
595 coronavirus disease in the early stage. *J Transl Med* **18**, 206, doi:10.1186/s12967-020-  
596 02374-0 (2020).
- 597 48 Guo, X. *et al.* Neutrophil:lymphocyte ratio is positively related to type 2 diabetes in a  
598 large-scale adult population: a Tianjin Chronic Low-Grade Systemic Inflammation and  
599 Health cohort study. *Eur J Endocrinol* **173**, 217-225, doi:10.1530/EJE-15-0176 (2015).
- 600 49 Angkananard, T., Anothaisintawee, T., McEvoy, M., Attia, J. & Thakkinstian, A.  
601 Neutrophil Lymphocyte Ratio and Cardiovascular Disease Risk: A Systematic Review  
602 and Meta-Analysis. *Biomed Res Int* **2018**, 2703518, doi:10.1155/2018/2703518 (2018).
- 603 50 Li, J. *et al.* Neutrophil-to-Lymphocyte Ratio Positively Correlates to Age in Healthy  
604 Population. *J Clin Lab Anal* **29**, 437-443, doi:10.1002/jcla.21791 (2015).
- 605 51 Schwantes-An, T. H. *et al.* Genome-wide association study and meta-analysis on  
606 alcohol-related liver cirrhosis identifies novel genetic risk factors. *Hepatology*,  
607 doi:10.1002/hep.31535 (2020).
- 608 52 Gorchakov, R. *et al.* Attenuation of Chikungunya virus vaccine strain 181/clone 25 is  
609 determined by two amino acid substitutions in the E2 envelope glycoprotein. *J Virol* **86**,  
610 6084-6096, doi:10.1128/JVI.06449-11 (2012).
- 611 53 Tretyakova, I., Hearn, J., Wang, E., Weaver, S. & Pushko, P. DNA vaccine initiates  
612 replication of live attenuated chikungunya virus in vitro and elicits protective immune  
613 response in mice. *J Infect Dis* **209**, 1882-1890, doi:10.1093/infdis/jiu114 (2014).
- 614 54 Wang, P. *et al.* Caspase-12 controls West Nile virus infection via the viral RNA receptor  
615 RIG-I. *Nat Immunol* **11**, 912-919, doi:10.1038/ni.1933 (2010).
- 616 55 Yang, L. *et al.* Macrophage scavenger receptor 1 controls Chikungunya virus infection  
617 through autophagy in mice. *Commun Biol* **3**, 556, doi:10.1038/s42003-020-01285-6  
618 (2020).

619  
620

621 **FIGURE LEGEND**

622

623

624 **Fig.1 UBXN3B is essential for controlling SARS-CoV-2 and influenza pathogenesis. a-d)**

625 Sex-and-age matched mice were administered  $2 \times 10^5$  plaque forming units (PFU) of SARS-CoV-

626 2 intranasally. **a)** Percentage changes in the body mass of mock-treated Cre<sup>+</sup> Ubxn3b<sup>fl<sup>ox</sup>/fl<sup>ox</sup></sup>

627 (designated *Ubxn3b*<sup>+/+</sup>) and tamoxifen (TMX) -treated Cre<sup>+</sup> Ubxn3b<sup>fl<sup>ox</sup>/fl<sup>ox</sup></sup> (designated *Ubxn3b*<sup>-/-</sup>)

628 littermates, during the course of SARS-CoV-2 infection. Data point: mean  $\pm$  s.e.m, N=6-8. \*,

629  $p < 0.05$ ; \*\*,  $p < 0.01$ ; \*\*\*,  $p < 0.001$  (two-tailed Student's *t*-test). **b)** Representative micrographs of

630 hematoxylin and eosin staining (H&E) of lung sections from mock or SARS-CoV-2 infected mice

631 on day 3 and 10 post infection (p.i.). The green arrow points to a cluster of immune infiltrates.

632 The red arrow indicates a cluster of brownish cells of hemosiderosis. Magnification 400 x. **c)**

633 Iron-staining (blue) of lung sections from mock or SARS-CoV-2 infected mice on days 3 and 10

634 p.i. Black arrows point to iron laden cells. Mock: mock infected. N=2 (mock), 4 (Day 3), 7 (Day

635 10), 3 (Day 35) per genotype. **e, f)** Sex-and-age matched mice were administered 350 CCID<sub>50</sub>

636 (cell culture infectious dose 50% assay) influenza A PR/8/34 H1N1 intranasally. **e)** The

637 percentage of the body mass relative to day 0 (weighed immediately before infection). Data

638 point: mean  $\pm$  s.e.m. N= 5-6. **f)** The survival curve. N=6 per genotype. P=0.02 (Log-Rank test).

639

640 **Fig.2 UBXN3B is essential for controlling SARS-CoV-2 pathogenesis.** Sex-and-age

641 matched mice were administered  $2 \times 10^5$  plaque forming units (PFU) of SARS-CoV-2 intranasally.

642 **a)** Quantitative RT-PCR (qPCR) quantification of SARS-CoV-2 loads in the lung on days 3 and

643 10 post infection (p.i.). Data point: mean  $\pm$  s.e.m, N=8 per group for day 3 and 6 for day 10. **b)**

644 Quantification of serum immune mediators by multiplex ELISA during the course of SARS-CoV-

645 2 infection. Each symbol= one mouse, the small horizontal line: the median of the result. \*,



646  $P < 0.05$ ; \*\*,  $P < 0.01$  (non-parametric Mann-Whitney test) between *Ubxn3b*<sup>+/+</sup> and *Ubxn3b*<sup>-/-</sup>  
647 littermates at the same time point.

648

649 **Fig.3 UBXN3B is essential for immune cell homeostasis during SARS-CoV-2 infection.**

650 Sex-and-age matched mice were administered  $2 \times 10^5$  plaque forming units (PFU) of SARS-CoV-  
651 2 intranasally. **a)** The total CD45<sup>+</sup> cells, **b)** the percentage (relative to CD45<sup>+</sup> cells) of various  
652 immune cell populations quantified by FACS, **c)** the neutrophil-to-T cell ratio, in one lung of  
653 SARS-CoV-2 infected mice on day 3 post infection (p.i.). **d)** The percentage (relative to CD45<sup>+</sup>  
654 cells) of various immune cell populations, and **e)** the neutrophil-to-B/T cell ratios (N/B, N/T), in  
655 the blood on day 3 post infection (p.i.). The cell counts and percentage of various immune cell  
656 populations **f)** and **g)** the neutrophil-to-B/T cell ratios in one lung, **h)** cell counts in the blood on  
657 day 35 p.i. Neu: neutrophil, Mac/Mono: macrophage/monocyte, DC: dendritic cell. Each  
658 symbol=one mouse. \*,  $p < 0.05$ ; \*\*,  $p < 0.01$ ; \*\*\*,  $p < 0.001$  (non-parametric Mann-Whitney test).  
659 The horizontal line indicates the median of the result.

660

661 **Fig.4 UBXN3B is essential for restricting pathogenesis of CHIKV arthritis.** Sex-and-age

662 matched littermates were administered  $1 \times 10^5$  plaque forming units (PFU) of CHIKV  
663 subcutaneously in one footpad. **a)** Representative images of foot swelling (n=3 animals). The  
664 red arrows indicate the foot inoculated with CHIKV. **b)** Fold changes in the footpad dimensions  
665 of infected mice over uninfected (day 0). Data point: mean  $\pm$  s.e.m (n=3 mice per genotype).  
666 **c)** Representative micrographs of hematoxylin and eosin staining of ankle joints on day 16 post  
667 CHIKV infection (p.i.) [N=10 *Ubxn3b*<sup>+/+</sup>, 5 *Ubxn3b*<sup>-/-</sup> animals]. B: bone, T: tendon, M: muscle.  
668 Magnification: 200 x. **d)** The arbitrary scores of ankle joint inflammation and damage using  
669 scales of 1 to 5, with 5 representing the worst disease presentation. **e)** The percentage (relative  
670 to CD45<sup>+</sup> cells) of various immune cell populations quantified by FACS, and **f)** the neutrophil to  
671 B/T cell ratios, in the CHIKV-inoculated footpad, the spleen and blood circulation on day 7 post

672 infection (p.i.). Neu: neutrophil, Mac/Mono: macrophage/monocyte, DC: dendritic cell. Each  
673 symbol=one mouse. The horizontal line indicates the median of the result. \*,  $p<0.05$ ; \*\*,  $p<0.01$ ;  
674 \*\*\*,  $p<0.001$  (two-tailed Student's t-test for panel **b**, **d**; non-parametric Mann-Whitney test for  
675 panel **e**, **f**).

676

677 **Fig.5 UBXN3B is essential for steady-state immune cell homeostasis.** The percentage  
678 (relative to CD45<sup>+</sup> cells) of various immune cell populations, cell counts, and the neutrophil to  
679 B/T cell ratios, were quantified by FACS in the **a**) blood and **b**) spleen of specific pathogen-free  
680 mice. Neu: neutrophil, Mac/Mono: macrophage/monocyte, DC: dendritic cell, Mast: mast cell,  
681 Eos: eosinophil, NK: natural killer, NKT: natural killer T cells. Each symbol=one mouse. The  
682 horizontal line indicates the median of the result. \*,  $p<0.05$ ; \*\*,  $p<0.01$ ; \*\*\*,  $p<0.001$  (two-tailed  
683 Student's t-test).

684

685 **Fig.6 UBXN3B is essential for hematopoietic hemostasis.** The **a**) gating strategy and **b**)  
686 frequencies (relative to live cells after lysis of red blood cells) of various mature immune cells,  
687 the **c**) gating plan and **d**) frequencies of stem cells/progenitors, in the bone marrows of specific  
688 pathogen-free mice. BM: bone marrow, Neu: neutrophil, Mono: monocyte, DC: dendritic cell, NK:  
689 natural killer, LSK: Lin<sup>-</sup> Sca<sup>+</sup> Kit<sup>+</sup>, LT-HSC: long-term hematopoietic stem cell, ST-HSC: short-  
690 term multipotent HSC (also known as MPP), CMP: common myeloid progenitor, CLP: common  
691 lymphoid progenitor, GMP: granulocyte-macrophage progenitor, MEP: megakaryocyte-  
692 erythroid progenitor, ProB: progenitor B, PreB: precursor B, ImmB: immature B. Each  
693 symbol=one mouse. The horizontal line indicates the median of the result. \*,  $p<0.05$ ; \*\*,  $p<0.01$ ;  
694 \*\*\*,  $p<0.001$  (two-tailed Student's t-test).

695

## 696 **Supplemental Materials**

697 Supplemental Fig. 1-6

698 Supplemental Movie 1: SARS-CoV-2-infected *Ubxn3b*<sup>+/+</sup> mice on day 2 after infection.  
699  
700 Supplemental Movie 2: SARS-CoV-2-infected *Ubxn3b*<sup>-/-</sup> mice on day 2 after infection.  
701

**Fig.1**

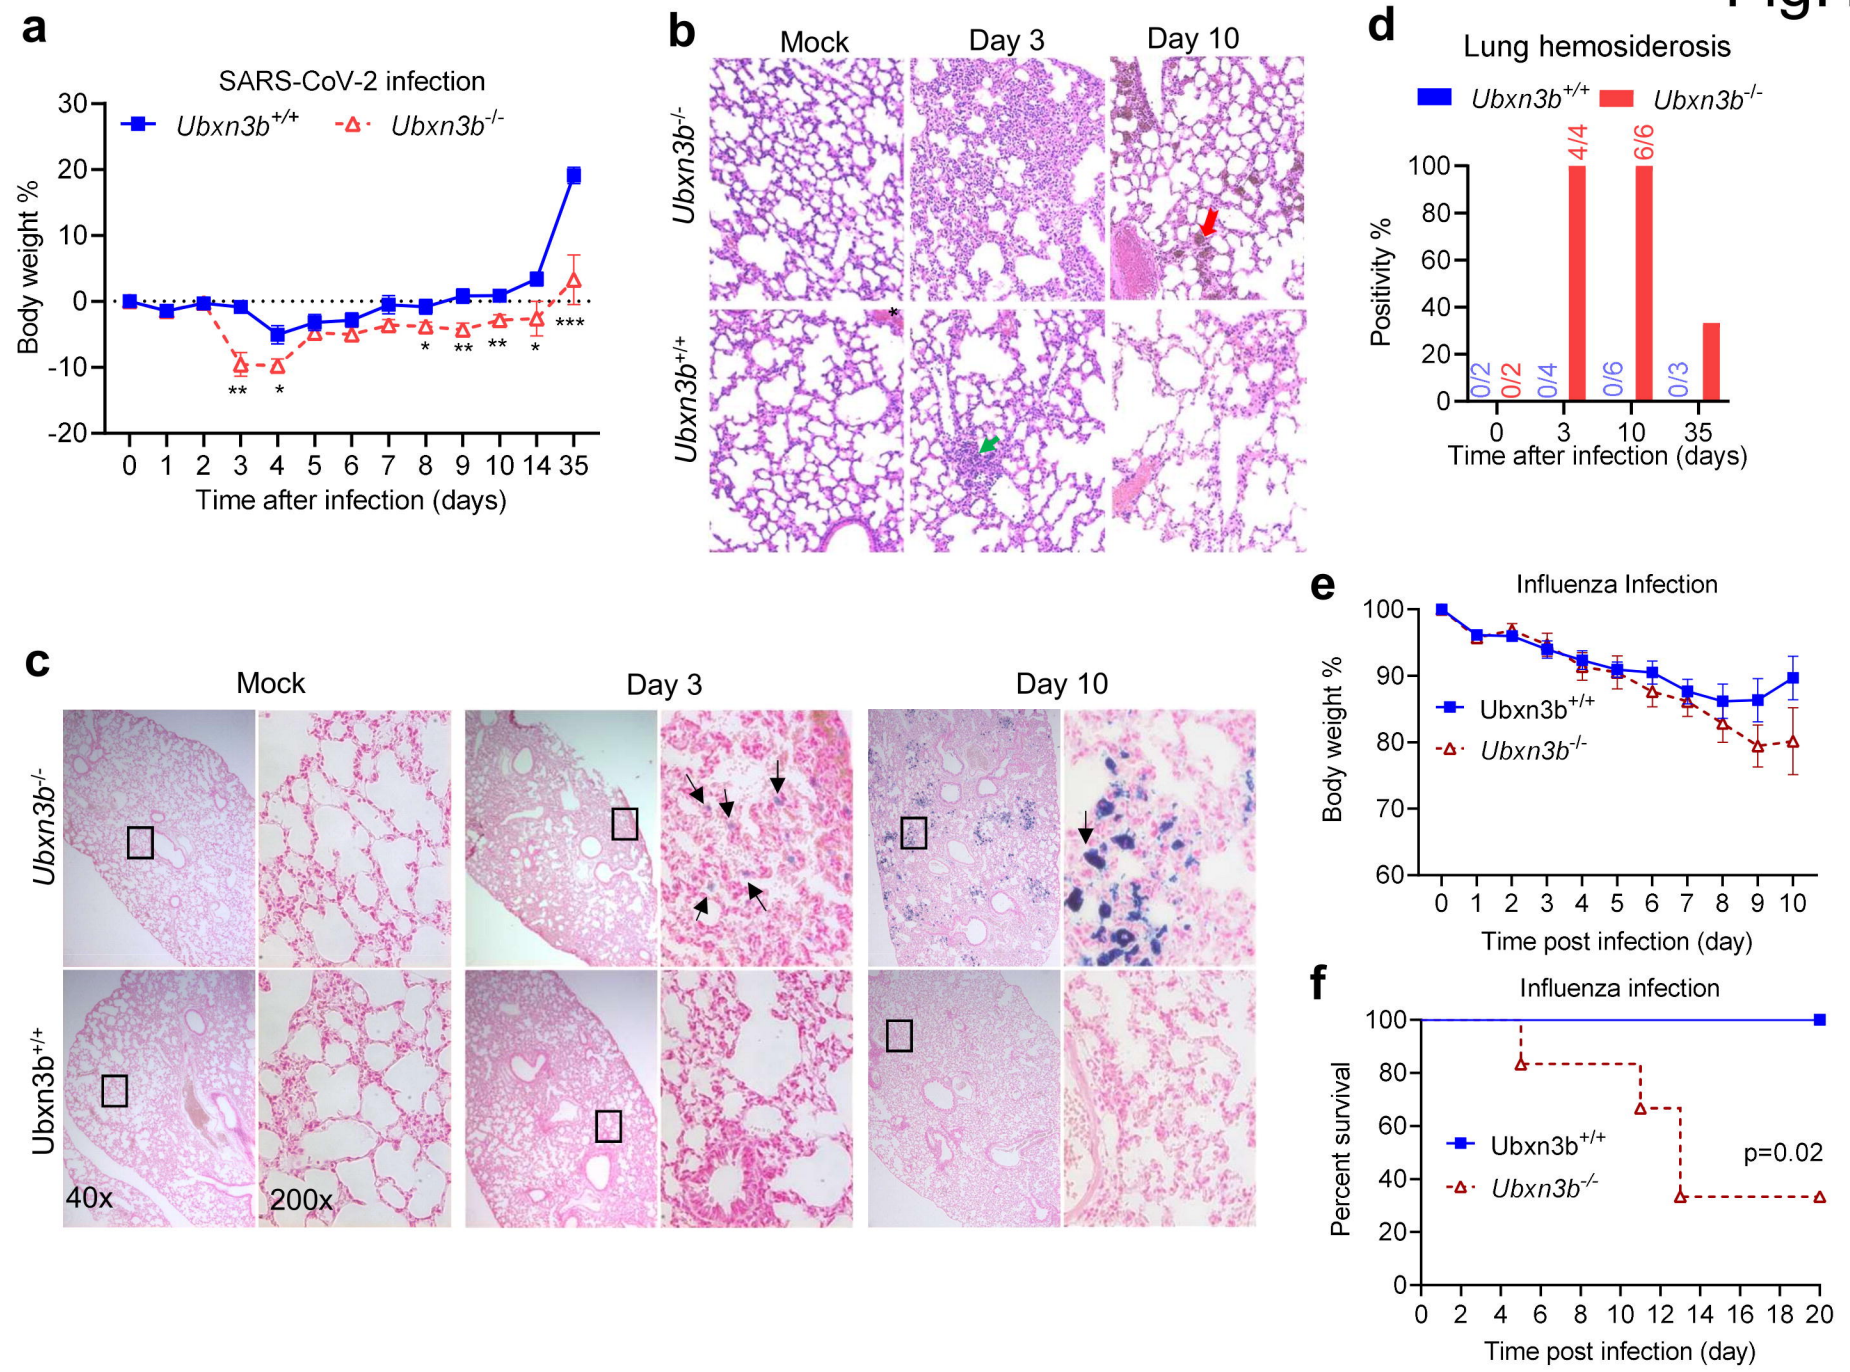

Fig.2

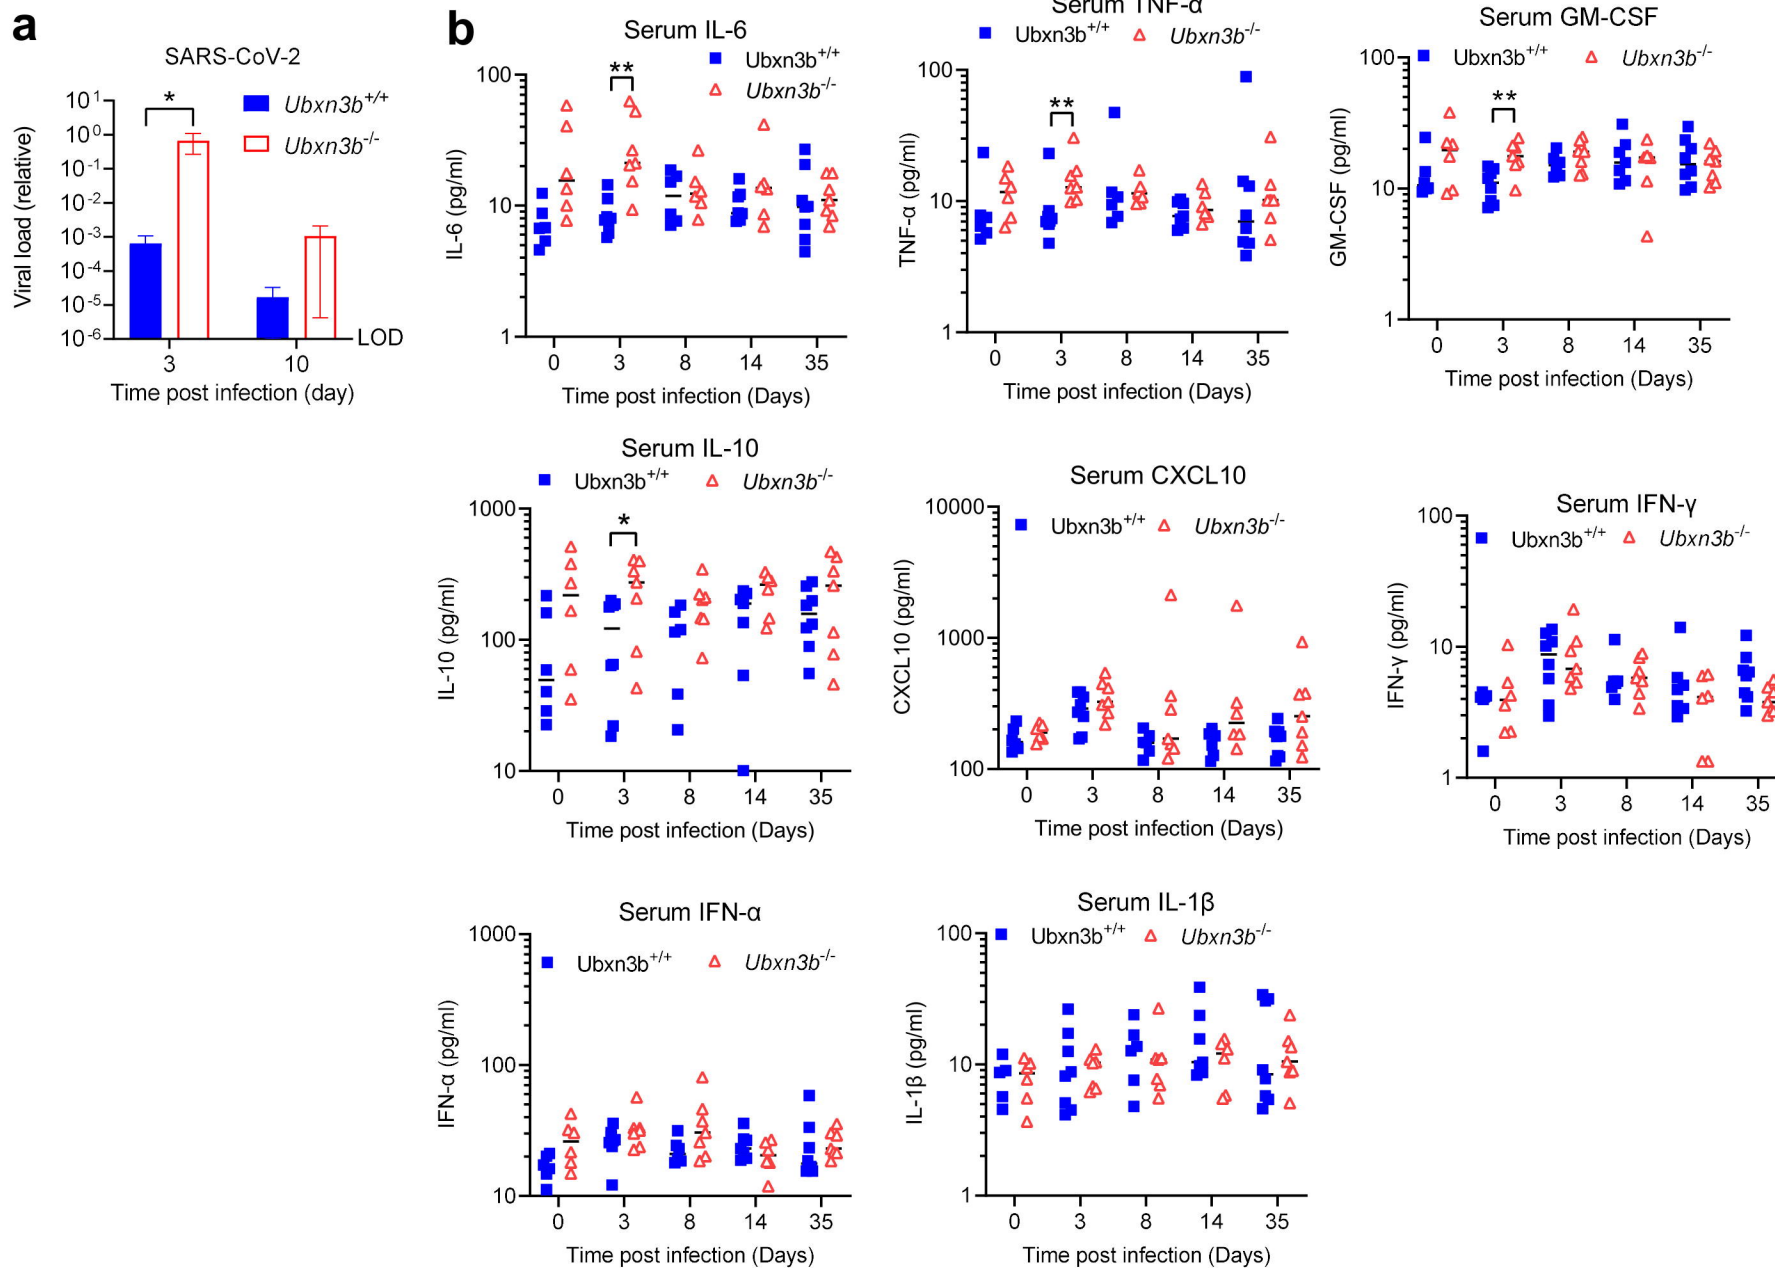

Fig.3

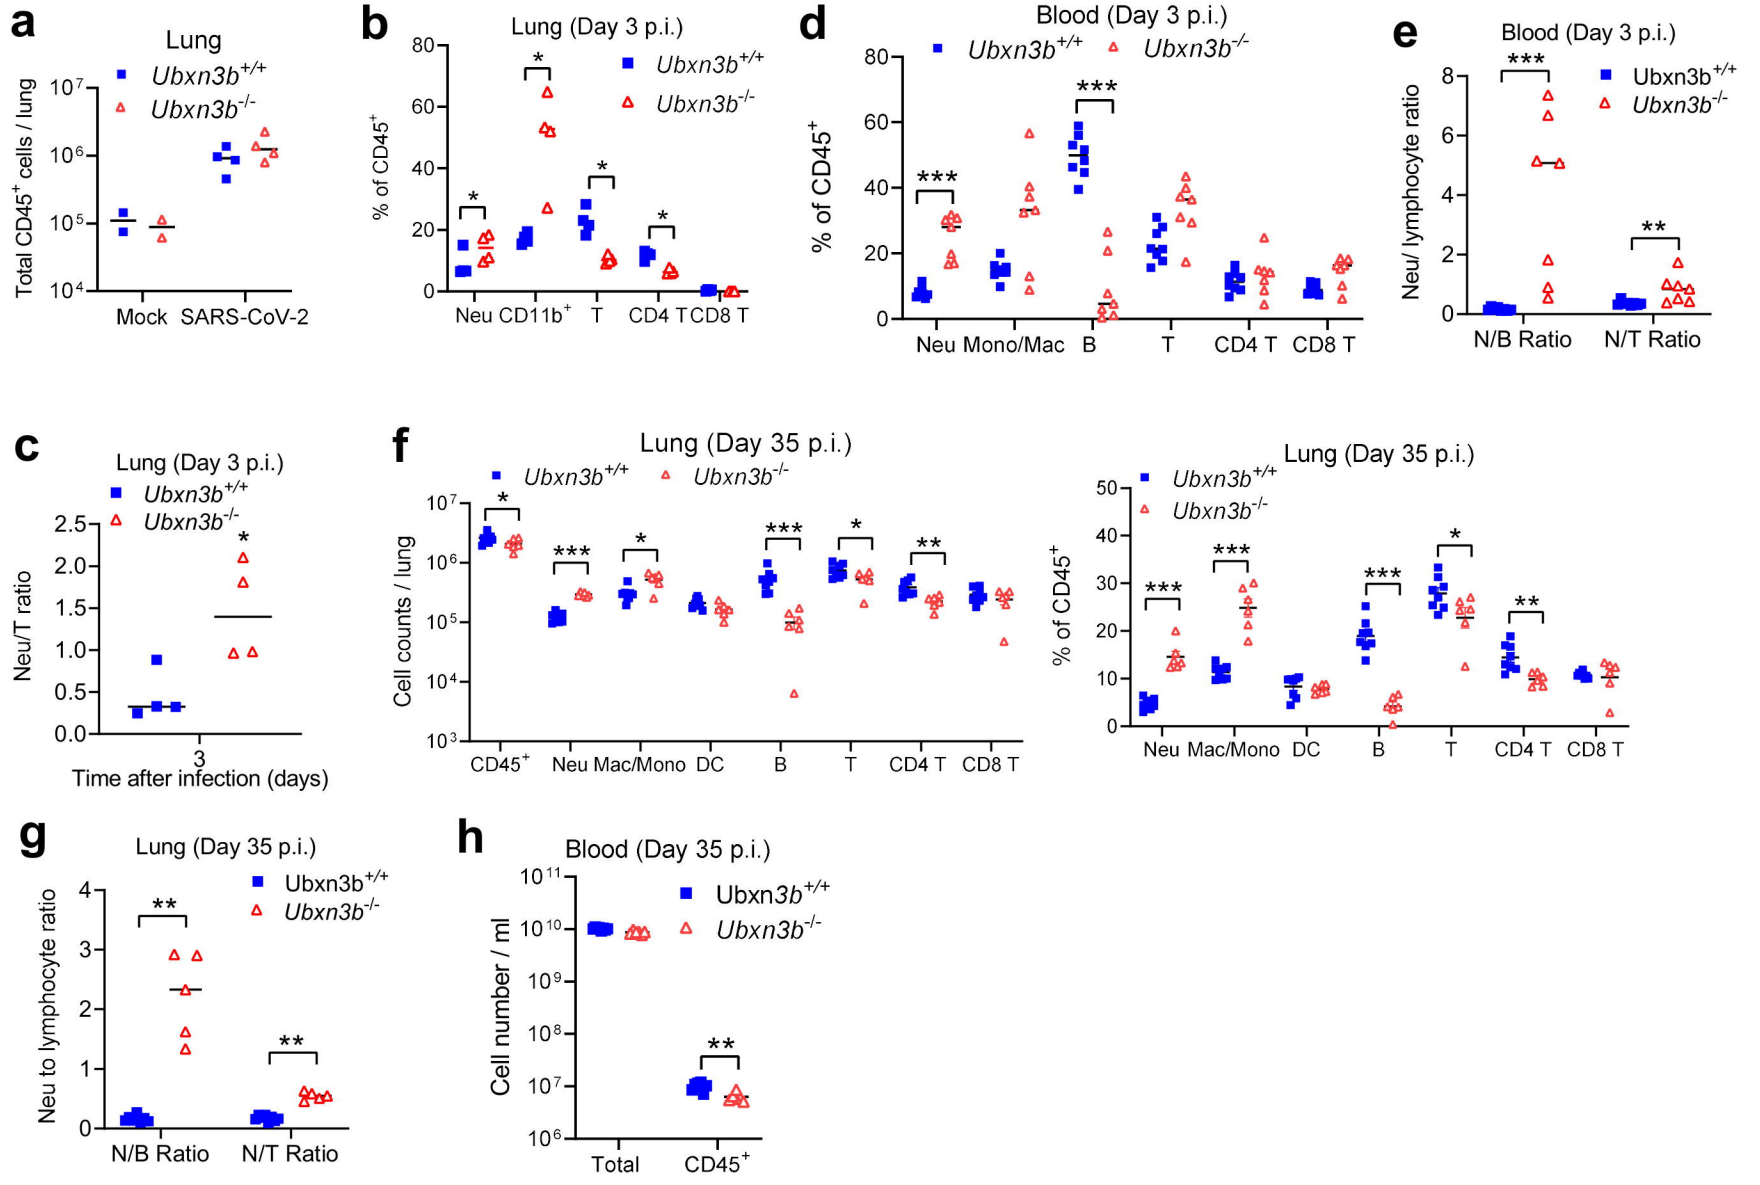

Fig.4

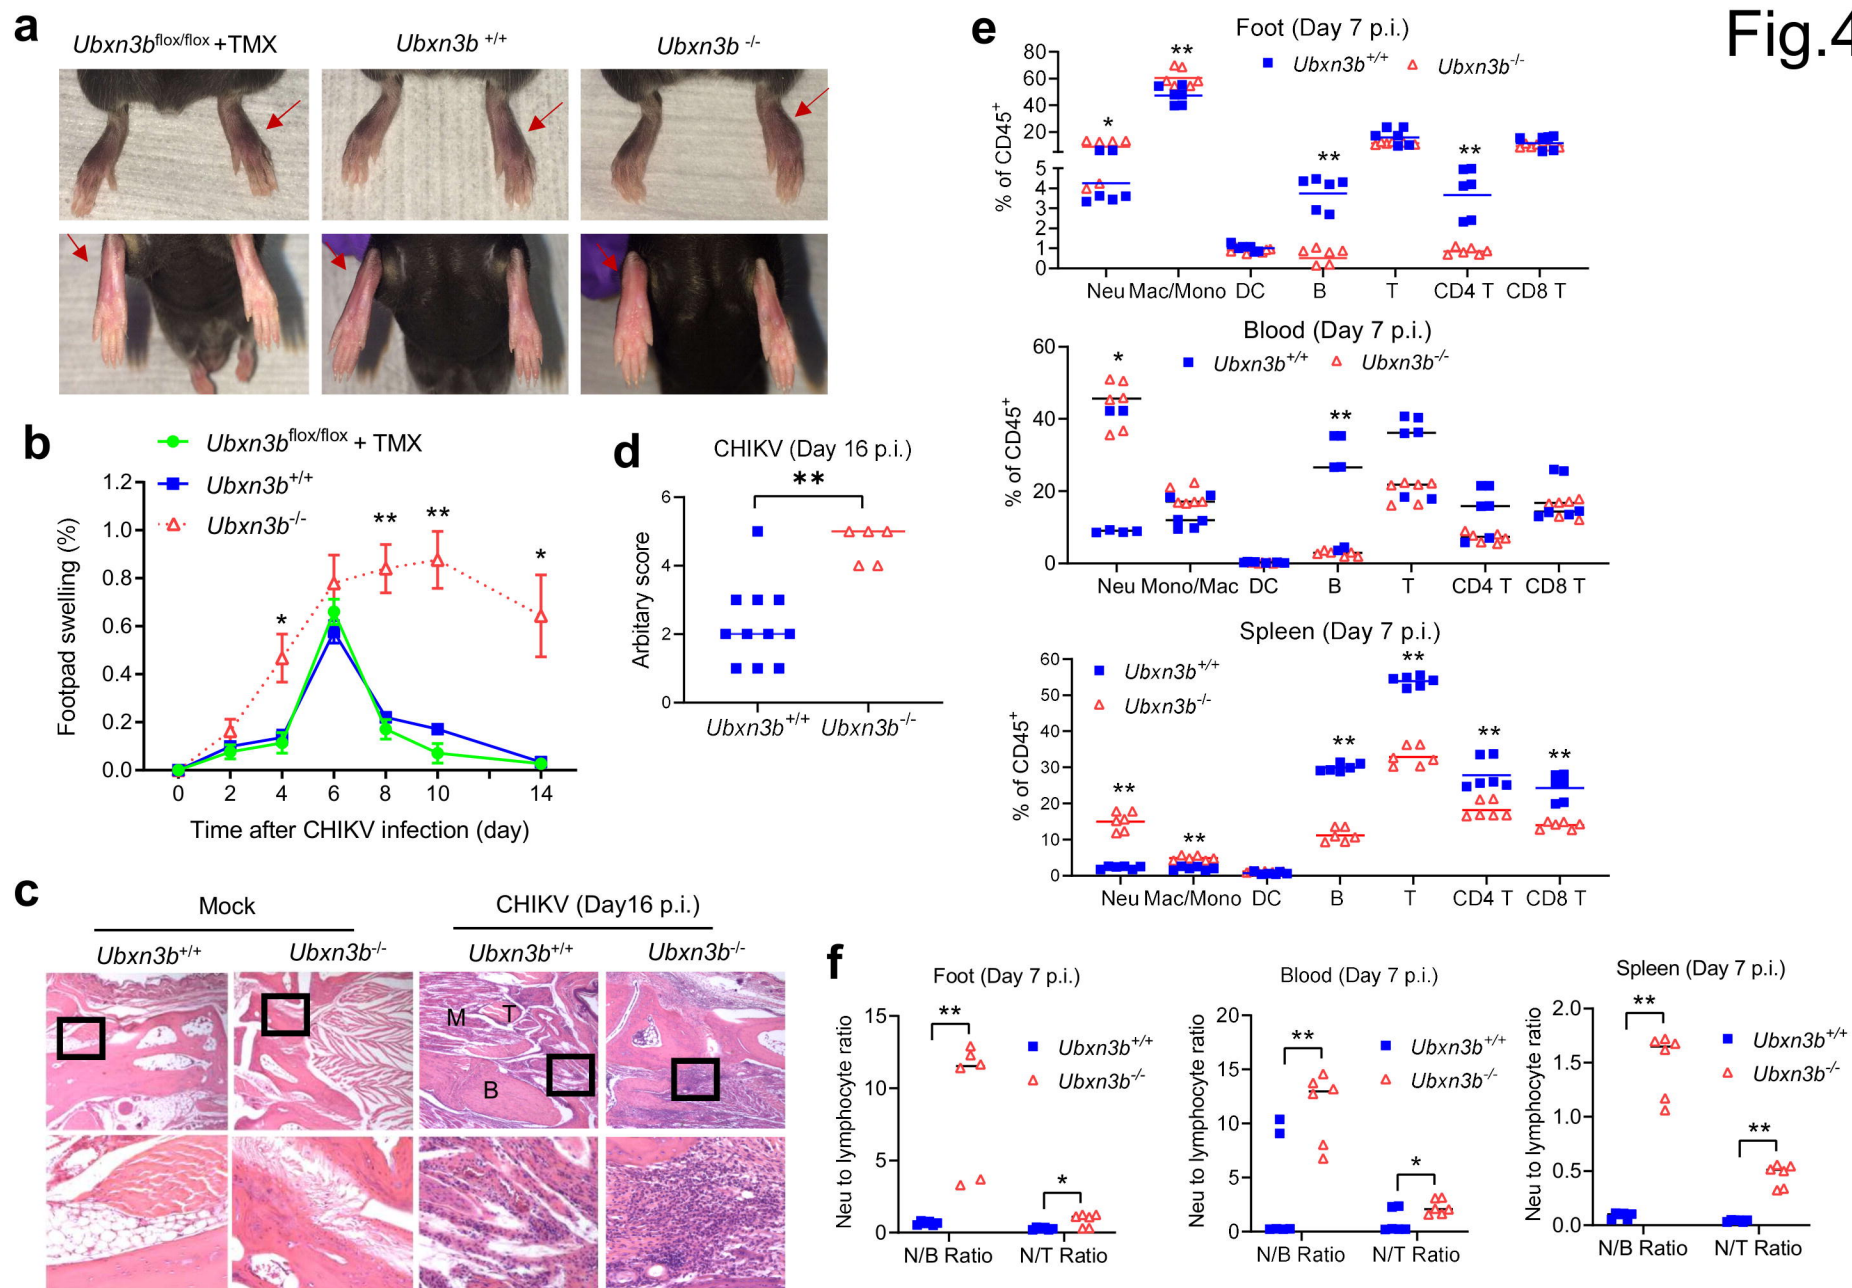

Fig.5

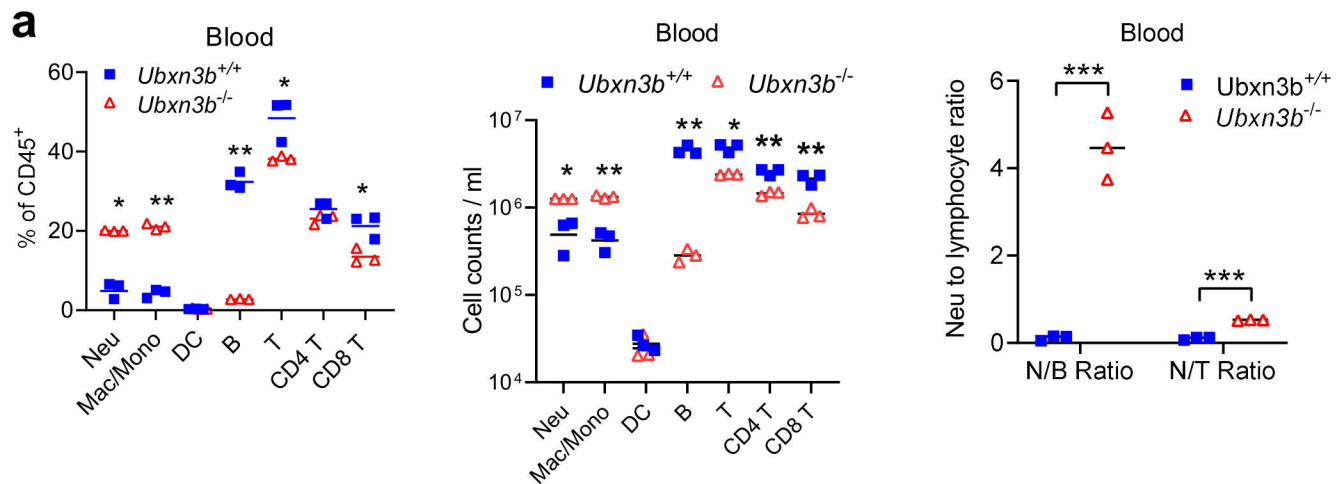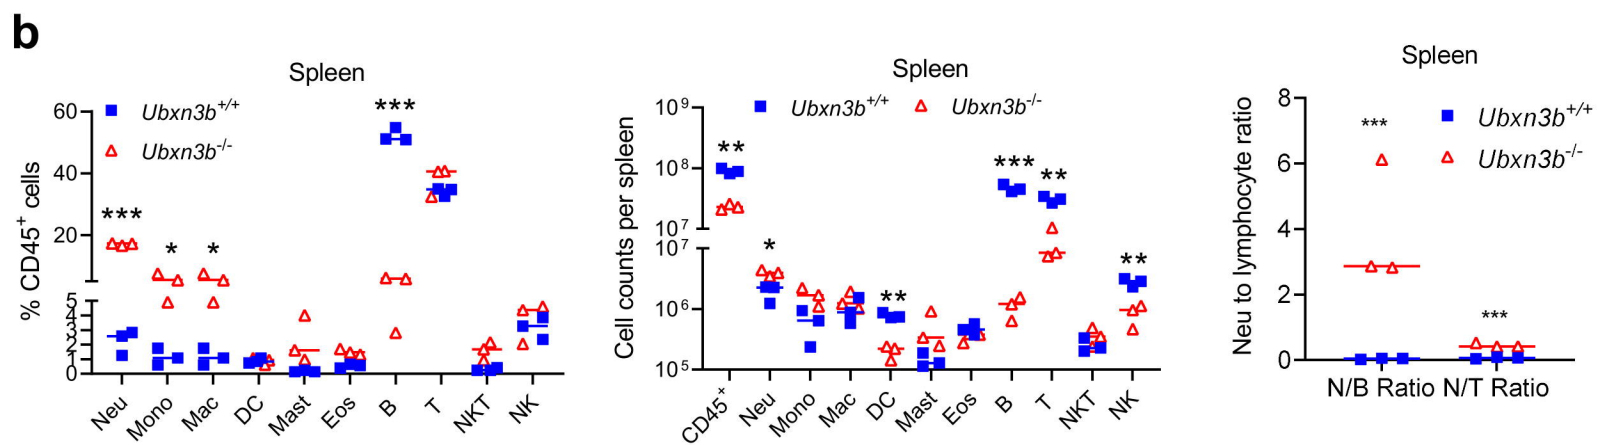



Fig.6

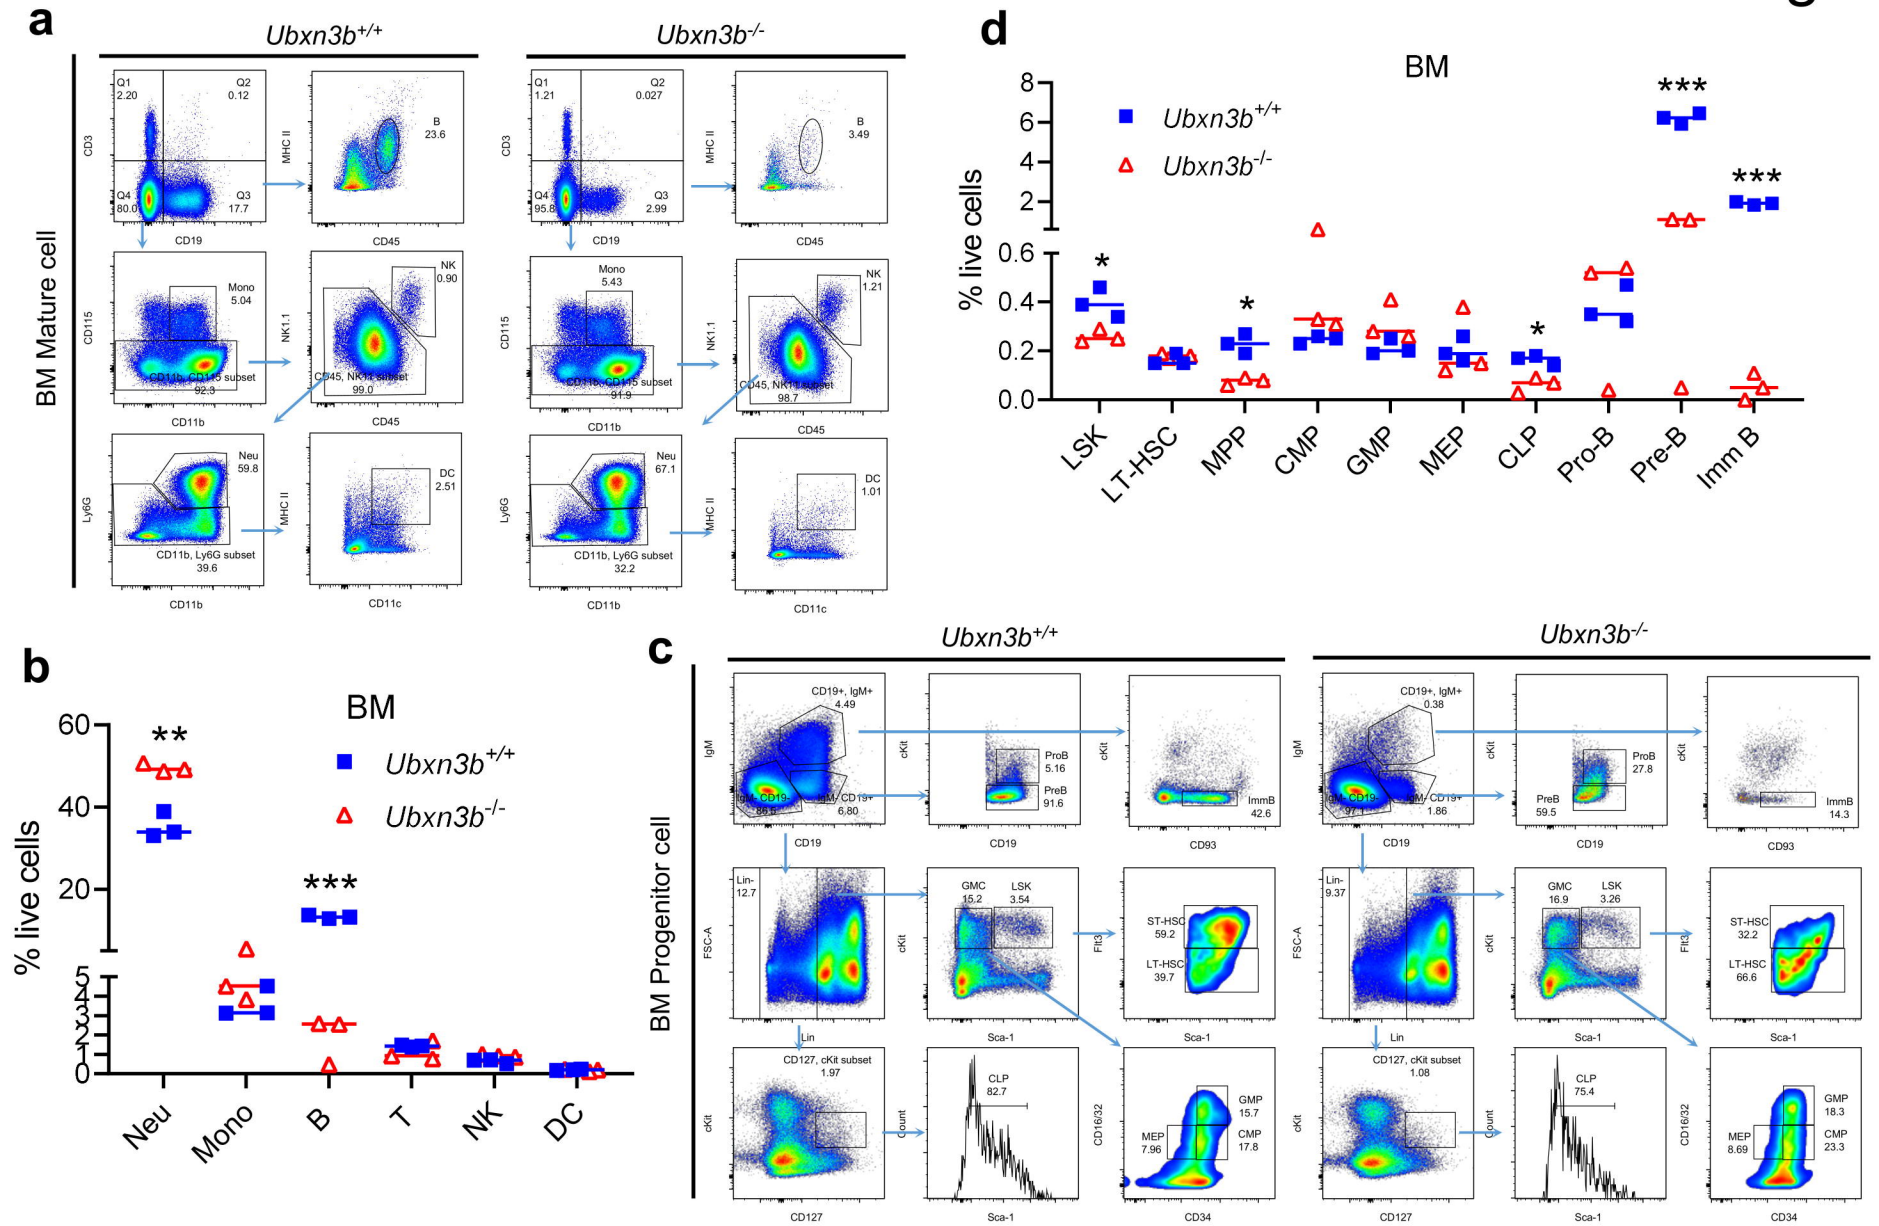

Source: https://biorxiv.org/content/10.1101/2021.03.04.433919v1.full.pdf
