1 **An Essential Role of UBXN3B in B Lymphopoiesis**

2  
3 Tingting Geng<sup>1\*</sup>, Duomeng Yang<sup>1\*</sup>, Tao Lin<sup>1</sup>, Andrew G. Harrison<sup>1</sup>, Binsheng Wang<sup>2</sup>, Blake  
4 Torrance<sup>1</sup>, Kepeng Wang<sup>1</sup>, Yanlin Wang<sup>3</sup>, Long Yang<sup>4</sup>, Laura Haynes<sup>1</sup>, Gong Cheng<sup>5</sup>, Anthony  
5 T. Vella<sup>1</sup>, Erol Fikrig<sup>6</sup> and Penghua Wang<sup>1#</sup>

6  
7 <sup>1</sup>Department of Immunology, <sup>2</sup>Center on Aging and Department of Genetics and Genome  
8 Sciences, <sup>3</sup>Department of Medicine, School of Medicine, UConn Health, Farmington, CT 06030,  
9 USA.

10 <sup>4</sup>School of integrative Medicine, Tianjin University of Traditional Chinese Medicine, Tianjin  
11 301617, China.

12 <sup>5</sup>Department of Basic Sciences, School of Medicine, Tsinghua University, Beijing, China.

13 <sup>6</sup>Section of Infectious Diseases, Yale University School of Medicine, 333 Cedar Street, New  
14 Haven, CT, 06510, USA

15  
16 \* T.G. and D.Y contributed equally.

17  
18 # Address correspondence to: Penghua Wang, Ph.D., Department of Immunology, School of  
19 Medicine, University of Connecticut, UConn Health, Farmington, CT 06030, USA. Email:  
20 [pewang@uchc.edu](mailto:pewang@uchc.edu), Tel: 860-679-6393.

21  
22 Running title: UBXN3B controls B lymphopoiesis

25 **ABSTRACT**

26  
27 Hematopoiesis is finely regulated to enable timely production of the right numbers and types of  
28 mature immune cells to maintain tissue homeostasis. Dysregulated hematopoiesis may  
29 compromise antiviral immunity and/or exacerbate immunopathogenesis. Herein, we report an  
30 essential role of UBXN3B in maintenance of hematopoietic homeostasis and restriction of  
31 immunopathogenesis during respiratory viral infection. *Ubxn3b* deficient (*Ubxn3b*<sup>-/-</sup>) mice are  
32 highly vulnerable to SARS-CoV-2 and influenza A infection, characterized by more severe lung  
33 immunopathology, lower virus-specific IgG, significantly fewer B cells, but more myeloid cells  
34 than *Ubxn3b*<sup>+/+</sup> littermates. This aberrant immune compartmentalization is recapitulated in  
35 uninfected *Ubxn3b*<sup>-/-</sup> mice. Mechanistically, UBXN3B controls precursor B-I (pre-BI) transition to  
36 pre-BII and subsequent proliferation in a cell-intrinsic manner, by maintaining BLNK protein  
37 stability and pre-BCR signaling. These results reveal an essential role of UBXN3B for the early  
38 stage of B cell development.

39

40 Key word: UBXN, FAF2, hematopoiesis, B lymphopoiesis, SARS-CoV-2.

41

42

43 **INTRODUCTION**

44

45 The immune system is comprised of various cell types that coordinate responses to infection,  
46 maintain tissue and immune homeostasis. Peripheral immune cells, with the exception of a few  
47 cell types such as long-lived memory T cells and some tissue macrophages, are constantly  
48 replenished from bone marrow stem cells through progenitor cells <sup>1</sup>. For instance, approximately  
49  $0.5-1 \times 10^{11}$  granulocytes are generated daily in adult human individuals <sup>2</sup>. The hematopoietic  
50 system is a hierarchically organized, somatic stem cell-maintained organ system, with long-lived  
51 and self-renewing pluripotent hematopoietic stem cells (LT-HSCs) at its apex <sup>1</sup>. LT-HSCs  
52 differentiate into short-term multipotent progenitors (MPPs or ST-HSCs) and lineage-committed  
53 hematopoietic progenitors, which in turn will eventually differentiate into the numerous mature  
54 blood cell lineages <sup>3</sup>. While at the apex of the hematopoietic hierarchy, LT-HSCs are largely  
55 quiescent, and the highly proliferative MPPs are the primary contributor to steady-state  
56 hematopoiesis <sup>4 5</sup>. MPPs are capable of differentiating into lineage-committed progenitors, e.g.,  
57 common lymphoid progenitors (CLPs) and common myeloid progenitors (CMP), which turn into  
58 blast cells leading to specific cell types. Among hematopoiesis, B cell development is the best  
59 studied, with several stages clearly defined, including pre-progenitor (pre-pro) B, precursor B I  
60 (pre-BI), large pre-BII, small pre-BII and immature B (imm-B) inside bone marrow. In bone  
61 marrow, pre-BI transition to large pre-BII is considered an essential checkpoint, involving  
62 rearrangement of variable (V)/diversity (D)/joining (J) gene segments by recombination  
63 activating genes (RAG1/2) and assembly of pre-B cell receptor (pre-BCR) with a surrogate light  
64 chain (SLC) and immunoglobulin (Ig)  $\mu$  heavy chain ( $\mu$ H) on cell surface. Pre-BI cells without a  
65 functional pre-BCR undergo apoptosis. Once passing the first quality check, pre-BI becomes  
66 large pre-BII, which proliferates several rounds and turn into small pre-BII. At this stage, small

67 pre-BII no longer expresses SLC, but begins expressing an Ig light chain  $\kappa$  or  $\lambda$  that forms a  
68 BCR together with  $\mu$ H, and becomes imm-B (checkpoint 2). Imm-B cells exit bone marrow and  
69 mature in the peripheral immune organs such as spleen and lymph node <sup>6</sup>. This process is  
70 controlled by a unique set of cell-intrinsic transcription factors and cell-extrinsic factors such as  
71 cytokines, chemokines and growth factors in its bone marrow niche <sup>3</sup>.

72  
73 The human genome encodes 13 ubiquitin regulatory X (UBX) domain-containing proteins,  
74 designated UBXNs. The UBX domain shares weak homology with ubiquitin but adopts the same  
75 three dimensional fold as ubiquitin <sup>7</sup>. Many UBXNs are capable of binding multiple E3 ubiquitin  
76 ligases and p97 (also known as VCP), an ATPase associated with various cellular activities  
77 (AAA ATPase) <sup>8,9</sup>. However, the physiological functions of UBXNs remain poorly characterized.  
78 We and other research groups have recently shown that several UBXNs regulate viral RNA-  
79 sensing RIG-I (retinoic acid inducible gene 1) like receptor -mitochondrial antiviral viral signaling  
80 (RLR-MAVS) <sup>10-12</sup> and Nuclear factor- $\kappa$ B (NF- $\kappa$ B) signaling pathways <sup>13,14</sup>. Of note, we recently  
81 reported that UBXN3B controls a DNA virus infection by positively regulating the dsDNA-  
82 sensing cGAS (cyclic di-GMP-AMP synthase)-STING (stimulator-of-interferon-genes) signaling  
83 and innate immunity <sup>15</sup>. However, the physiological function of UBXN3B in RNA virus infection  
84 remains unknown. To this end, we will study two important respiratory viruses, including one  
85 positive-sense single-stranded RNA [(+) ssRNA] severe acute respiratory syndrome (COVID-  
86 19)-causing coronavirus 2 (SARS-CoV-2), and a negative-sense single-stranded RNA [(-)  
87 ssRNA] influenza A virus (IAV). Both viruses induce life-threatening lung immunopathology,  
88 typified by elevated levels of inflammatory mediators, myeloid immune infiltrates in the lung,  
89 neutrophilia and lymphopenia<sup>16 17</sup>. Herein, we report that *Ubxn3b* deficient (*Ubxn3b*<sup>-/-</sup>) mice are

90 highly vulnerable to SARS-CoV-2 and IAV infection, typified by higher viral loads and  
91 inflammatory mediators, more severe immunopathology in the lung, but lower virus-specific  
92 immunoglobulin (Ig) G and slower resolution of disease, when compared to *Ubxn3<sup>+/+</sup>* littermates.  
93 Of note, SARS-CoV-2 infected *Ubxn3b<sup>-/-</sup>* mice have lower B/T cell counts, while more myeloid  
94 cells, and consequently a higher neutrophil-to-lymphocyte ratio (N/L) in the lung and blood.  
95 Intriguingly, this abnormal immune compartmentalization is also recapitulated in uninfected  
96 *Ubxn3b<sup>-/-</sup>* mice when compared to *Ubxn3b<sup>+/+</sup>* littermates. Reciprocal bone marrow  
97 transplantation reveals that the B cell defect in *Ubxn3b<sup>-/-</sup>* is cell-intrinsic. Mechanistically,  
98 UBXN3B controls precursor B-I (pre-BI) transition to pre-BII and subsequent proliferation in a  
99 cell-intrinsic manner, by maintaining BLNK protein stability and pre-BCR signaling.

100

## 101 **RESULTS**

102

### 103 **UBXN3B restricts pathogenesis of respiratory viruses**

104 We have long been interested in UBXNs because of their potential function in ubiquitination and  
105 immune regulation. Using a tamoxifen-inducible Cre-LoxP system, we recently successfully  
106 deleted an essential gene, UBXN3B, in adult mice and demonstrated that UBXN3B positively  
107 regulates the STING-mediated type I IFN response to a DNA virus<sup>15</sup>. Because STING signaling  
108 also plays a role in controlling some RNA viruses in an IFN-dependent or -independent manner,  
109 we continued investigating the physiological role of UBXN3B in restricting RNA virus infection.  
110 To this end, we tested with respiratory viruses of public health significance including SARS-  
111 CoV-2 and influenza A virus (IAV). Because mice are barely permissive to clinical isolates of  
112 SARS-CoV-2, we delivered human angiotensin-converting enzyme 2 (ACE2, the cellular entry

113 receptor for SARS-CoV)-expressing Ad5 vector (replication-defective adenovirus vector)  
114 intranasally to the mouse lung before infection<sup>18 19</sup>. We observed a slight drop in body mass a  
115 few days post SARS-CoV-2 infection (p.i.) and rapid recovery of *Ubxn3b*<sup>+/+</sup> (*Cre*<sup>+</sup> *Ubxn3b*<sup>flox/flox</sup>  
116 treated with corn oil) mice, while a ~10% reduction in the body weight of *Ubxn3b*<sup>-/-</sup> (*Cre*<sup>+</sup> *Ubxn3b*  
117 <sup>flox/flox</sup> treated with tamoxifen dissolved in corn oil) littermates by days 3-4 p.i. and a significant  
118 delay in recovery (**Fig.1a**). Moreover, all infected *Ubxn3b*<sup>-/-</sup> mice showed hunched posture and  
119 decreased mobility at day 2 p.i., while *Ubxn3b*<sup>+/+</sup> animals behaved normally (Suppl Movie 1 and  
120 2). Histopathological analyses by hematoxylin and eosin (H&E) staining revealed more immune  
121 infiltrates in the lung of both *Ubxn3b*<sup>+/+</sup> and *Ubxn3b*<sup>-/-</sup> mice at day 3 p.i., compared to uninfected  
122 mice (day 0). However, there was no significant difference in the numbers of immune infiltrates  
123 between the two groups (**Fig.1b**). At day 10 p.i., many clusters of brownish cells were noted in  
124 the H&E sections of all *Ubxn3b*<sup>-/-</sup>, but none in any *Ubxn3b*<sup>+/+</sup> mice (**Fig.1b**). We reasoned that  
125 these brownish cells were representative of hemosiderosis, a form of iron overload disorder  
126 resulting in the accumulation of hemosiderin, an iron-storage complex. In the lung,  
127 macrophages phagocytose red blood cells due to vascular leakage, leading to iron overload.  
128 Using iron staining we tested this hypothesis and detected a few lightly iron-laden cells at day 3  
129 p.i., but many clusters of heavily iron-laden cells by day 10 p.i. in all the *Ubxn3b*<sup>-/-</sup> lungs  
130 compared to *Ubxn3b*<sup>+/+</sup> (**Fig.1c, d**). On day 35 p.i., we still noted moderate lung hemosiderosis  
131 in some knockout mice. Of note, with either low or high viral loads, all *Ubxn3b*<sup>-/-</sup> mice  
132 presented a similar degree of hemosiderosis at days 3 and 10 p.i., while no *Ubxn3b*<sup>+/+</sup> mouse  
133 had it (**Fig. 1c, d**), suggesting that the severe lung damage in *Ubxn3b*<sup>-/-</sup> mice is primarily  
134 caused by immunopathology. We next asked if these observations could be extended to other  
135 respiratory viruses, such as influenza. Indeed, *Ubxn3b*<sup>-/-</sup> mice lost more body weight; and of

136 note, 70% of them succumbed to a dose of H1N1 influenza A that was only sublethal to  
137 *Ubxn3b*<sup>+/+</sup> mice (**Fig.1e, f**).

138

139 Severe COVID-19 pathogenesis is a combination of a direct cytopathic effect of SARS-CoV-2  
140 replication and hyper-inflammation in the lung <sup>16</sup>. In particular, COVID-19 fatality is strongly  
141 associated with elevated inflammatory mediators such interleukin 6 (IL-6) and tumor necrosis  
142 factor (TNF- $\alpha$ ) etc. <sup>16</sup>. We first examined viral loads and immune gene expression. The viral  
143 loads in lungs trended higher in *Ubxn3b*<sup>-/-</sup> when compared to *Ubxn3b*<sup>+/+</sup> mice, though they  
144 varied significantly among individuals at day 3 p.i. By day 10 p.i. the virus was almost cleared  
145 from the lung in both mouse genotypes (Suppl **Fig.s1a**). The serum cytokines IL-6, TNF- $\alpha$ , IL-10  
146 and granulocyte-macrophage colony-stimulating factor (GM-CSF) were higher in *Ubxn3b*<sup>-/-</sup> than  
147 those in *Ubxn3b*<sup>+/+</sup> on day 3 p.i. (Suppl **Fig.s1b**), which is consistent with clinical observations in  
148 severe COVID-19 patients. The concentrations of serum interferon alpha (IFN- $\alpha$ ), C-X-C motif  
149 chemokine ligand 10 (CXCL10) and IFN- $\gamma$  were modestly upregulated, but equally between  
150 *Ubxn3b*<sup>-/-</sup> and *Ubxn3b*<sup>+/+</sup> mice after SARS-CoV-2 infection, suggesting a normal type I/II IFN  
151 response in *Ubxn3b*<sup>-/-</sup> (Suppl **Fig.s1b**).

152

### 153 **UBXN3B maintains immune homeostasis during SARS-CoV-2 infection**

154 COVID-19 fatality is strongly associated with an imbalance in immune cell compartmentalization,  
155 characterized by neutrophilia and lymphopenia <sup>16</sup>. We thus analyzed neutrophils and T cells in  
156 the lung by flow cytometry and found that the total CD45<sup>+</sup> immune cell counts per lung were  
157 ~10-fold higher in SARS-CoV-2-infected animals than mock-treated animals. However, there  
158 was no significant difference between *Ubxn3b*<sup>-/-</sup> and *Ubxn3b*<sup>+/+</sup> littermates (**Fig.2a**). Upon close

159 examination we detected ~3 -fold increase of CD11b<sup>+</sup> cells, while a modest reduction of total  
160 and CD4<sup>+</sup> T cells in *Ubxn3b*<sup>-/-</sup> compared to *Ubxn3b*<sup>+/+</sup> mice (**Fig.2b**). Importantly, the ratio of  
161 neutrophil-to-T/B lymphocytes (N/L) in the lung was significantly higher (3.2-fold) in *Ubxn3b*<sup>-/-</sup>  
162 (**Fig.2c**), which is consistent with the clinical observations in severe COVID-19 patients<sup>20</sup>. This  
163 prompted us to examine more immune cell compartments in the lung and peripheral blood, and  
164 the longer impact of SARS-CoV-2 infection on immune cells. We noted ~3-fold increase in  
165 neutrophil and 10-fold decrease in B cell frequencies (**Fig.2d**); the N/L ratio was also much  
166 higher in the blood of *Ubxn3b*<sup>-/-</sup> than *Ubxn3b*<sup>+/+</sup> mice at day 3 p.i. (**Fig.2e**). By day 35 p.i., the  
167 total immune cells and T cells were lower, while neutrophils, macrophages/monocytes and N/L  
168 ratios were higher, in *Ubxn3b*<sup>-/-</sup> than *Ubxn3b*<sup>+/+</sup> lungs (**Fig.2f, g**, Suppl **Fig.s2**). Remarkably, the  
169 B cell frequencies and counts were dramatically decreased (5-20-fold) in both the lung and  
170 blood of *Ubxn3b*<sup>-/-</sup> mice (**Fig.2d, f**). On day 35 p.i., *Ubxn3b*<sup>-/-</sup> mice had ~40% fewer total  
171 CD45<sup>+</sup> cells in the blood (**Fig.2h**) and presented splenic atrophy characterized by reduced cell  
172 density in white pulps and increased myeloid clumps in red pulps, when compared to *Ubxn3b*<sup>+/+</sup>  
173 animals (Suppl **Fig.s3**). Because of the dramatic defect in B cell compartment that might lead to  
174 a weak antibody response, we thus measured the concentrations of serum anti- SARS-CoV-2  
175 Spike and IVA nucleoprotein IgG by enzyme-linked immunosorbent assay (ELISA). Indeed, the  
176 IgG concentrations in *Ubxn3b*<sup>-/-</sup> were lower than those in *Ubxn3b*<sup>+/+</sup> mice (**Fig.2i**).

177

### 178 **UBXN3B maintains steady-state hematopoietic homeostasis**

179 The above-mentioned results suggest an essential role of UBXN3B in maintenance of immune  
180 cell homeostasis during viral infection. Therefore, to test the hypothesis that dysregulated  
181 immune homeostasis is caused by *Ubxn3b*<sup>-/-</sup> deficiency, we reasoned that in the steady state



182 *Ubxn3b*<sup>-/-</sup> mice should have alterations that cannot be explained by infection. Indeed, by flow  
183 cytometry, we observed a significant increase in the frequencies of myeloid cells (neutrophils,  
184 monocytes, macrophages), in the blood and spleen of *Ubxn3b*<sup>-/-</sup> compared to *Ubxn3b*<sup>+/+</sup> mice.  
185 Although the T cell frequencies were slightly lower or not different, its counts were significantly  
186 lower in both tissues of *Ubxn3b*<sup>-/-</sup> than *Ubxn3b*<sup>+/+</sup> mice (**Fig.3a, b**). The total CD45<sup>+</sup> count per  
187 spleen was ~3-fold lower in *Ubxn3b*<sup>-/-</sup> (**Fig.3b**). Of note, *Ubxn3b*<sup>-/-</sup> mice had over 10 times  
188 lower B cell counts and frequencies in both tissues of knockout mice (**Fig.3a, b**). Although the  
189 magnitudes of difference in T cell frequency varied with tissues, the N/T ratios were uniformly  
190 much higher in all tissues of *Ubxn3b*<sup>-/-</sup> when compared to *Ubxn3b*<sup>+/+</sup> mice (**Fig.3c**). Next, we  
191 asked if STING has a role in steady state hematopoiesis because our recent study  
192 demonstrated a role of UB3N3B in activating STING signaling<sup>15</sup>. The results show that the  
193 blood immune cell compositions were similar between wild type and *Sting*<sup>-/-</sup> mice (Suppl **Fig.s4**),  
194 suggesting a STING-independent role of UB3N3B in hematopoiesis.

195  
196 Hematopoiesis involves a global change of gene expression controlled by cell-intrinsic  
197 transcription factors and epigenetic modifiers, and cell-extrinsic factors such as cytokines,  
198 chemokines, growth factors, and interactions with osteoblasts, endothelial cells, reticular cells  
199 and stromal cells in its bone marrow niche<sup>3</sup>. To investigate if the B cell defect in *Ubxn3b*<sup>-/-</sup> is  
200 cell-intrinsic or extrinsic, we performed reciprocal bone marrow transplantation. Firstly, we  
201 transferred Cre<sup>+</sup> *Ubxn3b*<sup>flox/flox</sup> bone marrow (CD45.2) to irradiated wild type (WT, CD45.1)  
202 recipient mice. Thirty days after transplantation, the recipient WT mice were treated with either  
203 corn oil (designated *Ubxn3b*<sup>+/+</sup>BM-WT) or tamoxifen (dissolved in corn oil) to induce *Ubxn3b*  
204 deletion in the bone marrow (BM) (designated *Ubxn3b*<sup>-/-</sup> BM-WT). We confirmed that > 99% of

205 blood B cells /neutrophils/monocytes, and >82% of T cells were derived from the CD45.2 donor  
206 at 45 days after transplantation (Suppl **Fig.s5a**), indicating successful irradiation and immune  
207 reconstitution. We noted an unusually high neutrophil ratio in *Ubxn3b*<sup>+/+</sup> BM–WT mice at day 15  
208 than regular *Ubxn3b*<sup>+/+</sup> mice (~32% versus ~10%), and it was back to normal by day 30  
209 (**Fig.4a,b**, Suppl **Fig.s5b**). This is likely because of faster reconstitution of neutrophils than B  
210 cells after BMT. Nonetheless, the B cell cellularity in the chimeric *Ubxn3b*<sup>-/-</sup> BM–WT mice was  
211 consistently much lower than that in *Ubxn3b*<sup>+/+</sup> BM–WT mice throughout the study period  
212 (**Fig.4a-c**). Moreover, *Ubxn3b*<sup>-/-</sup> BM–WT mice were more vulnerable to SARS-CoV-2 infection,  
213 typified by more iron-laden cells than *Ubxn3b*<sup>+/+</sup> BM–WT mice were in the lung at day 7 p.i.  
214 (**Fig.4d**). Conversely, *Ubxn3b*<sup>flx/flx</sup> or Cre<sup>+</sup> *Ubxn3b*<sup>flx/flx</sup> mice (CD45.2) were irradiated and  
215 transplanted with WT (CD45.1) bone marrow. Thirty days after transplantation, the recipient  
216 mice were treated with tamoxifen, resulting in chimeric WT BM–*Ubxn3b*<sup>+/+</sup> and WT BM–  
217 *Ubxn3b*<sup>-/-</sup> mice. The B cell numbers were comparable between the two groups (Suppl **Fig.s6**).  
218 These data suggest that UBKN3B plays a cell-intrinsic role in controlling B cell development and  
219 hematopoietic UBKN3B is critical for restricting SARS-CoV-2 pathogenesis.

220

## 221 **UBKN3B controls B lymphopoiesis by maintaining BLNK protein stability and pre-BCR** 222 **signaling**

223 The aforementioned results suggest that UBKN3B likely regulates B cell development. To this  
224 end, we quantitated terminally differentiated immune cells in the bone marrow. Among all live  
225 cells (after lysis of red blood cells), neutrophil was the most abundant, then B cell. The  
226 percentage of B cells was ~6-fold lower, while the frequency of neutrophils was moderately  
227 higher, in *Ubxn3b*<sup>-/-</sup> than *Ubxn3b*<sup>+/+</sup> bone marrow (**Fig.5a**, Suppl **Fig.s7a**). These results

228 suggest that dysregulated hematopoiesis in *Ubxn3b*<sup>-/-</sup> is due to a defect in B lymphopoiesis,  
229 which we tested by assessing all the stages of B cell development. Of note, the percentage of  
230 large and small precursor BII (pre-B), immature B (imm-B) and mature B (recirculating B)  
231 fractions was significantly lower in *Ubxn3b*<sup>-/-</sup> than *Ubxn3b*<sup>+/+</sup>, while that of progenitor B (pro-B)  
232 and precursor BI (pre-BI) fractions was the same (**Fig.5b**, Suppl **Fig.s7b**), suggesting that  
233 UB3B is essential for pre-BI transition to pre-BII, the first checkpoint. Next, we examined  
234 stem cells and other lineage progenitors. Total HSCs (Lin<sup>-</sup> Sca<sup>+</sup> Kit<sup>+</sup>) contains two populations,  
235 long-term HSCs, which are capable of self-renewal but are quiescent at steady state, and  
236 short/mid-term multipotent HSCs (also known as MPPs), which are capable of differentiating  
237 into lineage-committed progenitors. The LSK and MPP percentage was modestly decreased in  
238 *Ubxn3b*<sup>-/-</sup> when compared to *Ubxn3b*<sup>+/+</sup>. The frequency of lineage-committed common lymphoid  
239 progenitors (CLPs) was also reduced, while the common myeloid progenitors (CMPs) trended  
240 higher in *Ubxn3b*<sup>-/-</sup> (**Fig.5c**, Suppl **Fig.s8**).

241  
242 The abovementioned results demonstrate that UB3B is essential specifically for early B cell  
243 development, and this is cell-intrinsic. Therefore, we sorted early bone marrow B fractions and  
244 quantified by qRT-PCR the mRNA expression of well-established transcription factors for  
245 hematopoiesis, several of which are B lineage-specific/dominant transcription factors, including  
246 early B cell factor (EBF1), paired box protein 5 (PAX5), myocyte enhancer factor (MEF2C) and  
247 Ikaros family zinc finger 1/3 (IKZF1/3)<sup>21</sup>. *Ebf1*, *Pax5* and *Ikzf3* (encodes Aiolos) mRNA levels  
248 were dramatically induced (>100 fold) in pro-B, pre-B and mature B, when compared to those in  
249 pre-pro-B cells. Of note, *Ikzf3* was decreased by 5-fold and *Ikzf1* (encodes Ikaros) was modestly  
250 reduced but only transiently in *Ubxn3b*<sup>-/-</sup> pro-B cells, when compared to that in *Ubxn3b*<sup>+/+</sup> pro-B

251 cells (Suppl **Fig.s9a**). We also checked B cell surface marker genes (*Cd19*, *Cd79a* and *Ii7ra*)  
252 and observed no significant difference (Suppl **Fig.s9b**). These data suggest that the  
253 transcription factor expression in general is intact in *Ubxn3b*<sup>-/-</sup> B lineage.

254

255 Because our data have shown that UB3N3B is essential for the transition from pre-BI to large  
256 pre-BII (checkpoint 1), we postulated that UB3N3B might regulate pre-B cell receptor (BCR)  
257 signaling. Pre-BCR signaling plays several important roles, including allelic exclusion,  
258 negative/positive selection, and proliferation of large pre-BII<sup>22</sup>. A Pre-BCR comprises an Ig  $\mu$   
259 heavy chain ( $\mu$ H) and a surrogate light chain (SLC); the latter is transiently robustly induced in  
260 pro-B and pre-BI, but rapidly down-regulated in large pre-BII to allow for BCR recombination  
261 and expression<sup>23</sup>. Indeed, *Vpreb* expression (V-set pre-B cell surrogate light chain) was up-  
262 regulated by >150 times in pro-B when compared to pre-pro-B, further in pre-BI cells, then was  
263 suppressed in large pre-BII, but barely detected in recirculating B and other fully differentiated  
264 lineages. We observed a modest increase in *Vpreb* mRNA in pro-B, pre-BI and large pre-BII of  
265 *Ubxn3b*<sup>-/-</sup>, compared to that of *Ubxn3b*<sup>+/+</sup> mice (**Fig.6a**). However, the surface Vpreb1 protein  
266 abundance was comparable between Vpreb1<sup>+</sup> (pro-B, pre-BI, large pre-BII cells) *Ubxn3b*<sup>-/-</sup> and  
267 *Ubxn3b*<sup>+/+</sup> cells (**Fig.6b**). Of note, *Ubxn3b* expression was higher in the B lineage than  
268 T/neutrophil/monocytes, being the highest in pre-BI, coincident with its essential role at the first  
269 checkpoint (**Fig.6a**). Next, we attempted to obtain a full picture of the pathways regulated by  
270 UB3N3B. To this end, we performed single cell RNA sequencing (scRNAseq) on all bone  
271 marrow B fractions (excluding mature, recirculating B), HSCs and progenitors (CLPs, GMPs and  
272 MEPs). We analyzed the differentially expressed genes (DEGs) in SLC-high (SLC<sup>hi</sup>) B subsets  
273 (**Fig.6c**) and identified 49 down-regulated genes with an average count per cell >1 and a p<0.1

274 (Log2 fold range -0.7 to -1.7) in *Ubxn3b*<sup>-/-</sup> SLC<sup>hi</sup> cells. Of note, 10 genes (~20% of total down-  
275 regulated DEGs) were related to the cell cycle/mitosis/DNA replication pathways (Suppl **Table**  
276 **s1, Fig.6d**). The opening of IgK gene locus and recombination by RAG1/2 downstream of pre-  
277 BCR is essential for B lymphopoiesis<sup>24,25</sup>. Intriguingly, *Igkc* was downregulated too (Log2 = -1.3,  
278 p=0.00025). Fifty genes were upregulated, including three SLC genes (*Vpreb1/2* and *Igll1*)  
279 (Suppl **Table s1**), consistent with the qRT-PCR result (**Fig.6a**). In *Ubxn3b*<sup>-/-</sup> SLC-low (SLC<sup>lo</sup>) B  
280 cells, 23 genes were significantly down-regulated (Log2 range -0.7 to -2.9), three of which were  
281 BCR genes (*Iglc1*, *Iglc2*, *Ighd*); but no significant pathway was identified (Suppl **Table s2**). We  
282 noted only 5-7 significantly down-regulated genes and no significantly enriched pathways in  
283 HSCs or GMPs (Suppl **Table s3, 4**). These data suggest that UBXM3B likely regulates pre-  
284 BCR downstream signaling components. To this end, we first examined these protein  
285 expression. B-cell linker (BLNK/SLP65) expression was gradually reduced from pre-pro-B to  
286 large pre-B cells; it was much lower in *Ubxn3b*<sup>-/-</sup> than that in corresponding *Ubxn3b*<sup>+/+</sup> B  
287 fractions. The level of Bruton's tyrosine kinase (BTK), phospholipase C gamma 2 (PLC-γ2),  
288 transcription factors forkhead box protein O1 (FoxO1) and CCAAT-enhancer-binding protein α  
289 (C/EBPα) remained constant and similar between all *Ubxn3b*<sup>+/+</sup> and *Ubxn3b*<sup>-/-</sup> B fractions  
290 (**Fig.6e**). *Blnk* mRNA expression was similar between *Ubxn3b*<sup>+/+</sup> and *Ubxn3b*<sup>-/-</sup>, but lower in  
291 SLC<sup>lo</sup> than SLC<sup>hi</sup> B cells (**Fig.6f**). Next we checked if pre-BCR signaling is defective by  
292 measuring calcium influx. We purified bone marrow B fractions including SLC<sup>hi</sup> pro-B/ pre-  
293 BI/large pre-BII, SLC<sup>lo</sup> small pre-BII and immature B, and mature B fractions by FACS;  
294 stimulated (pre-) BCR signaling with an anti-IgM μH antibody, and monitored calcium flux over a  
295 time course by flow cytometry. The anti-IgM μH antibody significantly increased calcium influx in  
296 all *Ubxn3b*<sup>+/+</sup> B fractions, which was impaired in *Ubxn3b*<sup>-/-</sup> cells (**Fig.6g**). Of note, the difference

297 in the calcium flux and BLNK protein level between *Ubxn3b*<sup>-/-</sup> and *Ubxn3b*<sup>+/+</sup> mature B cells  
298 became smaller. These data suggest that UB3N3B maintains BLNK protein stability specifically  
299 during early B development.

300

## 301 **DISCUSSION**

302

303 The HSC differentiation cascade must be finely regulated to enable timely production of the right  
304 number and type of mature cells, i.e. homeostasis, disruption of which may lead to a  
305 pathological state, such as autoimmunity, immunodeficiency, cancer etc. As an example,  
306 lymphopenia and a skewing myeloid-to-lymphoid ratio in the elderly may contribute to  
307 inflammaging and impaired immunity<sup>26</sup>. In this study, we have discovered a novel and essential  
308 role of UB3N3B in maintenance of hematopoietic homeostasis, of note, B cell development, and  
309 control of immunopathogenesis of respiratory viral diseases.

310

311 ***The mechanism of UB3N3B action in RNA virus pathogenesis.*** Mechanistically, UB3N3B  
312 might control RNA virus infection by regulating STING signaling and type I IFN responses<sup>15 27</sup>.  
313 However, expression of type I IFNs is normal in *Ubxn3b*<sup>-/-</sup> mice, so is steady-state  
314 hematopoiesis in *Sting*-deficient mice. These results suggest that the primary function of  
315 UB3N3B during RNA virus infection is independent of STING and that dysregulated  
316 hematopoiesis may be the main contributor to failure of viral clearance and prolonged  
317 immunopathology in *Ubxn3b*<sup>-/-</sup> mice. Indeed, although belonging to very different families of  
318 RNA viruses, both SARS-CoV-2 and IVA elicit immunopathology in the lung, including massive  
319 immune infiltrates and elevated levels of systemic pro-inflammatory mediators<sup>17</sup>. In particular,

320 COVID-19 fatality is strongly associated with neutrophilia and lymphopenia <sup>16</sup>, which is partly  
321 recapitulated in *Ubxn3b*<sup>-/-</sup> mice. Intriguingly, regardless of viral loads, all *Ubxn3b*<sup>-/-</sup> mice present  
322 a similar degree of hemosiderosis at days 3 and 10 p.i., while none of *Ubxn3b*<sup>+/+</sup> mice have  
323 evident hemosiderosis, suggesting that the severe lung damage in *Ubxn3b*<sup>-/-</sup> mice is primarily  
324 caused by immunopathology. On the other hand, heightened immunopathology and tissue  
325 damage persists in *Ubxn3b*<sup>-/-</sup> mice even after viral clearance (day 10 post SARS-CoV-2  
326 inoculation), suggesting that immunopathogenesis is disassociated from viral replication.  
327 Consistent with this notion, the hyperinflammatory phase of clinical COVID-19 generally  
328 happens after the viral load peak, with a few infectious viral particles <sup>28</sup>. At the post clearance  
329 stage, a high N/L ratio may sustain inflammation, and thus is correlated with poor prognosis of  
330 severe COVID-19 patients <sup>29 20</sup>. The N/L ratio is also the most reliable biomarkers of chronic  
331 inflammatory conditions, such as type II diabetes <sup>30</sup>, cardiovascular disease <sup>31</sup>, and aging <sup>32</sup> etc.  
332 These are actually significant risk factors for COVID-19 mortality<sup>16</sup>. These conditions are  
333 characterized by a low-grade pro-inflammatory and an “immunosenescence”-like immune state  
334 that is unable to clear viruses <sup>20</sup>. In this regard, UBXN3B deficiency might resemble the aging  
335 immune state.

336

337 ***The mechanism of UBXN3B action in B cell development.*** Although our initial pursuit with  
338 UBXN3B focused on RNA virus pathogenesis, the unexpected and significant phenotype in B  
339 cell compartment prompted us to delve into B lymphopoiesis. Mechanistically, this defect is cell  
340 intrinsic because reconstitution of the hematopoietic system of *Ubxn3b*<sup>-/-</sup> mice with WT bone  
341 marrow restores B cellularity, while reverse transplantation fails to do so. However, expression  
342 of cell-intrinsic B-lineage transcription factors (Pax5, Ebf1, Myb, Irf1) is largely normal except

343 for a transient downregulation of *Ikzf1/3* in pro-B only, which seems unlikely accountable for a  
344 significant defect in the B cell compartment in *Ubxn3b*<sup>-/-</sup> mice. Of note, the cellularity of pre-BI  
345 and B progenitors remains normal, until the large pre-BII stage in *Ubxn3b*<sup>-/-</sup> mice, suggesting a  
346 failure of transition from pre-BI to large pre-BII, also known as the first checkpoint. This stage  
347 requires a transient yet essential pre-BCR signaling to drive allelic exclusion, negative/positive  
348 selection, and proliferation of large pre-BII<sup>22</sup>. Indeed, in *Ubxn3b*<sup>-/-</sup> SLC<sup>hi</sup> B subset (primarily  
349 pre-BI)<sup>33</sup>, the down-regulated genes are enriched in the cell cycle/mitosis/DNA replication  
350 pathways. However, in *Ubxn3b*<sup>-/-</sup> SLC<sup>Lo</sup> B fraction (predominantly small pre-BII and immature B)  
351<sup>33</sup>, there is no significantly down-regulated pathway. These data suggest that UBKN3B is  
352 associated with a developmental stage-specific signaling pathway, e.g., pre-BCR. Indeed, our  
353 results demonstrate that UBKN3B is essential for maintenance of BLNK protein stability during  
354 the early stage of B development. BLNK is a scaffold protein that is essential for assembly of a  
355 macromolecular complex comprising BTK, PLC-γ etc. of the (pre-) BCR pathway<sup>34</sup>. BLNK acts  
356 at B220<sup>+</sup> CD43<sup>+</sup> pro-B transition to B220<sup>+</sup> CD43<sup>-</sup> pre-B<sup>35,36</sup>. Similarly, with more surface markers,  
357 we show that UBKN3B is essential for B220<sup>+</sup> CD43<sup>+</sup> pre-BI transition to B220<sup>+</sup> CD43<sup>+</sup> large pre-  
358 BII and then proliferation of B220<sup>+</sup> CD43<sup>-</sup> small pre-BII. However, UBKN3B is no longer  
359 essential for BLNK protein stability and BCR signaling in mature B cells. This is likely because  
360 that a few *Ubxn3b*<sup>-/-</sup> cells at the early stage still express sufficient BLNK and finally differentiate  
361 into mature B. Considering that UBKN3B is also expressed by mature B cells, it is plausible that  
362 UBKN3B may dependent on an early B stage-specific cellular factor to maintain a high BLNK  
363 level.  
364



365 How does UBXN3B regulate BLNK protein level? Many UBXNs including UBXN3B are known to  
366 interact with p97 and multiple E3 ligases, thus controlling newly synthesized protein quality, and  
367 regulating protein turnover<sup>8,9</sup>. Thus, by interfacing different E3 ligases under different  
368 physiological, developmental or tissue contexts, UBXNs could participate in multiple cellular  
369 functions. Indeed, UBXN3B works with tripartite motif-containing 56 (TRIM56) to ubiquitinate  
370 and activate STING during DNA virus infection<sup>15</sup>. In early B development, UBXN3B could inhibit  
371 a specific E3 ligase that mediates BLNK turnover. In support of this concept, we recently  
372 showed that UBXN6 inhibits degradation of phosphorylated tyrosine kinase 2 (TYK2) and type  
373 I/III interferon receptor activated by type I/III IFNs<sup>37</sup>.

374

375 In summary, our results demonstrate that UBXN3B is essential for maintenance of  
376 hematopoietic homeostasis and in particular B lymphopoiesis during steady state and viral  
377 infection. Aberrant immune compartmentalization associated with UBXN3B deficiency may  
378 predispose an individual to persistently heightened immunopathology during viral infection.  
379 Future work will address how UBXN3B regulates BLNK stability.

380

381

382

383

384 **MATERIALS AND METHODS**

385

386 *Mouse models*

387 The mouse line with the exon 1 of *Ubxn3b* flanked by two LoxP sites (*Ubxn3b*<sup>flox/flox</sup>) were  
388 generated via homologous recombination by Dr. Fujimoto at Nagoya University<sup>38</sup>. The  
389 homozygous *Ubxn3b*<sup>flox/flox</sup> were then crossed with homozygous tamoxifen-inducible Cre  
390 recombinase-estrogen receptor T2 mice (The Jackson Laboratory, Stock # 008463) to generate  
391 Cre<sup>+</sup> *Ubxn3b*<sup>flox/flox</sup> littermates. To induce *Ubxn3b* deletion, > 6-weeks old mice were injected  
392 with 100  $\mu$ l of tamoxifen (10 mg /ml in corn oil) (Sigma, #T5648) via intraperitoneal (i.p.)  
393 every 2 days for a total duration of 8 days (4 doses). Successful deletion of *Ubxn3b* was  
394 confirmed in our recent study<sup>12</sup>. A half of Cre<sup>+</sup> *Ubxn3b*<sup>flox/flox</sup> litters were treated with tamoxifen  
395 and designated *Ubxn3b*<sup>-/-</sup>; the other half were treated with corn oil only and designated  
396 *Ubxn3b*<sup>+/+</sup>. Mice were allowed to purge tamoxifen for at least 4 weeks before any infection or  
397 analyses was performed. B6.SJL-Ptprc<sup>a</sup> Pepc<sup>b</sup>/BoyJ (Stock No. # 002014) is a congenic strain  
398 used widely in transplant studies because it carries the differential pan leukocyte marker Ptprc<sup>a</sup>,  
399 commonly known as Cd45.1 or Ly5.1. All experiments were performed in accordance with  
400 relevant guidelines and regulations approved by the Institutional Animal Care and Use  
401 Committee at the University of Connecticut and Yale University.

402

403 *Antibodies, Cell lines and Viruses*

404 A rabbit anti-BLNK mAb (Clone D3P2H, Cat #36438), anti- $\beta$ -Actin mAb (Clone D6A8, Cat #  
405 8457), anti-phospho-BLNK mAb (Thr152) (Clone E4P2P, Cat #62144), anti-GAPDH (Clone  
406 D16H11, Cat # 5174), anti-BTK mAb (Clone D3H5, Cat # 8547), anti-phospho-BTK mAb

407 (Tyr223) (Clone D1D2Z, Cat # 87457), anti-Syk mAb (Clone D3Z1E, Cat # 13198), anti-  
408 phospho-Zap-70 (Tyr319)/Syk (Tyr352) mAb (Clone 65E4, Cat # 2717), anti-MEK1/2 mAb  
409 (Clone D1A5, Cat # 8727), and anti-phospho-MEK1/2 mAb (Ser221) (Clone 166F8, Cat # 2338)  
410 were purchased from Cell Signaling Technology (Danvers, MA 01923, USA). Human  
411 embryonic kidney 293 cells transformed with T antigen of SV40 (HEK293T, # CRL-3216) and  
412 Vero cells (monkey kidney epithelial cells, # CCL-81) were purchased from American Type  
413 Culture Collection (ATCC) (Manassas, VA20110, USA). These cell lines are not listed in the  
414 database of commonly misidentified cell lines maintained by ICLAC. Cells were grown in DMEM  
415 supplemented with 10% fetal bovine serum (FBS ) and antibiotics/antimycotics (Life  
416 Technologies, Grand Island, NY 14072 USA). We routinely added MycoZAP (Lonza Group,  
417 Basel, Switzerland) to cell cultures prevent mycoplasma contamination.

418 SARS-CoV-2 (NR-52281, Isolate USA-WA1/2020) was provided by BEI Resources  
419 (funded by National Institute of Allergy and Infectious Diseases and managed by ATCC, United  
420 States). The full-length human ACE2 [Accession No: NM\_021804.2] cDNA was inserted into  
421 pAV-EGFP-CMV/FLAG and Ad5 viruses were prepared by Vector Builder Inc. (Chicago, IL  
422 60609, USA).

423

#### 424 *Concentration of SARS-CoV-2*

425 The virus was grown in Vero cells for 72hrs, and the culture medium was cleared by brief  
426 centrifugation. A PEG-it Virus Precipitation Solution (Cat# LV810A-1, System Biosciences, Palo  
427 Alto, CA 94303, USA) was added to 40ml of virus culture at a 1:4 ratio, incubated overnight at  
428 4°C. The mixture was centrifuged at 1500xg for 30 min, and the resulting pellet was suspended

429 in 1ml of DMEM medium. In parallel, Vero cell culture medium without virus was processed in  
430 the same way and used for mock infection.

431

#### 432 *Plaque-Forming Assay*

433 Quantification of infectious viral particles in sera or homogenized tissues was performed on  
434 Vero cell monolayer<sup>39</sup>. Briefly, viral samples were incubated with confluent Vero cells (6-well  
435 plate) at 37°C for 2 hr. The inoculum was then removed and replaced with 2 ml of DMEM  
436 complete medium with 1% SeaPlaque agarose (Cat. # 50100, Lonza). The cells were incubated  
437 at 37°C, 5% CO<sub>2</sub> for 3 days, and on the fourth day the cells were stained with Neutral Red  
438 (Sigma-Aldrich) overnight.

439

#### 440 *Mouse Infection and Monitoring*

441 Mice were administered intranasally 2x10<sup>8</sup> plaque forming units (PFU) of Ad5-hACE2, after 5  
442 days then intranasally inoculated with 2x10<sup>5</sup> PFU of SARS-CoV-2 or mock. Three hundred and  
443 fifty CCID<sub>50</sub> (cell culture infectious dose 50% assay) of Influenza A PR8/34 H1N1 strain was  
444 administered to mice by intranasal instillation in 40µl of sterile phosphate buffered saline. The  
445 body mass of individual mice was weighed on the day of infection (Day 0) as a baseline. The  
446 percentage change in an animal was calculated as 100 x (Day n-Day 0)/Day 0, where n defines  
447 the length of infection (in days).

448

#### 449 *Bone Marrow Transplantation*

450 Eight weeks or older wild type (WT, B6, Cd45.1, recipient) male mice were irradiated at a lethal  
451 dose (900 rad) with a Gammacell-40 irradiator once, and transplanted with ERT2-Cre<sup>+</sup>-

452  $Ubxn3b^{flox/flox}$  bone marrow (BM) cells (donor, Cd4.2) intravenously. Thirty days after  
453 transplantation, a half of the mice were administered 100 $\mu$ l of tamoxifen (10 mg / ml in corn oil)  
454 (Sigma, #T5648) via intraperitoneal injection (i.p.) every 2 days for a total duration of 8 days (4  
455 doses) (designated  $Ubxn3b^{-/-}$  BM–WT). The other half was treated with corn oil in the same way  
456 (designated  $Ubxn3b^{+/+}$  BM–WT). Conversely,  $Ubxn3b^{flox/flox}$  or ERT2-Cre<sup>+</sup>  $Ubxn3b^{flox/flox}$  mice  
457 were irradiated and transplanted with WT BM. Thirty days after transplantation, all the recipient  
458 mice were treated with tamoxifen, resulting in chimeric WT BM– $Ubxn3b^{+/+}$  and WT BM– $Ubxn3b^{-/-}$   
459 mice. Fifteen to forty five days after the last dose of tamoxifen, immune cells were analyzed by  
460 flow cytometry and/or mice were infected with SARS-CoV-2.

461

#### 462 *Tissue Histology*

463 Tissues were fixed in 4% paraformaldehyde (PFA), embedded in paraffin, cut into 4 $\mu$ M- thick  
464 sections, immobilized to glass slides, decalcified, and processed for hematoxylin and eosin  
465 staining. Arbitrary arthritic disease scores (on a 1–5 scale with 1 being the slightest, 5 the worst)  
466 were assessed using a combination of histological parameters, including exudation of fibrin and  
467 inflammatory cells into the joints, alteration in the thickness of tendons or ligament sheaths, and  
468 hypertrophy and hyperlexia of the synovium<sup>40</sup> in a double-blinded manner.

469 Hem siderosis was evaluated by iron staining (Prussian Blue stain) (Cat. # ab150674,  
470 from Abcam, Cambridge, CB2 0AX, UK). Lungs were fixed in 4% PFA, embedded in paraffin,  
471 cut into 4 $\mu$ M- thick sections, immobilized to glass slides, deparaffinized in xylene, rinsed with  
472 100% ethanol, hydrated progressively in 95%, 70% ethanol and distilled water. The slides were  
473 incubated in Iron Stain Solution (1:1 of potassium ferrocyanide solution to hydrochloric acid  
474 solution) for 3 min at ambient temperature, rinsed thoroughly in distilled water, stained in

475 Nuclear Fast Red Solution for 5 minutes, rinsed again with distilled water 4 times, dehydrated in  
476 95% alcohol followed by absolute alcohol, and finally mounted in synthetic resin. The slides  
477 were assessed with an Accu-Scope microscope EXI-310 and images were acquired by an  
478 Infinity II camera and software.

479

#### 480 *Flow cytometry and Fluorescence-Activated Cell Sorting (FACS)*

481 Flow and FACS was performed according to our published study <sup>41</sup>. Mouse tissues were minced  
482 with a fine scissor and digested in 4 mL of digestion medium [20 mg/mL collagenase IV (Sigma-  
483 Aldrich, St. Louis, MO, USA), 5 U/mL dispase (StemCell, Cambridge, MA, USA), and 50 mg/mL  
484 DNase I mix (Qiagen, Germantown, MD, USA) in complete RPMI1640 medium] at 37 °C for 4  
485 hrs. The lysate was filtrated with a 40µm cell strainer. Cells were then pelleted down by  
486 centrifugation at 500 × g for 5 min. The red blood cells in the cell pellet were lysed three times  
487 with a lysis buffer (Cat. # 420301 from BioLegend, San Diego, CA 92121, USA). Cells were  
488 suspended in FACS buffer and stained for 30 min at 4 °C with the desired antibody cocktails  
489 (BioLegend, San Diego, CA, US) of APC-Fire 750-anti CD11b (Cat. # 101261, clone M1/70),  
490 Alexa Fluor 700-anti Ly-6G (Cat. # 127621, clone 1A8), Brilliant Violet 421-anti CD11c (Cat. #  
491 117343, clone N418), PerCP-Cy5.5-anti MHC II (Cat. # 107625, clone M5/114.15.2), PE-anti  
492 Tetherin (PCDA1) (Cat. # 12703, clone 10C2), Brilliant Violet 510-anti F4/80 (Cat. # 123135,  
493 clone BM8), APC-anti CD68 (Cat. # 137007, clone FA-11), PE-Dazzle 594-anti CD3 epsilon  
494 (Cat. # 100347, clone 145-2C11), Brilliant Violet 711-anti CD4 (Cat. # 100557, clone RM4-5),  
495 Brilliant Violet 570-anti CD8a (Cat. # 100739, clone 53-6.7), Brilliant Violet 650 anti-CD161  
496 (NK1.1) (Cat. # 108735, clone PK136), FITC anti-CD117 (cKit) (Cat. # 105805, clone 2B8), PE  
497 anti- erythroid cells (Cat. # 116207, clone TER-119), Brilliant Violet 711-anti CD115 (Cat. #

498 135515, clone AFS98), FITC-anti CD25 (Cat. # 102005, clone PC61), Zombie UV (Cat. #  
499 423107), PE-Cy7-anti CD45 (Cat. # 103113, clone 30-F11), TruStain FcX-anti CD16/32 (Cat. #  
500 101319, clone 93), APC anti-CD127 (IL-7Ra) (Cat. # 135011, clone A7R34), PE-Dazzle 594  
501 anti-Sca-1 (Ly-6A/6E) (Cat. # 108137, clone D7), PE-Cy5 anti-Flt-3 (CD135) (Cat. # 135311,  
502 clone A2F10), Brilliant Violet 421-anti CD34 (Cat. # 119321, clone MEC14.7), PE anti-CD16/32  
503 (Cat. # 101307, clone 93), Brilliant Violet 711-anti IgM (Cat. # 406539, clone RMM-1), Brilliant  
504 Violet 421-anti CD45R (B220) (Cat. # 103239, clone RA3-6B2), Alexa Fluor 700-anti CD19 (Cat.  
505 # 115527, clone 6D5), PE-Cy7 anti-CD93 (Cat. # 136505, clone AA4.1) and Lin- (anti-CD4, CD8,  
506 CD11b, CD11c, Gr1, NK1.1, TER119, Singlec-F, FceRIa, CD19, B220 cocktail). After staining  
507 and washing, the cells were fixed with 4% PFA and analyzed on a Becton-Dickinson FACS  
508 ARIA II, CyAn advanced digital processor (ADP). Data were analyzed using the FlowJo  
509 software. Among CD45<sup>+</sup> cells, CD11b<sup>+</sup> Ly6G<sup>+</sup> cells were classified as neutrophils, Ly6G<sup>-</sup>CD11b<sup>+</sup>  
510 F4/80<sup>+</sup> as monocytes/macrophages, Ly6G<sup>-</sup> CD11b<sup>+</sup> CD115<sup>+</sup> as monocytes, Ly6G<sup>-</sup> CD11c<sup>+</sup> MHC  
511 II<sup>+</sup> as dendritic cells (DC), CD3<sup>+</sup> as total T cells, CD3<sup>+</sup> CD4<sup>+</sup> as CD4 T cells, CD3<sup>+</sup> CD8<sup>+</sup> as CD8  
512 T cells, CD19<sup>+</sup> as B cells. Lin<sup>-</sup> Sca<sup>+</sup> cKit<sup>+</sup> cells were identified as total HSCs, which were  
513 subdivided into Flt3<sup>high</sup> (short-term HSC or MPP) and Flt3<sup>low</sup> (long-term HSC). Lin<sup>-</sup> Sca<sup>-</sup> cKit<sup>+</sup> cells  
514 were subdivided into CD34<sup>low</sup> CD16/32<sup>low</sup> (MEP), CD34<sup>high</sup> CD16/32<sup>low</sup> (CMP) and CD34<sup>low</sup>  
515 CD16/32<sup>high</sup> (GMP). The Lin<sup>-</sup> CD127<sup>+</sup> cKit<sup>+</sup> cells were identified as CLP.

516 To analyze B lineage fractions, non-B cells (after lysis of red blood cells) were first  
517 dumped with FITC-CD3, -TER119, -LY6G, -LY6C, -CD11b, and -NK1.1. The remaining cells  
518 were then sequentially gated on BV650 anti-B220 (Cat. # 103241, clone RA3-6B2), APC anti-  
519 CD43 (Cat. # 143207, clone S11), PerCP-Cy5 anti-CD24 (Cat. # 101824, clone M1/69), PE anti-  
520 BP1/CD249/Ly51 (Cat. # 108307, clone 6C3), BV421 anti-IgM (Cat. # 406517, clone RMM-1),

521 APC-Cy7 anti-IgD (Cat. # 405715, clone 11-26c.2a), PE-Cy7 anti-CD93 (Cat. # 136505, clone  
522 RAA4.1), PE-Dazzle 594 anti-CD19 (Cat. # 115553, clone 6D5).

523

524 *Single cell RNA sequencing (scRNA-seq)*

525 Bone marrows were pooled from three mice/genotype, and red blood cells were lysed.  
526 HSCs/progenitors and B subsets (excluding mature B) were sorted as described above. In order  
527 to obtain an even coverage of each cell compartment/subset, we mixed approximately 1/6 of  
528 pre-B, ¼ of immature B (which are much more abundant than the others are) with all the  
529 HSCs/progenitors (including B progenitors). About  $5 \times 10^4$  live cells were subjected to a droplet-  
530 based 10x Genomics chromium single cell RNA-Seq on a NovaSeq 6000 sequencer, and  
531 analyzed with a Cell Ranger pipeline. Approximately 11,042 *Ubxn3b*<sup>+/+</sup> and 9,269 *Ubxn3b*<sup>-/-</sup> cells  
532 were sequenced and; ~1600 gene/cell and 3800 unique molecular identifier (UMI) counts/cell  
533 were obtained. Clustering cells, annotating cell clusters and analyzing differentially expressed  
534 genes were performed with Loupe Browser 5.0.1. For annotating cell clusters, we did not  
535 merely rely on the surface markers for flow cytometry, rather we referred to a database,  
536 Bloodspot, which provides transcript expression profiles of genes and gene signatures in  
537 healthy and malignant hematopoiesis and includes data from both humans and mice<sup>42</sup>. The B  
538 subsets were readily identified by a medium to high level of B-restricted transcription factors  
539 (*Pax5*, *Ebf1*) and surface markers (*Cd19*, *Cd79a*), while a barely detectable level of *Fcgr3* and  
540 *Cebpa*. GMPs were *Cd19*<sup>-</sup>, *Cd79a*<sup>-</sup>, *Fcgr3*<sup>hi</sup>, *Cd34*<sup>h</sup>, *Kit*<sup>in</sup>, *Ly6a (Sca-1)*<sup>-</sup>, *Flt3*<sup>-</sup>, *Il7r*<sup>-</sup>, *Cebpa*<sup>hi</sup>.  
541 CMPs are *Cd19*<sup>-</sup>, *Cd79a*<sup>-</sup>, *Fcgr3*<sup>lo</sup>, *Cd34*<sup>hi</sup>, *Kit*<sup>hi</sup>, *Ly6a (Sca-1)*<sup>-</sup>, *Flt3*<sup>in</sup>, *Il7r*<sup>Lo</sup>, *Itga2b (Cd41)*<sup>Lo</sup>,  
542 *Cebpa*<sup>hi</sup>. MEPs are *Cd19*<sup>-</sup>, *Cd79a*<sup>-</sup>, *Fcgr3*<sup>-</sup>, *Cd34*<sup>in</sup>, *Kit*<sup>hi</sup>, *Ly6a (Sca-1)*<sup>-</sup>, *Flt3*<sup>-</sup>, *Il7r*<sup>-</sup>, *Itga2b*  
543 (*Cd41*)<sup>hi</sup>, *Slamf1 (Cd150)*<sup>in</sup>, *Cebpa*<sup>lo</sup>, *Gata1*<sup>hi</sup>. HSCs are *Cd19*<sup>-</sup>, *Cd79a*<sup>-</sup>, *Fcgr3*<sup>-</sup>, *Cd34*<sup>hi</sup>, *Kit*<sup>hi</sup>,



544 *Ly6a* (*Sca-1*)<sup>in</sup>, *Flt3*<sup>in</sup>, *Il7r*<sup>-/-</sup>. Bioinformatics analyses were performed using Reactome  
545 (<https://reactome.org/>). Only those genes with an average count of greater than one per cell and  
546 a p<0.1 were analyzed.

547

#### 548 *Calcium Flux Assay*

549 Bone marrow B fractions were sorted and calcium influx was assayed with a Fluo-4 Direct™  
550 Calcium Assay Kit (ThermoFisher cat# F10471). Briefly cells were incubated with Fluo-4  
551 Direct™ at 37°C for 1 hour. The cells were stimulated with 20µg/ml of a purified F(ab')<sub>2</sub> goat  
552 anti-mouse IgM (µ chain) antibody (BioLegend, Clone Poly21571, Cat# 157102) at 37°C for 10  
553 seconds, and were immediately analyzed by flow cytometry on a Becton-Dickinson FACS ARIA  
554 II, CyAn advanced digital processor (ADP). The final results were presented as the ratio of the  
555 mean fluorescence intensity at any given time point [F] subtracted by the fluorescence at time  
556 point zero [F<sub>0</sub>] (before stimulation) and divided by F<sub>0</sub>, i.e., ΔF/F<sub>0</sub>.

557

#### 558 *Multiplex Enzyme-Linked ImmunoSorbent Assay (ELISA)*

559 We used a LEGENDPlex (BioLegend, San Diego, CA 92121, USA) bead-based immunoassay  
560 to quantify the cytokine concentrations in the sera of SARS-CoV-2 infected mice. The  
561 procedures were exactly same as described in the product manual. Briefly, the samples were  
562 mixed with antibody-coated microbeads in a filter-bottom microplate, and incubated at room  
563 temperature for 2hrs with vigorous shaking at 500 rpm. After removal of unbound analytes and  
564 two washes, 25 µL of detection antibody was added to each well, and the plate was incubated  
565 at room temperature for 1hr with vigorous shaking at 500 rpm. Twenty-five µL of SA-PE reagent  
566 was then added directly to each well, and the plate was incubated at room temperature for

567 30min with vigorous shaking at 500 rpm. The beads were washed twice with wash buffer, and  
568 then transferred to a microfuge tube. The beads were fixed with 4% PFA for 15min and  
569 resuspended in an assay buffer. The beads were run through a BIORAD ZE5 and the  
570 concentrations of analytes were calculated with the standards included using a LEGENDPlex  
571 software.

572

### 573 *Quantification of serum IgG by Enzyme-Linked ImmunoSorbent Assay (ELISA)*

574 Anti-SARS-CoV-2 Spike IgG titers were measured with a commercial ELISA kit (Acro  
575 Biosystems, Cat # RAS-T018). For quantification of influenza IgG, one nanogram of  
576 recombinant A/PR/8/34 influenza NP (generated by UConn Health Protein Expression Core) in  
577 100  $\mu$ L of coating buffer (0.05 M carbonate-bicarbonate, pH 9.6) was coated to a 96-well  
578 microplate at 4°C overnight. The plate was washed once with a wash solution (50 mM Tris, 0.14  
579 M NaCl, 0.05% Tween 20, pH 8.0), and blocked with 4% bovine serum albumin at room  
580 temperature for 2hrs. 100 $\mu$ L of each diluted serum specimens (500-fold) was added a well and  
581 incubated at room temperature for 1hr, then the unbound serum was washed off three times  
582 with the wash solution. 100 $\mu$ L of diluted horseradish peroxidase-conjugated goat anti-mouse  
583 IgG was added to each well and incubated at room temperature for 1hr. After stringency wash,  
584 100  $\mu$ L of substrate 3,3',5,5' - tetramethylbenzidine (TMB) was added to each well and  
585 incubated at room temperature for 5-30min for color development, and terminated by 100  $\mu$ L of  
586 0.16M sulfuric acid. The absorption at wavelength 450nm ( $A_{450nm}$ ) was read on a Cytation 1  
587 plate reader (BioTek, Winooski, VT, USA).

588

### 589 *Immunoblotting*

590 To prepare B cell fractions for immunoblotting, bone marrow B cells were sorted by flow  
591 cytometry as described above ( $\sim 10^4$ - $10^5$  cells each fraction), pelleted down by brief  
592 centrifugation, suspended in 50  $\mu$ L of 2xSDS-PAGE sample buffer, boiled at 95°C for 5 min, and  
593 centrifuged at 13,000xg for 10min. Immunoblotting was performed using standard procedures.  
594 Briefly, protein samples were resolved by SDS-PAGE (sodium dodecyl sulfate-polyacrylamide  
595 gel electrophoresis, 4-20% gradient) and transferred to a nitrocellulose membrane. The  
596 membrane was blocked in 5% fat-free milk at room temperature for one hour, incubated with a  
597 primary antibody over night at 4°C, washed briefly and incubated with an HRP-conjugated  
598 secondary antibody for 1 hour at room temperature. An ultra-sensitive or regular enhanced  
599 chemiluminescence (ECL) substrate was used for detection (ThermoFisher, Cat# 34095, 32106).  
600 For immunoblotting of proteins from an extremely low number of sorted bone marrow B cells, a  
601 Lumigen ECL substrate ought to be used (Southfield, Michigan 48033, USA).

602

### 603 *Reverse Transcription and Quantitative (q) PCR*

604 Up to  $1 \times 10^6$  cells or 10mg, tissues were collected in 350  $\mu$ L of RLT buffer (QIAGEN RNeasy  
605 Mini Kit). RNA was extracted following the QIAGEN RNeasy manufacturer's instructions.  
606 Reverse transcription of RNA into complementary DNA (cDNA) was performed using the BIO-  
607 RAD iScript™ cDNA Synthesis Kit. Quantitative PCR (qPCR) was performed with gene-specific  
608 primers and SYBR Green PCR master mix. Results were calculated using the  $-\Delta\Delta C_t$  method  
609 and a housekeeping gene, beta actin, as an internal control. The qPCR primers and probes for  
610 immune genes were reported in our previous studies<sup>15, 27,43</sup>. The new primers are listed in  
611 Table 1.

612

613 *Data Acquisition and Statistical Analysis*

614 The sample size chosen for our animal experiments in this study was estimated according to  
615 our prior experience in similar sets of experiments and power analysis calculations  
616 ([http://isogenic.info/html/power\\_analysis.html](http://isogenic.info/html/power_analysis.html)). All animal results were included and no method  
617 of randomization was applied. All data were analyzed with a GraphPad Prism software by non-  
618 parametric Mann-Whitney test or two-tailed Student's *t*-test depending on the data distribution.  
619 The survival curves were analyzed by a Log-Rank test. P values of  $\leq 0.05$  were considered  
620 statistically significant.

621

622 **Footnotes**

623

624 Author contribution: T.G designed and performed the majority of the experimental procedures  
625 and data analyses. D.Y. helped T.G. with most of the experimental procedures. T.L. and A.G.H.  
626 contributed to some of the experimental procedures. B.W. contributed to flow cytometry  
627 analysis. B.T. and L.H. helped to acquire the influenza data. K.W provided guidance to bone  
628 marrow transplantation experiments. Y.W., L.Y., G.C., L.H., A.T.V. and E.F. contributed to  
629 discussion, data interpretations and/or helped to improve writing. P.W. conceived and oversaw  
630 the study. T.G. and P.W. wrote the paper and all the authors reviewed and/or modified the  
631 manuscript.

632

633 Funding Source: This project was funded in part by National Institutes of Health grants to P. W,  
634 R01AI132526 and R21AI155820, and an UConn Health startup fund to P.W.

635

636 Conflict of Interest: No financial or non-financial interest to disclose.

637

638 Data availability: All data generated or analysed during this study are included in this published  
639 article (and its supplementary information files). The raw RNAseq data is available at  
640 <https://www.ncbi.nlm.nih.gov/geo/>, GEO # (pending)

641

642 Biological materials: All unique materials used are readily available from the authors. However,  
643 the availability of live animals may change over time.

644

645

646

647 **References**

- 648
- 649 1 Boettcher, S. & Manz, M. G. Regulation of Inflammation- and Infection-Driven  
650 Hematopoiesis. *Trends Immunol* **38**, 345-357, doi:10.1016/j.it.2017.01.004 (2017).
  - 651 2 Dancey, J. T., Deubelbeiss, K. A., Harker, L. A. & Finch, C. A. Neutrophil kinetics in man.  
652 *J Clin Invest* **58**, 705-715, doi:10.1172/JCI108517 (1976).
  - 653 3 Rieger, M. A. & Schroeder, T. Hematopoiesis. *Cold Spring Harb Perspect Biol* **4**,  
654 doi:10.1101/cshperspect.a008250 (2012).
  - 655 4 Busch, K. *et al.* Fundamental properties of unperturbed haematopoiesis from stem cells  
656 in vivo. *Nature* **518**, 542-546, doi:10.1038/nature14242 (2015).
  - 657 5 Rodriguez-Fraticelli, A. E. *et al.* Clonal analysis of lineage fate in native haematopoiesis.  
658 *Nature* **553**, 212-216, doi:10.1038/nature25168 (2018).
  - 659 6 Melchers, F. Checkpoints that control B cell development. *J Clin Invest* **125**, 2203-2210,  
660 doi:10.1172/JCI78083 (2015).
  - 661 7 Schubert, C. & Buchberger, A. UBX domain proteins: major regulators of the AAA  
662 ATPase Cdc48/p97. *Cell Mol Life Sci* **65**, 2360-2371, doi:10.1007/s00018-008-8072-8  
663 (2008).
  - 664 8 Kondo, H. *et al.* p47 is a cofactor for p97-mediated membrane fusion. *Nature* **388**, 75-78  
665 (1997).
  - 666 9 Alexandru, G. *et al.* UBXD7 binds multiple ubiquitin ligases and implicates p97 in  
667 HIF1alpha turnover. *Cell* **134**, 804-816, doi:10.1016/j.cell.2008.06.048 (2008).
  - 668 10 Wang, P. *et al.* UBXN1 interferes with Rig-I-like receptor-mediated antiviral immune  
669 response by targeting MAVS. *Cell Rep* **3**, 1057-1070, doi:10.1016/j.celrep.2013.02.027  
670 (2013).
  - 671 11 Kim, J. H. *et al.* FAS-associated factor-1 positively regulates type I interferon response  
672 to RNA virus infection by targeting NLRX1. *PLoS Pathog* **13**, e1006398,  
673 doi:10.1371/journal.ppat.1006398 (2017).
  - 674 12 Dai, T. *et al.* FAF1 Regulates Antiviral Immunity by Inhibiting MAVS but Is Antagonized  
675 by Phosphorylation upon Viral Infection. *Cell Host Microbe* **24**, 776-790 e775,  
676 doi:10.1016/j.chom.2018.10.006 (2018).
  - 677 13 Wang, Y. B. *et al.* Ubiquitin-associated Domain-containing UBX Protein UBXN1 is a  
678 Negative Regulator of NF-kappaB Signaling. *J Biol Chem*, doi:10.1074/jbc.M114.631689  
679 (2015).
  - 680 14 Hu, Y. *et al.* Multiple UBXN family members inhibit retrovirus and lentivirus production  
681 and canonical NFkappaBeta signaling by stabilizing IkappaBalpha. *PLoS Pathog* **13**,  
682 e1006187, doi:10.1371/journal.ppat.1006187 (2017).
  - 683 15 Yang, L. *et al.* UBXN3B positively regulates STING-mediated antiviral immune  
684 responses. *Nat Commun* **9**, 2329, doi:10.1038/s41467-018-04759-8 (2018).
  - 685 16 Harrison, A. G., Lin, T. & Wang, P. Mechanisms of SARS-CoV-2 Transmission and  
686 Pathogenesis. *Trends Immunol* **41**, 1100-1115, doi:10.1016/j.it.2020.10.004 (2020).
  - 687 17 Bai, Y. & Tao, X. Comparison of COVID-19 and influenza characteristics. *J Zhejiang*  
688 *Univ Sci B* **22**, 87-98, doi:10.1631/jzus.B2000479 (2021).
  - 689 18 Sun, J. *et al.* Generation of a Broadly Useful Model for COVID-19 Pathogenesis,  
690 Vaccination, and Treatment. *Cell* **182**, 734-743 e735, doi:10.1016/j.cell.2020.06.010  
691 (2020).

- 692 19 Hassan, A. O. *et al.* A SARS-CoV-2 Infection Model in Mice Demonstrates Protection by  
693 Neutralizing Antibodies. *Cell* **182**, 744-753 e744, doi:10.1016/j.cell.2020.06.011 (2020).
- 694 20 de Candia, P., Prattichizzo, F., Garavelli, S. & Matarese, G. T Cells: Warriors of SARS-  
695 CoV-2 Infection. *Trends Immunol* **42**, 18-30, doi:10.1016/j.it.2020.11.002 (2021).
- 696 21 Choukrallah, M. A. & Matthias, P. The Interplay between Chromatin and Transcription  
697 Factor Networks during B Cell Development: Who Pulls the Trigger First? *Front Immunol*  
698 **5**, 156, doi:10.3389/fimmu.2014.00156 (2014).
- 699 22 Martensson, I. L., Almqvist, N., Grimsholm, O. & Bernardi, A. I. The pre-B cell receptor  
700 checkpoint. *FEBS Lett* **584**, 2572-2579, doi:10.1016/j.febslet.2010.04.057 (2010).
- 701 23 Dul, J. L. *et al.* The murine VpreB1 and VpreB2 genes both encode a protein of the  
702 surrogate light chain and are co-expressed during B cell development. *Eur J Immunol* **26**,  
703 906-913, doi:10.1002/eji.1830260428 (1996).
- 704 24 Mandal, M. *et al.* Ras orchestrates exit from the cell cycle and light-chain recombination  
705 during early B cell development. *Nat Immunol* **10**, 1110-1117, doi:10.1038/ni.1785  
706 (2009).
- 707 25 Shaw, A. C., Swat, W., Davidson, L. & Alt, F. W. Induction of Ig light chain gene  
708 rearrangement in heavy chain-deficient B cells by activated Ras. *Proc Natl Acad Sci U S*  
709 *A* **96**, 2239-2243, doi:10.1073/pnas.96.5.2239 (1999).
- 710 26 Groarke, E. M. & Young, N. S. Aging and Hematopoiesis. *Clin Geriatr Med* **35**, 285-293,  
711 doi:10.1016/j.cger.2019.03.001 (2019).
- 712 27 Geng, T. *et al.* A critical role for STING signaling in limiting pathogenesis of Chikungunya  
713 virus. *J Infect Dis*, doi:10.1093/infdis/jiaa694 (2020).
- 714 28 He, X. *et al.* Temporal dynamics in viral shedding and transmissibility of COVID-19. *Nat*  
715 *Med* **26**, 672-675, doi:10.1038/s41591-020-0869-5 (2020).
- 716 29 Liu, J. *et al.* Neutrophil-to-lymphocyte ratio predicts critical illness patients with 2019  
717 coronavirus disease in the early stage. *J Transl Med* **18**, 206, doi:10.1186/s12967-020-  
718 02374-0 (2020).
- 719 30 Guo, X. *et al.* Neutrophil:lymphocyte ratio is positively related to type 2 diabetes in a  
720 large-scale adult population: a Tianjin Chronic Low-Grade Systemic Inflammation and  
721 Health cohort study. *Eur J Endocrinol* **173**, 217-225, doi:10.1530/EJE-15-0176 (2015).
- 722 31 Angkananard, T., Anothaisintawee, T., McEvoy, M., Attia, J. & Thakkinstian, A.  
723 Neutrophil Lymphocyte Ratio and Cardiovascular Disease Risk: A Systematic Review  
724 and Meta-Analysis. *Biomed Res Int* **2018**, 2703518, doi:10.1155/2018/2703518 (2018).
- 725 32 Li, J. *et al.* Neutrophil-to-Lymphocyte Ratio Positively Correlates to Age in Healthy  
726 Population. *J Clin Lab Anal* **29**, 437-443, doi:10.1002/jcla.21791 (2015).
- 727 33 Martensson, I. L. & Ceredig, R. Review article: role of the surrogate light chain and the  
728 pre-B-cell receptor in mouse B-cell development. *Immunology* **101**, 435-441,  
729 doi:10.1046/j.1365-2567.2000.00151.x (2000).
- 730 34 Hendriks, R. W. & Middendorp, S. The pre-BCR checkpoint as a cell-autonomous  
731 proliferation switch. *Trends Immunol* **25**, 249-256, doi:10.1016/j.it.2004.02.011 (2004).
- 732 35 Minegishi, Y. *et al.* An essential role for BLNK in human B cell development. *Science*  
733 **286**, 1954-1957, doi:10.1126/science.286.5446.1954 (1999).
- 734 36 Pappu, R. *et al.* Requirement for B cell linker protein (BLNK) in B cell development.  
735 *Science* **286**, 1949-1954, doi:10.1126/science.286.5446.1949 (1999).
- 736 37 Ketkar, H. *et al.* UBX Domain Protein 6 Positively Regulates JAK-STAT1/2 Signaling. *J*  
737 *Immunol* **206**, 2682-2691, doi:10.4049/jimmunol.1901337 (2021).



- 738 38 Imai, N. *et al.* Hepatocyte-Specific Depletion of UBXD8 Induces Periportal Steatosis in  
739 Mice Fed a High-Fat Diet. *PLoS One* **10**, e0127114, doi:10.1371/journal.pone.0127114  
740 (2015).
- 741 39 Wang, P. *et al.* Caspase-12 controls West Nile virus infection via the viral RNA receptor  
742 RIG-I. *Nat Immunol* **11**, 912-919, doi:10.1038/ni.1933 (2010).
- 743 40 Chen, N. *et al.* Epidemiological and clinical characteristics of 99 cases of 2019 novel  
744 coronavirus pneumonia in Wuhan, China: a descriptive study. *The Lancet* **395**, 507–513,  
745 doi:[https://doi.org/10.1016/S0140-6736\(20\)30211-7](https://doi.org/10.1016/S0140-6736(20)30211-7) (2020).
- 746 41 Lin, T. *et al.* CXCL10 Signaling Contributes to the Pathogenesis of Arthritogenic  
747 Alphaviruses. *Viruses* **12**, doi:10.3390/v12111252 (2020).
- 748 42 Bagger, F. O. *et al.* BloodSpot: a database of gene expression profiles and  
749 transcriptional programs for healthy and malignant haematopoiesis. *Nucleic Acids Res*  
750 **44**, D917-924, doi:10.1093/nar/gkv1101 (2016).
- 751 43 Yang, L. *et al.* Macrophage scavenger receptor 1 controls Chikungunya virus infection  
752 through autophagy in mice. *Commun Biol* **3**, 556, doi:10.1038/s42003-020-01285-6  
753 (2020).
- 754
- 755

756 **FIGURE LEGEND**

757

758

759 **Fig.1 UBXN3B is essential for controlling SARS-CoV-2 and influenza pathogenesis. a-d)**

760 Sex-and-age matched mice were administered  $2 \times 10^5$  plaque forming units (PFU) of SARS-CoV-

761 2 intranasally. **a)** Percentage changes in the body mass of mock-treated Cre<sup>+</sup> Ubxn3b<sup>flox/flox</sup>

762 (designated Ubxn3b<sup>+/+</sup>) and tamoxifen (TMX) -treated Cre<sup>+</sup> Ubxn3b<sup>flox/flox</sup> (designated Ubxn3b<sup>-/-</sup>)

763 littermates, during the course of SARS-CoV-2 infection. Data point: mean  $\pm$  s.e.m, N=6-8. \*,

764  $p < 0.05$ ; \*\*,  $p < 0.01$ ; \*\*\*,  $p < 0.001$  (two-tailed Student's *t*-test). **b)** Representative micrographs of

765 hematoxylin and eosin staining (H&E) of lung sections from mock or SARS-CoV-2 infected mice

766 on day 3 and 10 post infection (p.i.). The green arrow points to a cluster of immune infiltrates.

767 The red arrow indicates a cluster of brownish cells of hemosiderosis. Magnification 400 x. **c)**

768 Iron-staining (blue) of lung sections from mock or SARS-CoV-2 infected mice on days 3 and

769 10p.i. Black arrows point to iron laden cells. Mock: mock infected. N=2 (mock), 4 (Day 3), 7 (Day

770 10), 3 (Day 35) per genotype. **e, f)** Sex-and-age matched mice were administered 350 CCID<sub>50</sub>

771 (cell culture infectious dose 50% assay) influenza A PR/8/34 H1N1 intranasally. **e)** The

772 percentage of the body mass relative to day 0 (weighed immediately before infection). Data

773 point: mean  $\pm$  s.e.m. N= 5-6. **f)** The survival curve. N=6 per genotype. P=0.02 (Log-Rank test).

774

775 **Fig.2 UBXN3B is essential for immune cell homeostasis during SARS-CoV-2 infection.**

776 Sex-and-age matched mice were administered  $2 \times 10^5$  plaque forming units (PFU) of SARS-CoV-

777 2 intranasally. **a)** Total CD45<sup>+</sup> cells, **b)** the percentage (relative to CD45<sup>+</sup> cells) of various

778 immune cell populations quantified by flow cytometry, **c)** the neutrophil-to-T cell ratio, in one

779 lung of SARS-CoV-2 infected mice at day 3 post infection (p.i.). **d)** The percentage (relative to

780 CD45<sup>+</sup> cells) of various immune cell compartments, and **e**) the neutrophil-to-B/T cell ratios (N/B,  
781 N/T), in the blood at day 3 post infection (p.i.). The cell counts and percentage of various  
782 immune cell populations **f**) and **g**) the neutrophil-to-B/T cell ratios in one lung, **h**) cell counts in  
783 the blood at day 35 p.i. **i**) The concentrations of serum IgG against SARS-CoV-2 Spike and  
784 influenza A PR/8/34 H1N1 NP were quantitated by ELISA and presented as optical density at  
785 450nm (O.D<sub>450nm</sub>). Neu: neutrophil, Mac/Mono: macrophage/monocyte, DC: dendritic cell. Each  
786 symbol=one mouse. \*, p<0.05; \*\*, p<0.01; \*\*\*, p<0.001 (non-parametric Mann-Whitney test).  
787 The horizontal line indicates the median of the result.

788

789 **Fig.3 UBXN3B is essential for steady-state immune cell homeostasis.** The percentage  
790 (relative to CD45<sup>+</sup> cells) of various immune cell populations and cell counts were quantified by  
791 flow cytometry in the **a**) blood and **b**) spleen of specific pathogen-free littermates. **c**) The  
792 neutrophil to B/T cell ratios. Neu: neutrophil, Mac/Mono: macrophage/monocyte, DC: dendritic  
793 cell, Mast: mast cell, Eos: eosinophil, NK: natural killer, NKT: natural killer T cells. Each  
794 symbol=one mouse. The horizontal line indicates the median of the result. \*, p<0.05; \*\*, p<0.01;  
795 \*\*\*, p<0.001 (two-tailed Student's *t*-test).

796

797 **Fig.4 The essential role of UBXN3B for B cell development is cell-intrinsic.** Irradiated wild  
798 type (WT, CD45.1) recipient mice were transplanted with *Cre*<sup>+</sup>*Ubxn3b*<sup>fl/fl</sup> bone marrow (CD45.2).  
799 The mice were then treated with tamoxifen (TMX) to delete *Ubxn3b* in hematopoietic cells  
800 (designated *Ubxn3b*<sup>-/-</sup> BM-WT) or corn oil (designated *Ubxn3b*<sup>+/+</sup> BM-WT). The cell counts and  
801 percentage (relative to CD45<sup>+</sup> cells) of various immune cell populations in the blood were  
802 quantified by flow cytometry at days **a**) 15, **b**) 30, **c**) 45 after completion of the TMX treatment. **d**)

803 Iron-staining (blue) of lung sections at day 7 p.i. The black arrow points to iron-laden cells.  
804 Magnification: 100x. N=5. Each symbol=one mouse. The horizontal line indicates the median  
805 of the result. \*,  $p<0.05$ ; \*\*,  $p<0.01$ ; \*\*\*,  $p<0.001$  (two-tailed Student's *t*-test).

806

807 **Fig.5 UBXN3B is essential for pre-BI transition to pre-BII.** The frequencies of **a)** terminally  
808 differentiated immune cells and **b)** stem cells/progenitors, quantified by flow cytometry (relative  
809 to live cells after lysis of red blood cells). **c)** The frequencies and cellularity of B lineage subsets  
810 in the bone marrow of specific pathogen-free littermates. Neu: neutrophil, Mono: monocyte, DC:  
811 dendritic cell, NK: natural killer, LSK: Lin<sup>-</sup> Sca<sup>+</sup> Kit<sup>+</sup>, LT-HSC: long-term hematopoietic stem cell,  
812 ST-HSC: short-term multipotent HSC (also known as MPP), CMP: common myeloid progenitor,  
813 CLP: common lymphoid progenitor, GMP: granulocyte–macrophage progenitor, MEP:  
814 megakaryocyte–erythroid progenitor, pre-pro-B: pre-progenitor B, pro-B: progenitor B, pre-B:  
815 precursor B. Each symbol=one mouse. The horizontal line indicates the median of the result. \*,  
816  $p<0.05$ ; \*\*,  $p<0.01$ ; \*\*\*,  $p<0.001$  (two-tailed Student's *t*-test).

817

818 **Fig.6 UBXN3B maintains BLNK protein level and pre-BCR signaling.** **a)** qRT-PCR  
819 quantification of gene expression in bone marrow B lineage subsets of specific pathogen-free  
820 littermates. Pre-pro-B: pre-progenitor B, pro-B: progenitor B, pre-B: precursor B, Neu: neutrophil,  
821 Mono: monocyte. **b)** The cellularity of surface Vpreb1<sup>+</sup> cells and mean fluorescence intensity  
822 (MFI). Each symbol=one mouse. The horizontal line indicates the median of the result. \*,  $p<0.05$ ;  
823 \*\*,  $p<0.01$ ; \*\*\*,  $p<0.001$  (two-tailed Student's *t*-test). **c)** The Uniform Manifold Approximation  
824 and Projection (UMAP) of surrogate light chain (SLC) gene expression by scRNA-seq. Cells in  
825 the oval express a high level of SLC (SLC<sup>hi</sup>), while cells in the rectangle express a low level of

826 SLC (SLC<sup>lo</sup>). **d)** The most significant pathways for the down-regulated genes in *Ubxn3b*<sup>-/-</sup> SLC<sup>hi</sup>  
827 cells, when compared to *Ubxn3b*<sup>+/+</sup> cells. FDR: false discovery rate. **e)** Immunoblots for the  
828 indicated proteins in bone marrow B fractions. L: large. **f)** The violin plots of *Blnk* transcript  
829 levels by scRNAseq in bone marrow SLC<sup>hi</sup> and SLC<sup>lo</sup> B cells. **g)** The ratio of  $\Delta F$  (the difference  
830 of calcium load between any a given time after anti-IgM  $\mu$ H treatment and time point zero F0) to  
831 F0. Each dot represents the ratio of mean  $\Delta F/F0$  of all the cells recorded at a given time (every  
832 second). Below each chart is the immunoblot of BLNK. **c-g)** represent the results from three  
833 mice.

834

### 835 **Supplemental Materials**

836 Supplemental Figs. 1-9.

837 Supplemental Table 1-4.

838 Supplemental Movie 1: SARS-CoV-2-infected *Ubxn3b*<sup>+/+</sup> mice on day 2 after infection.

839 Supplemental Movie 2: SARS-CoV-2-infected *Ubxn3b*<sup>-/-</sup> mice on day 2 after infection.

840

**Fig.1**

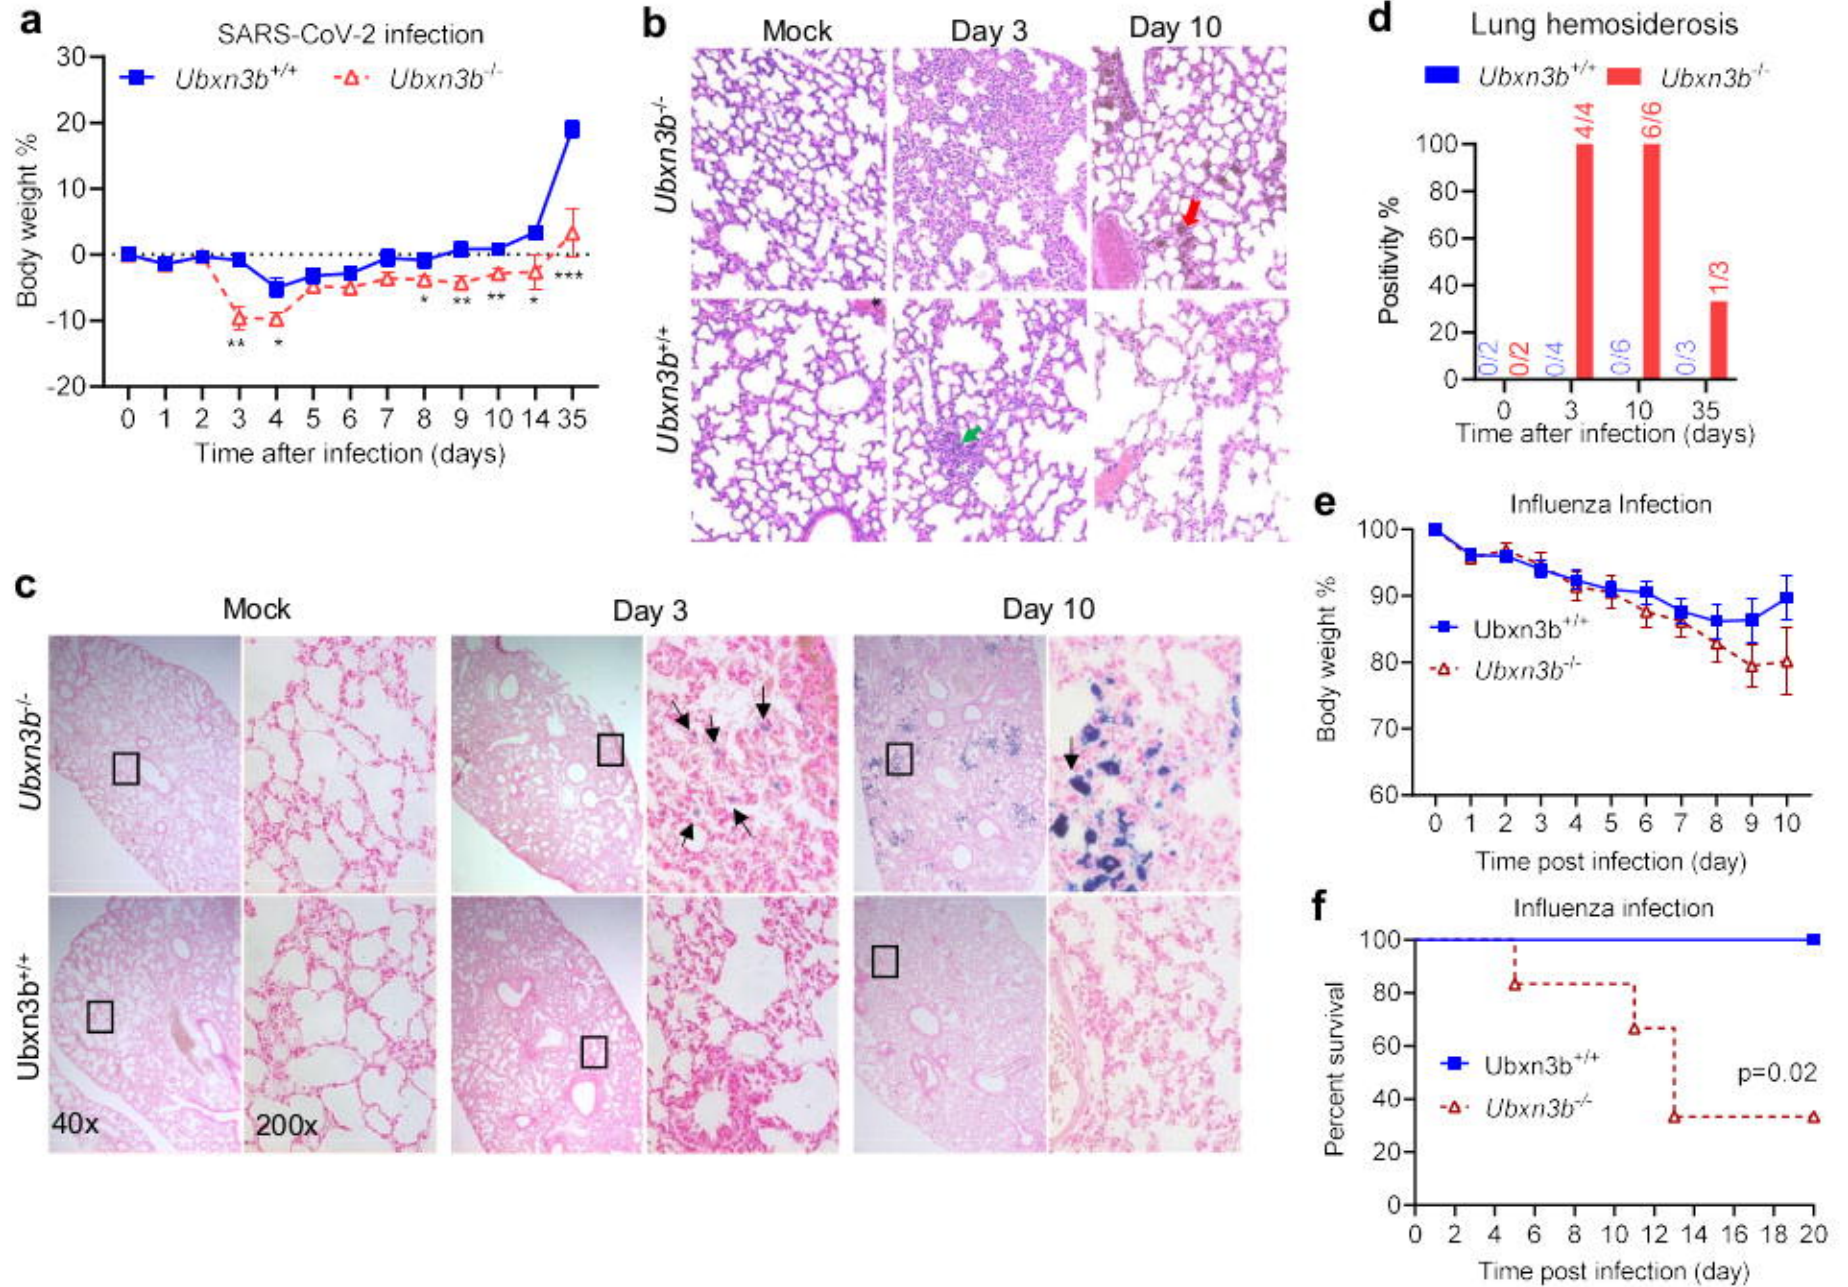

Fig.2

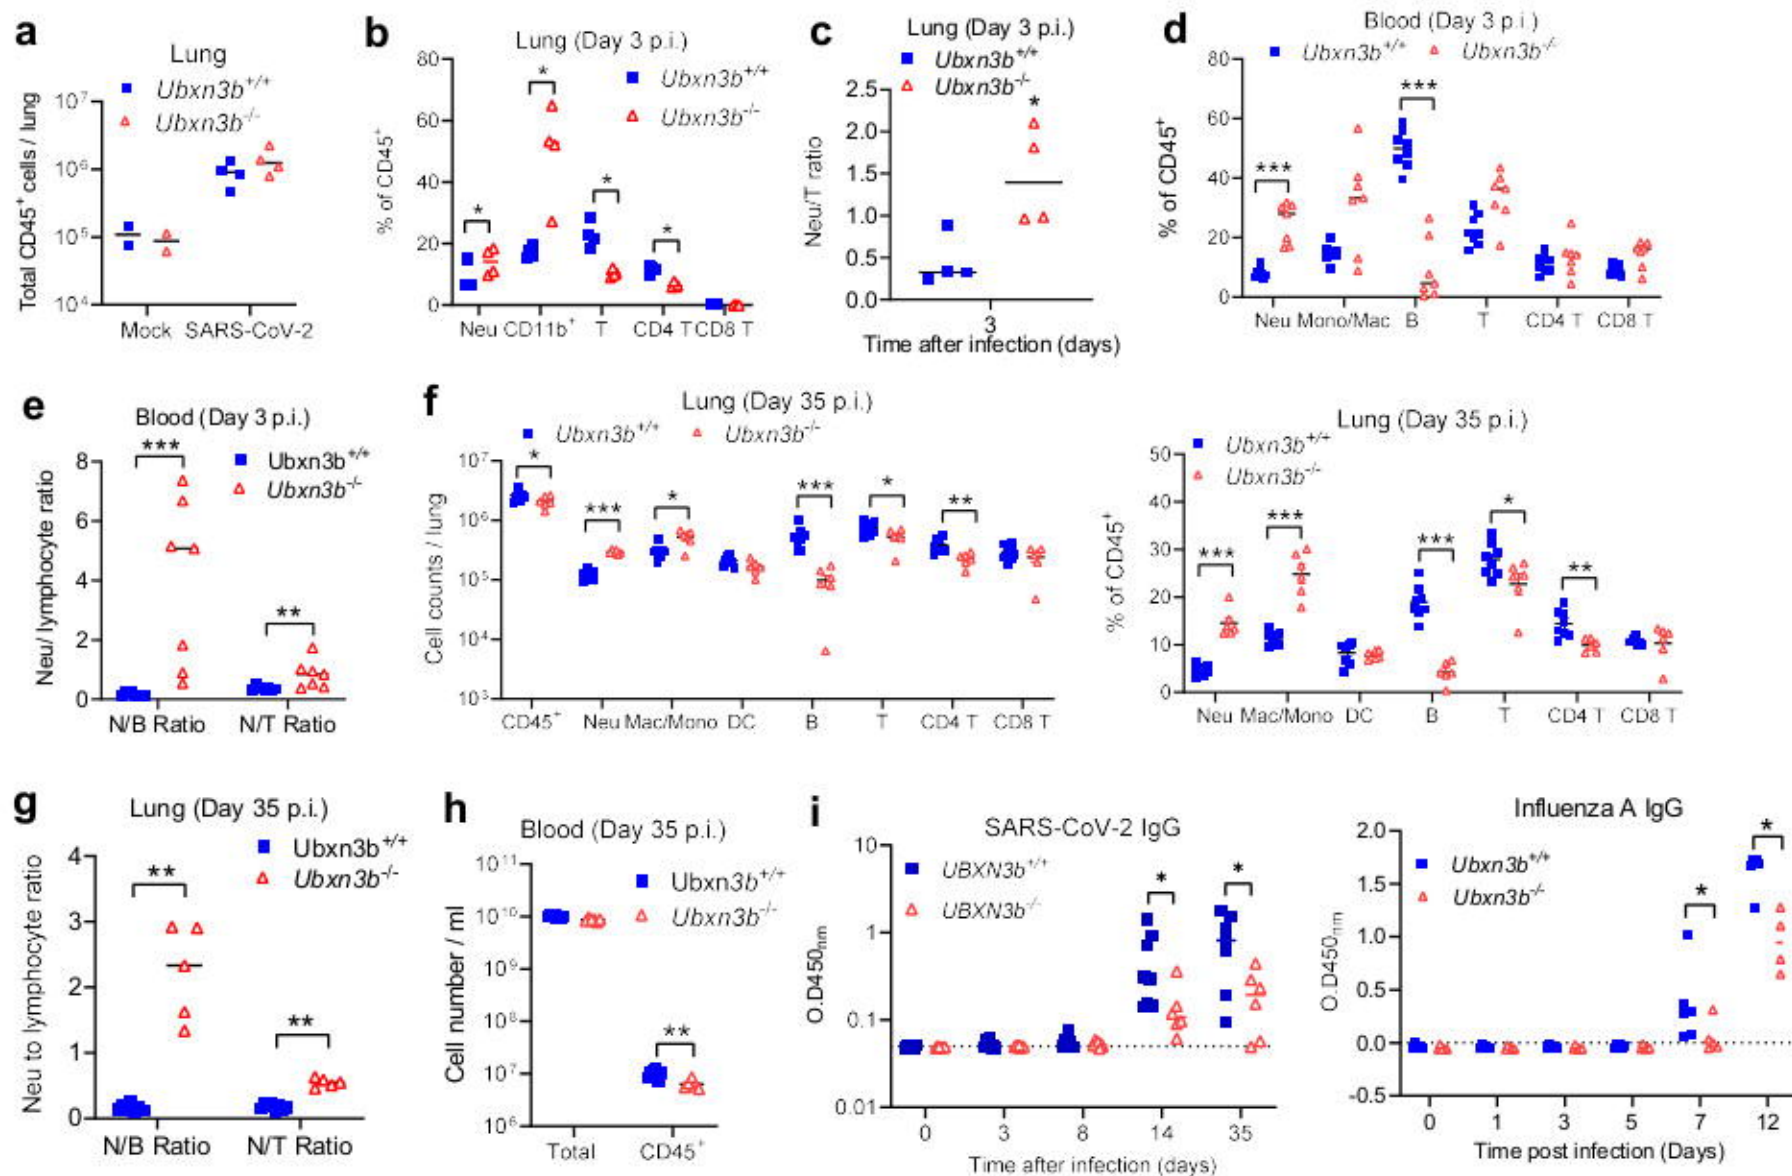

Fig.3

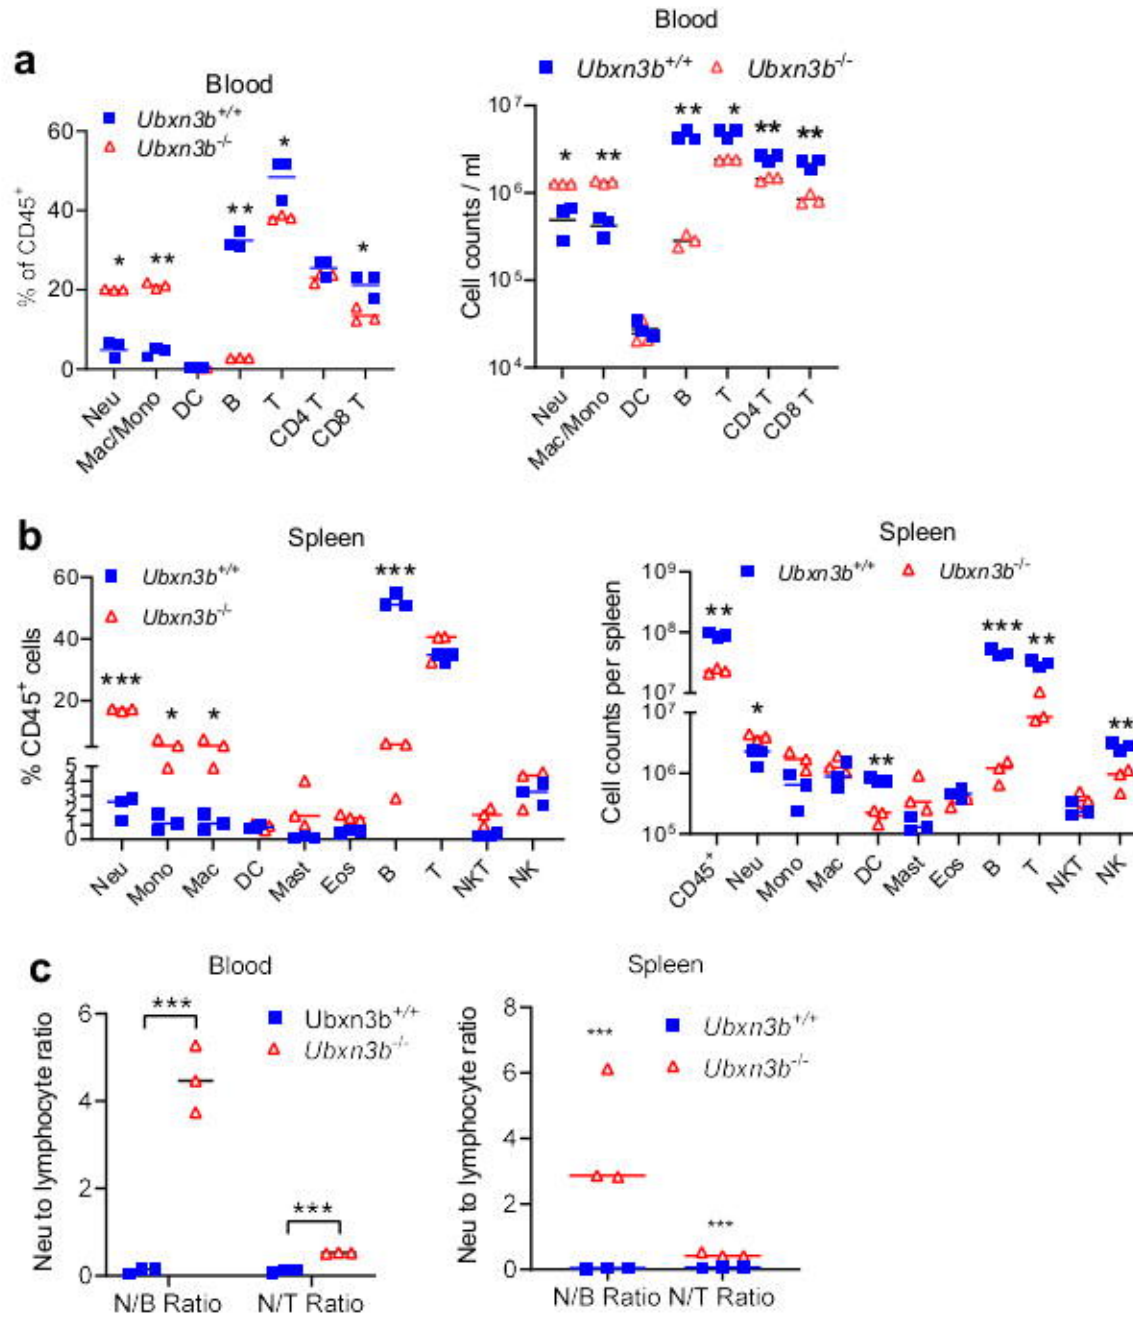



**Fig.4**

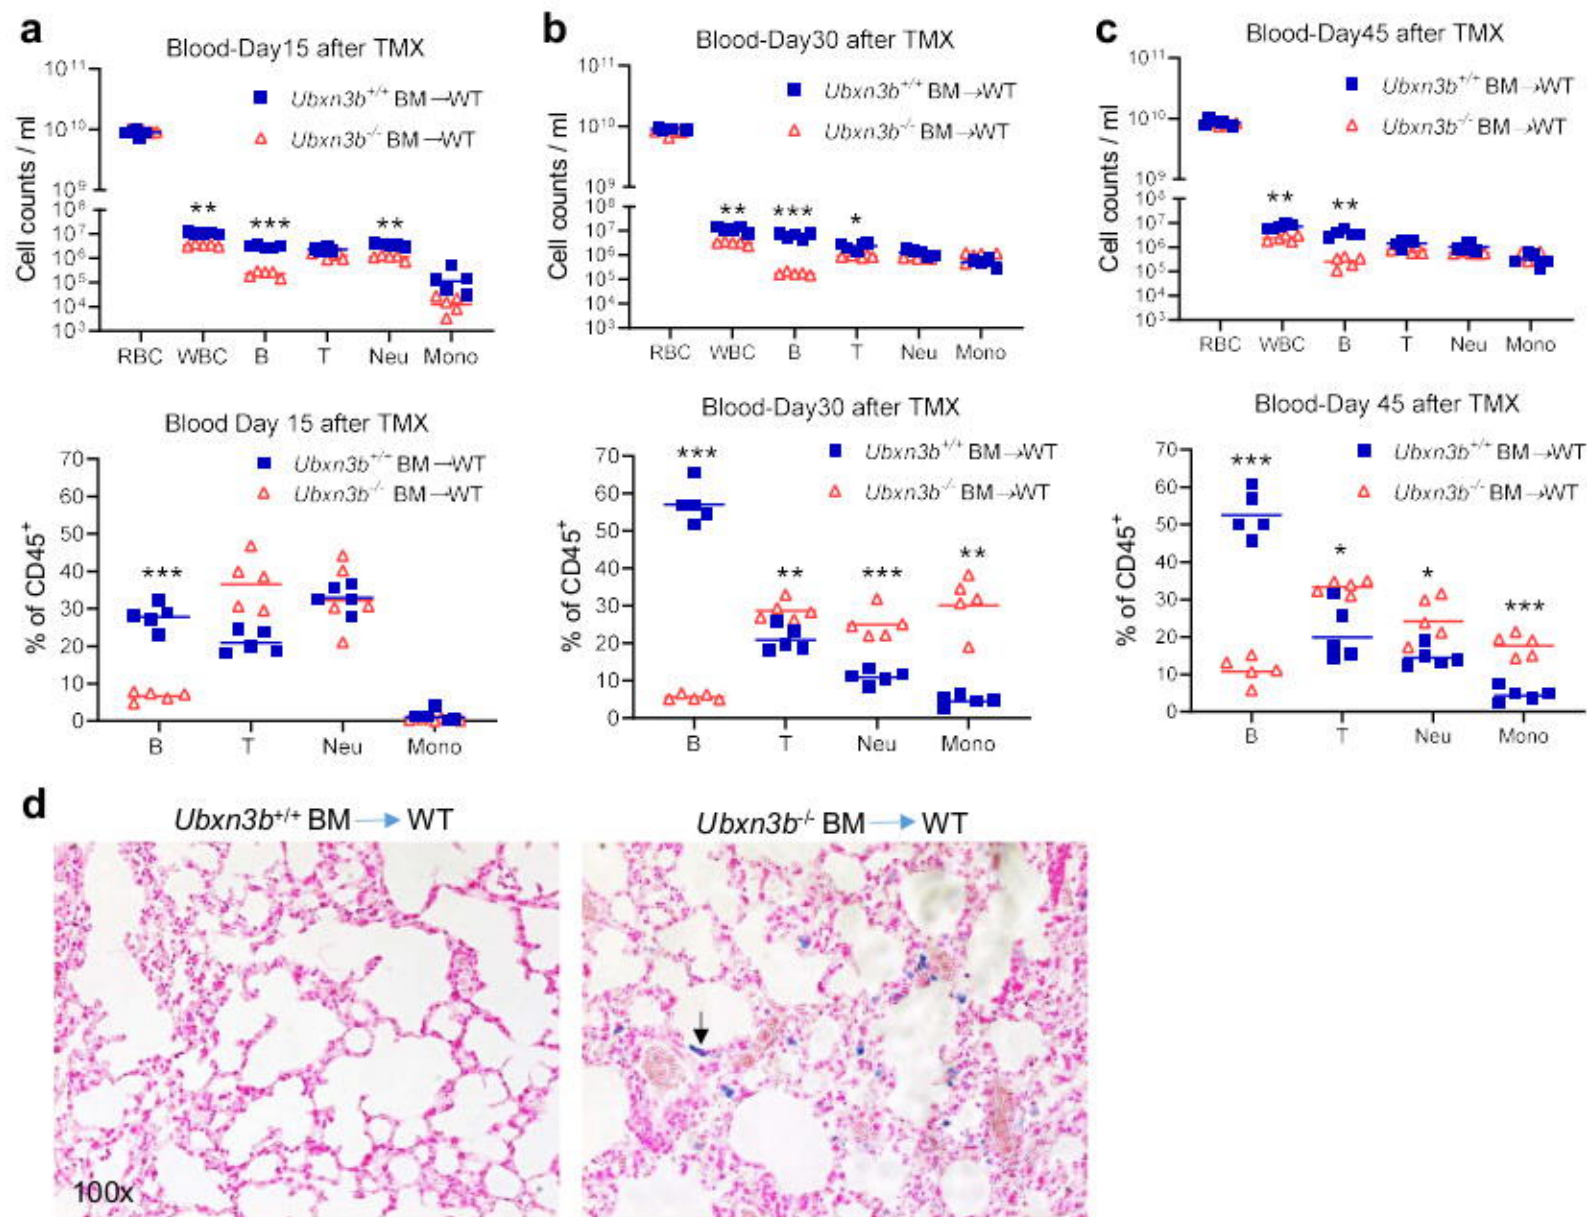

Fig.5

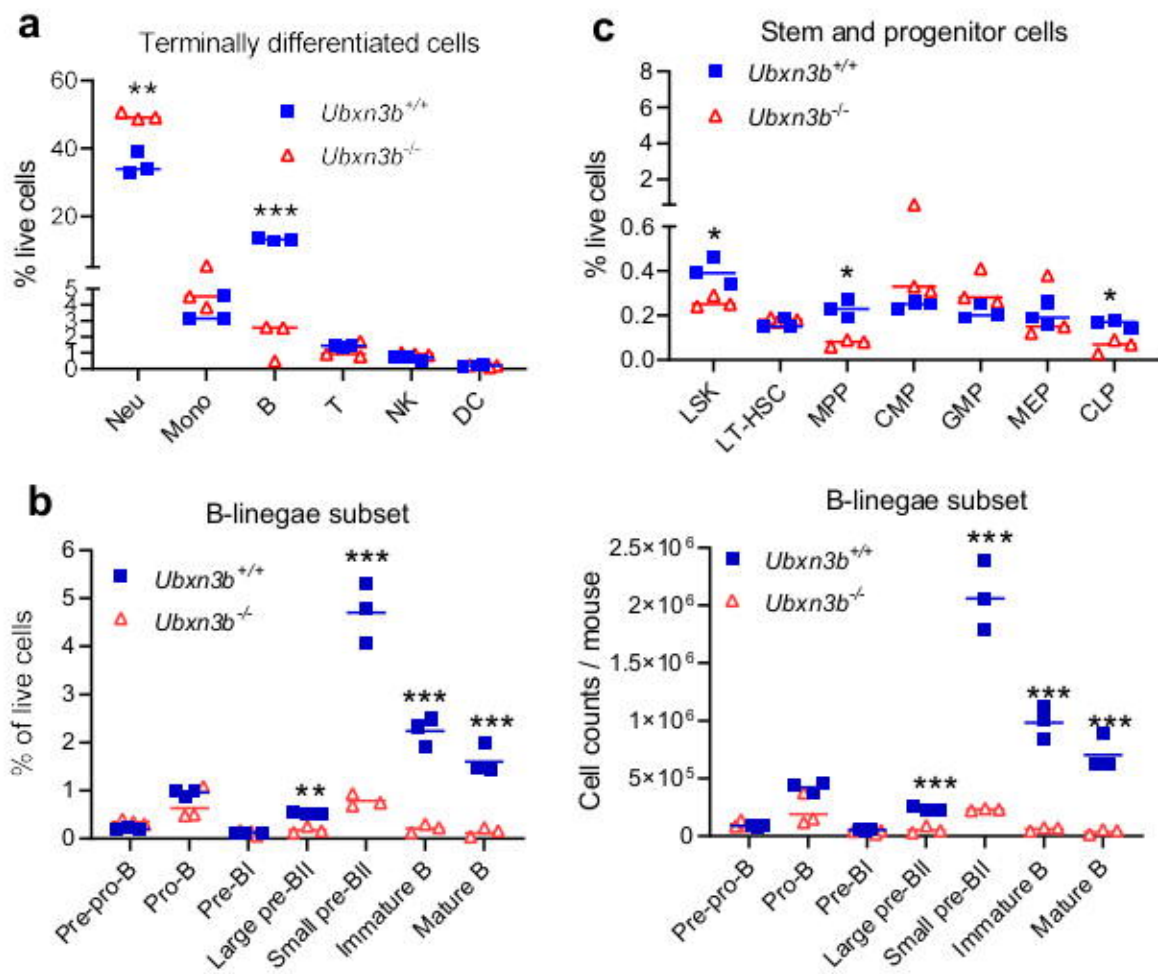

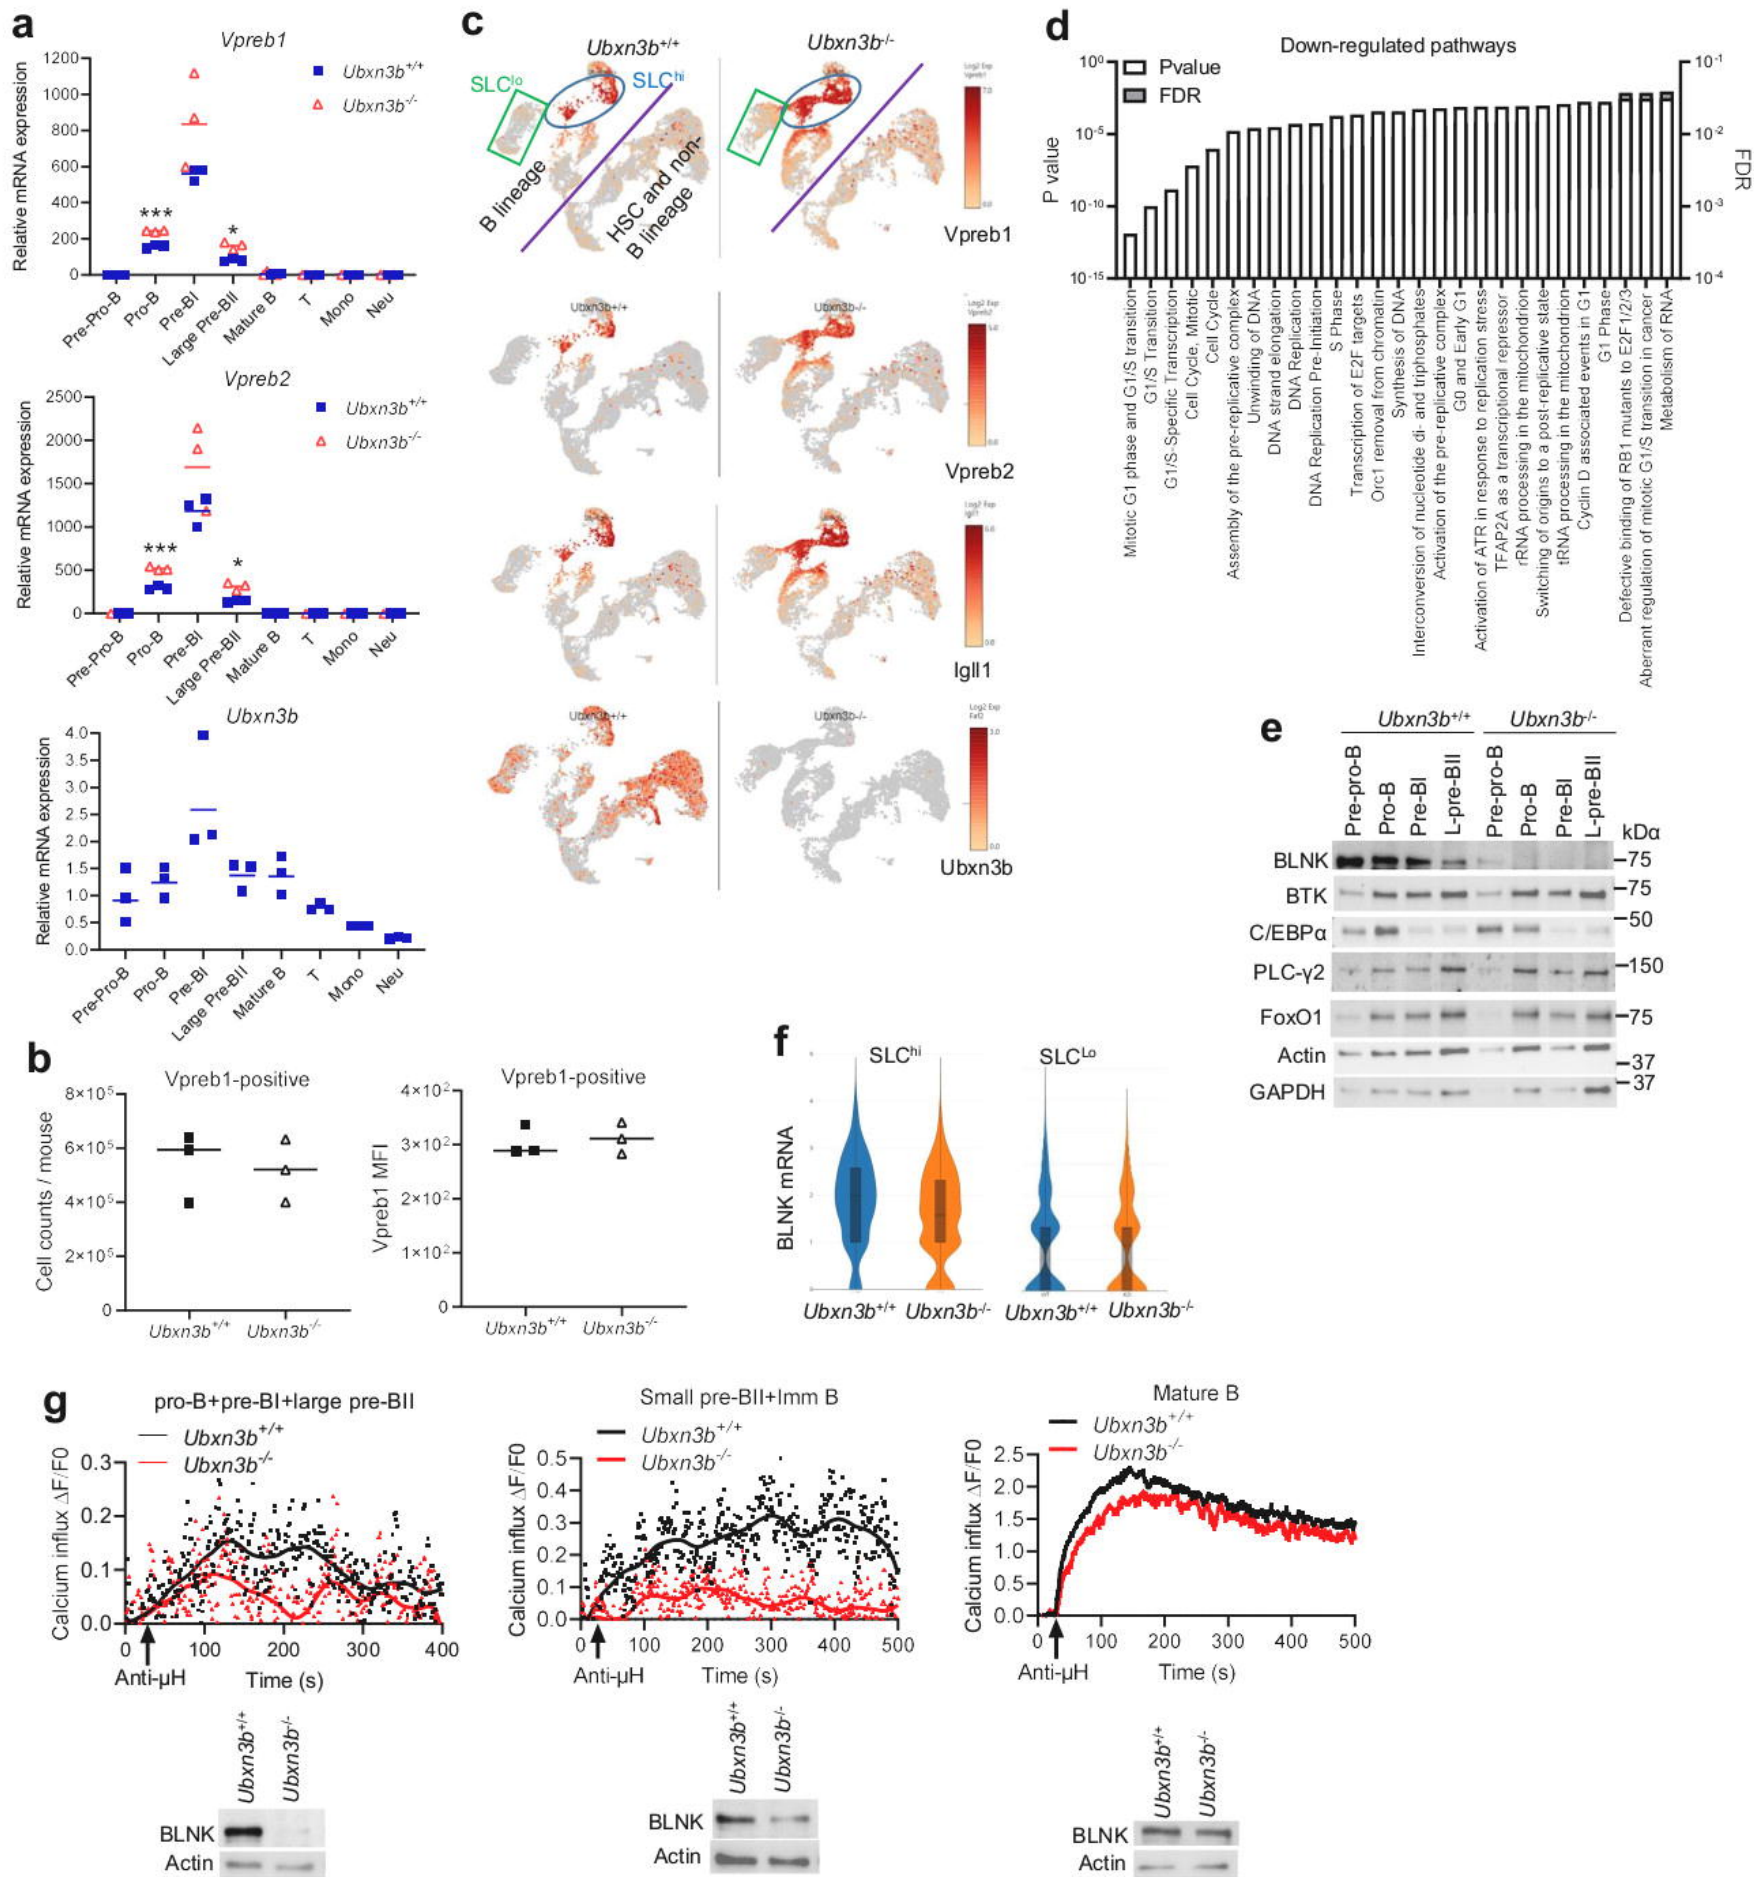

Source: https://www.biorxiv.org/content/biorxiv/early/2021/08/24/2021.03.04.433919.full.pdf
